# Supplementary material for: Climate change influences on the potential geographic distribution of the disease vector tick Ixodes ricinus
Source: PubMed Central journal article supplement (PMC5716528; doi:10.1371/journal.pone.0189092), 2017-12-05

**S4 File. Relative contributions of six environmental variables to the ecological niche models for *Ixodes ricinus* and its response to those variables. This supporting information shows the results regarding the relative contributions of six environmental variables to models for *I. ricinus* based on 5 random subsets of occurrences.**

Table I. The relative contributions of the environmental variables to the ecological niche models for *Ixodes ricinus* based on five random subsets selected in the analyses.

| Variable                  | % Contribution |           |           |           |           |
|---------------------------|----------------|-----------|-----------|-----------|-----------|
|                           | Subset #1      | Subset #2 | Subset #3 | Subset #4 | Subset #5 |
| Annual Precipitation      | 56.5           | 55.1      | 50.3      | 55        | 57.3      |
| Temperature Annual Range  | 21.5           | 21.8      | 28.1      | 23.8      | 25.1      |
| Annual Mean Temperature   | 8.1            | 11.3      | 10.6      | 8.6       | 11.1      |
| Precipitation Seasonality | 5.8            | 2.8       | 5.2       | 7.4       | 1.6       |
| Isothermality             | 4.6            | 3.6       | 3.3       | 2.9       | 1.5       |
| Mean Diurnal Range        | 3.5            | 5.3       | 2.6       | 2.2       | 3.4       |

Figure I. Response curves of *Ixodes ricinus* to the six environmental variables included in the model based on five random subsets of occurrences; a) subset #1, b) subset #2, c) subset #3, d) subset #4, and e) subset #5. The graph shows how the Maxent logistic prediction (y-axis) varies across the range of values of each predictor when used in a one-variable model. Red line presents the mean response of 10 iterations of the Maxent runs and the blue area presents mean  $\pm$  one standard deviation.

(a)

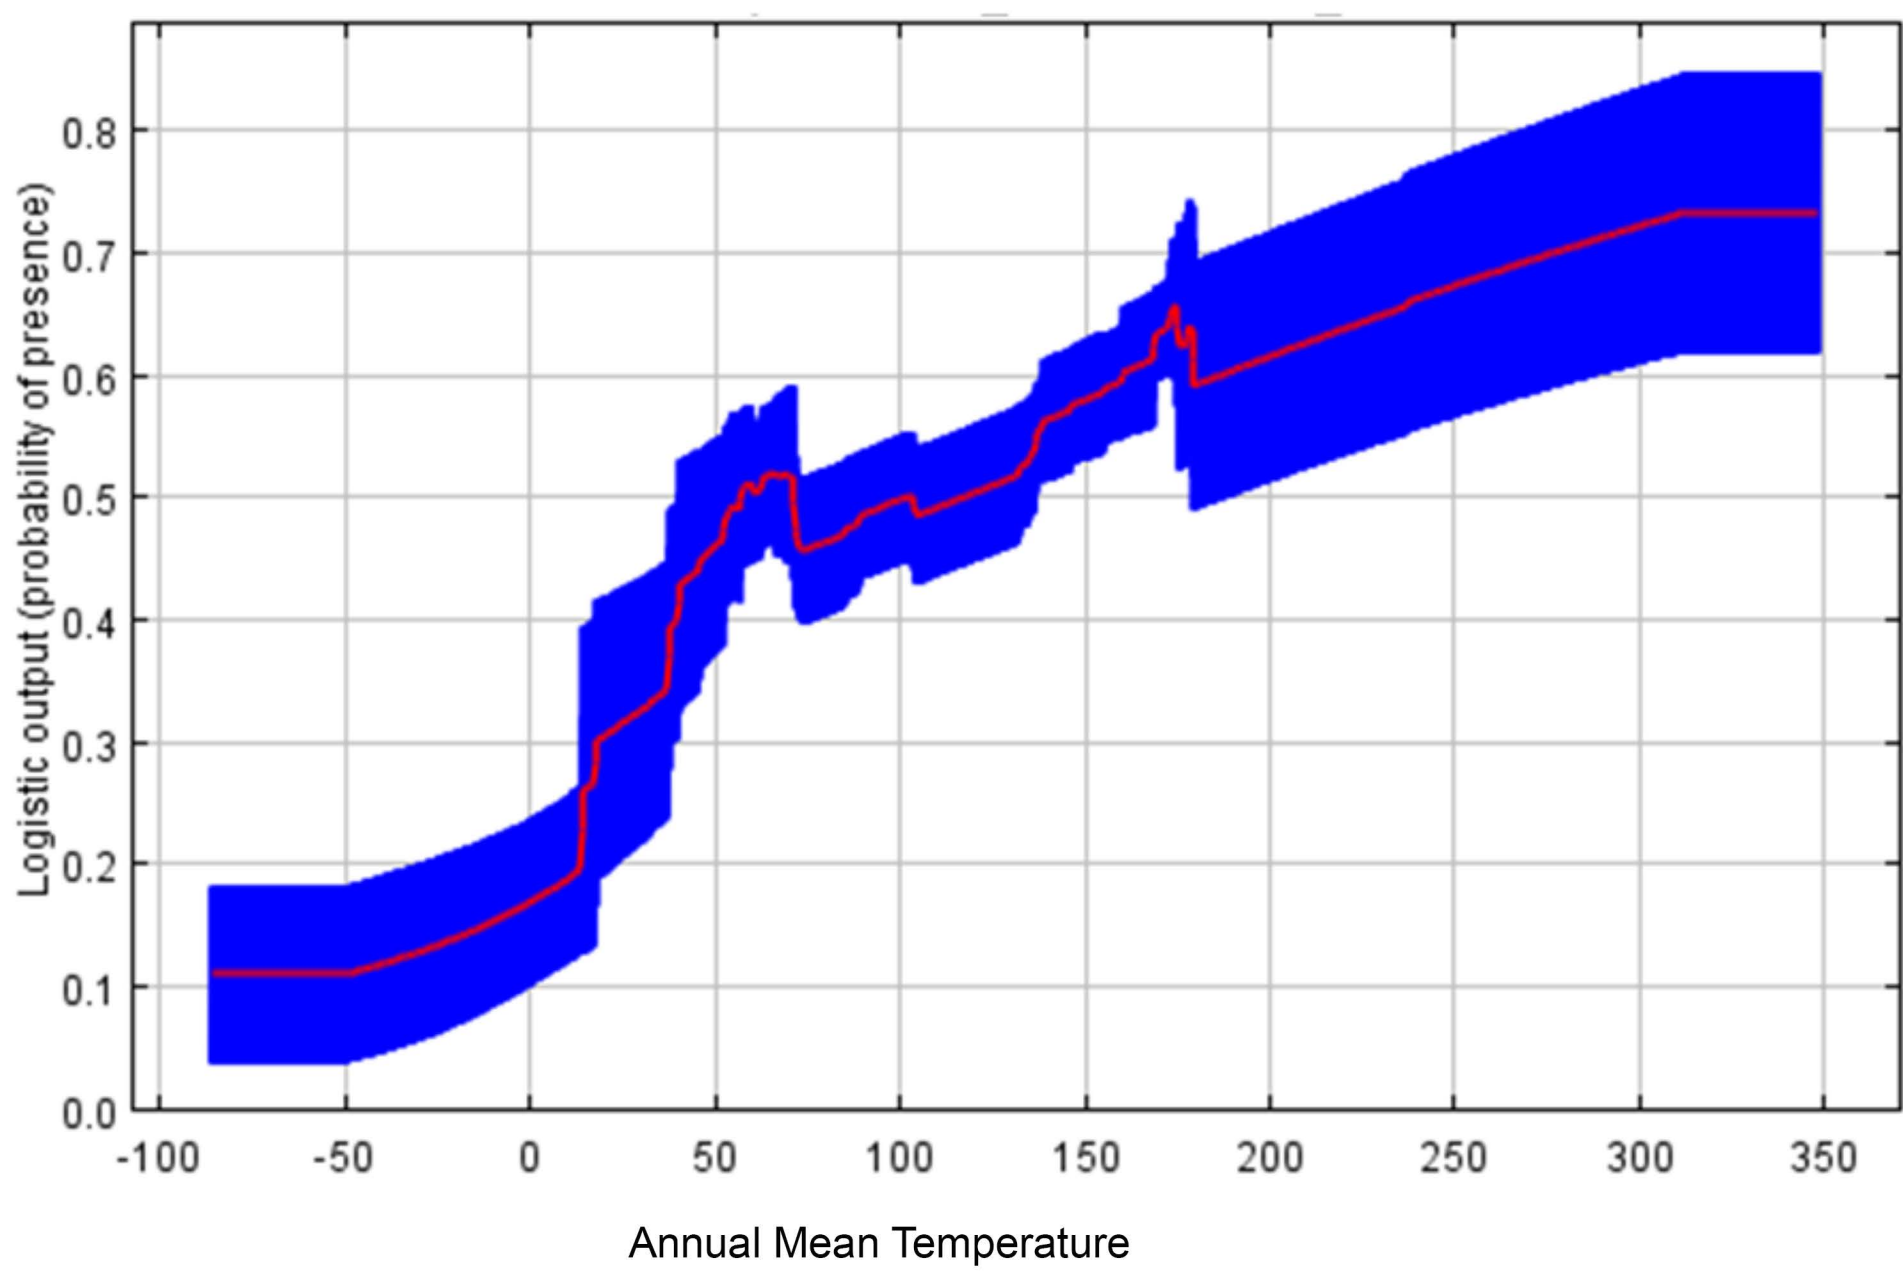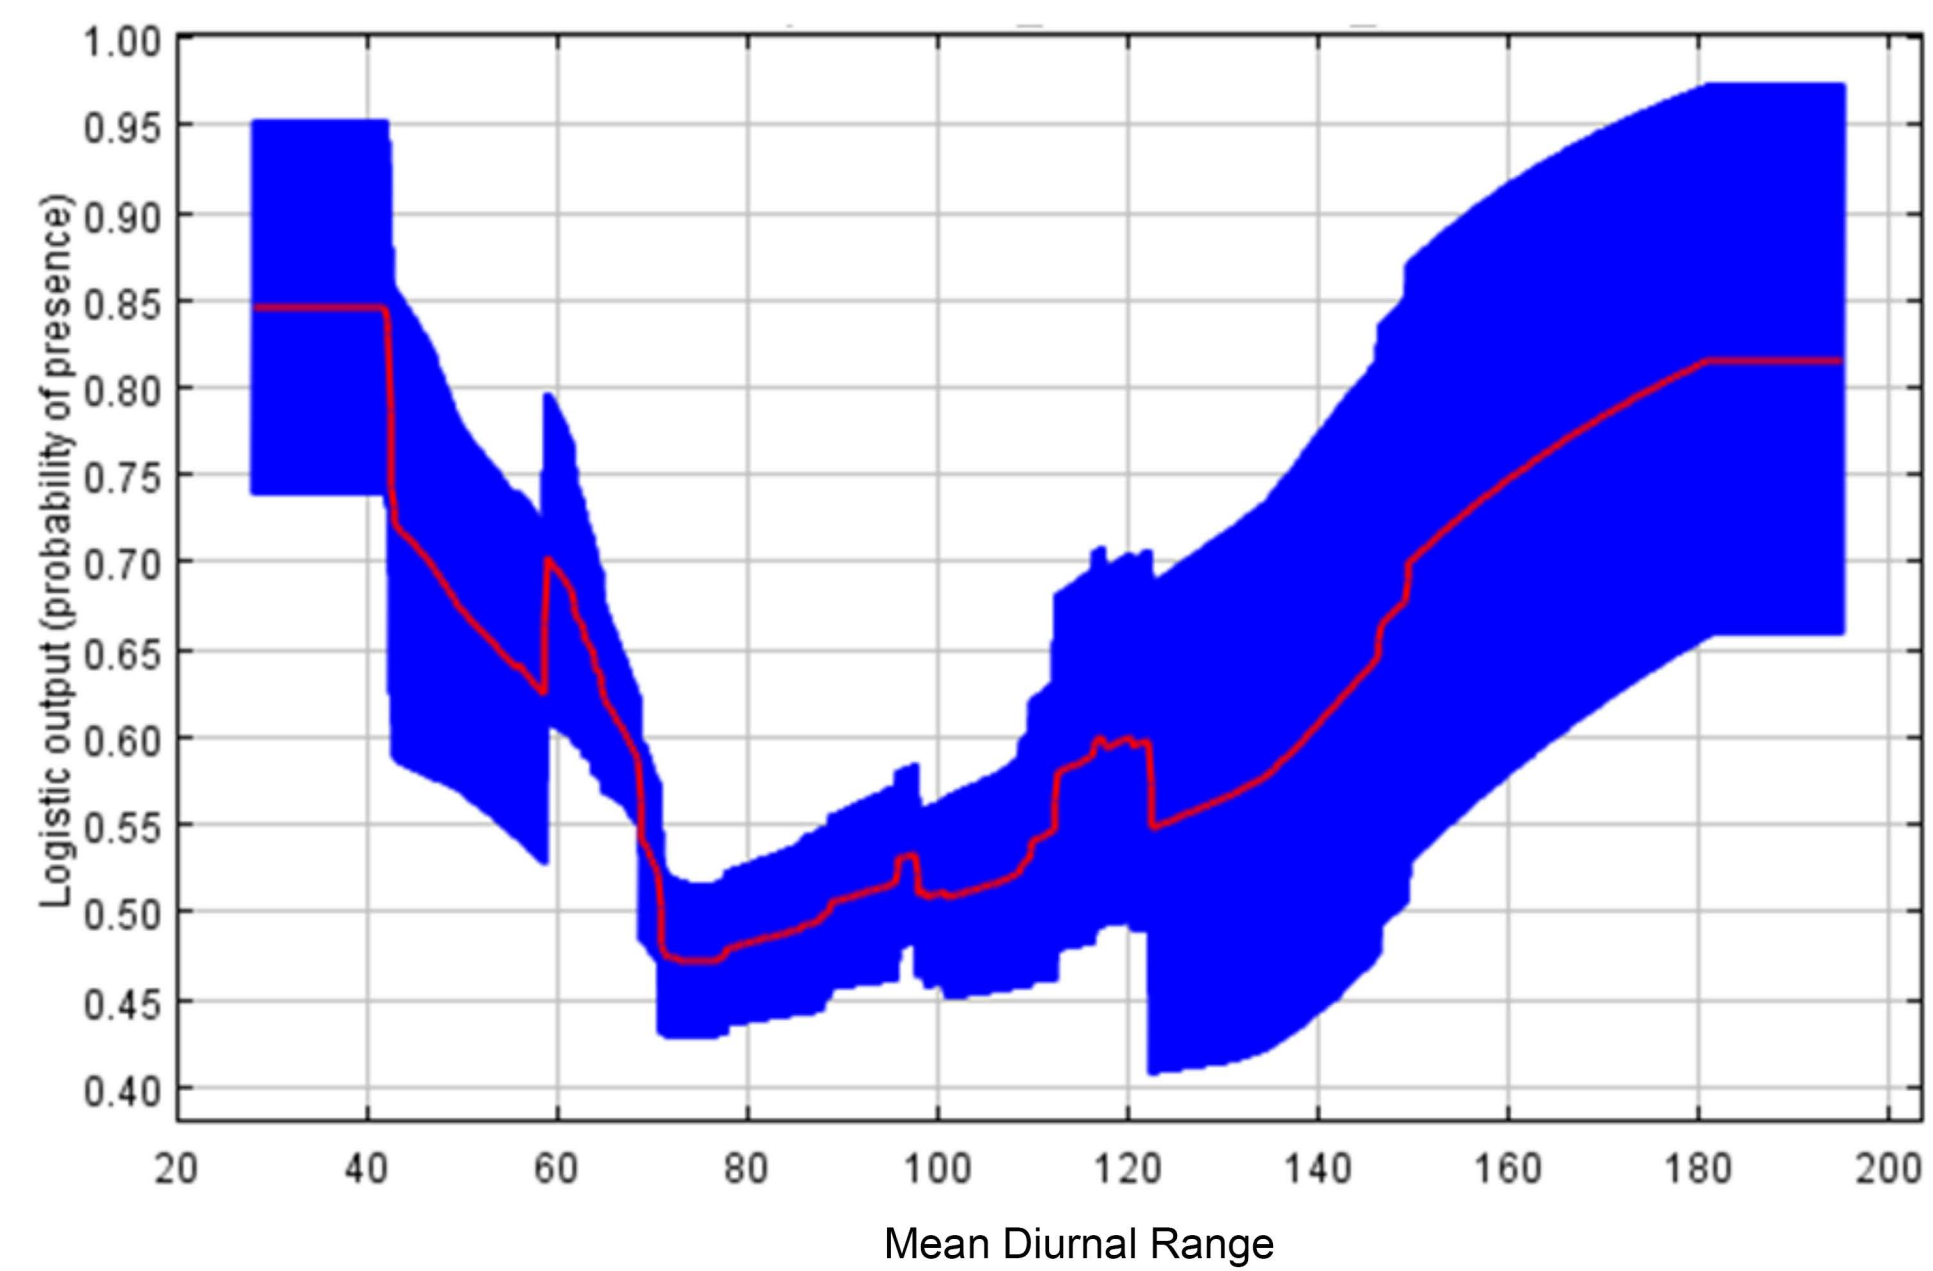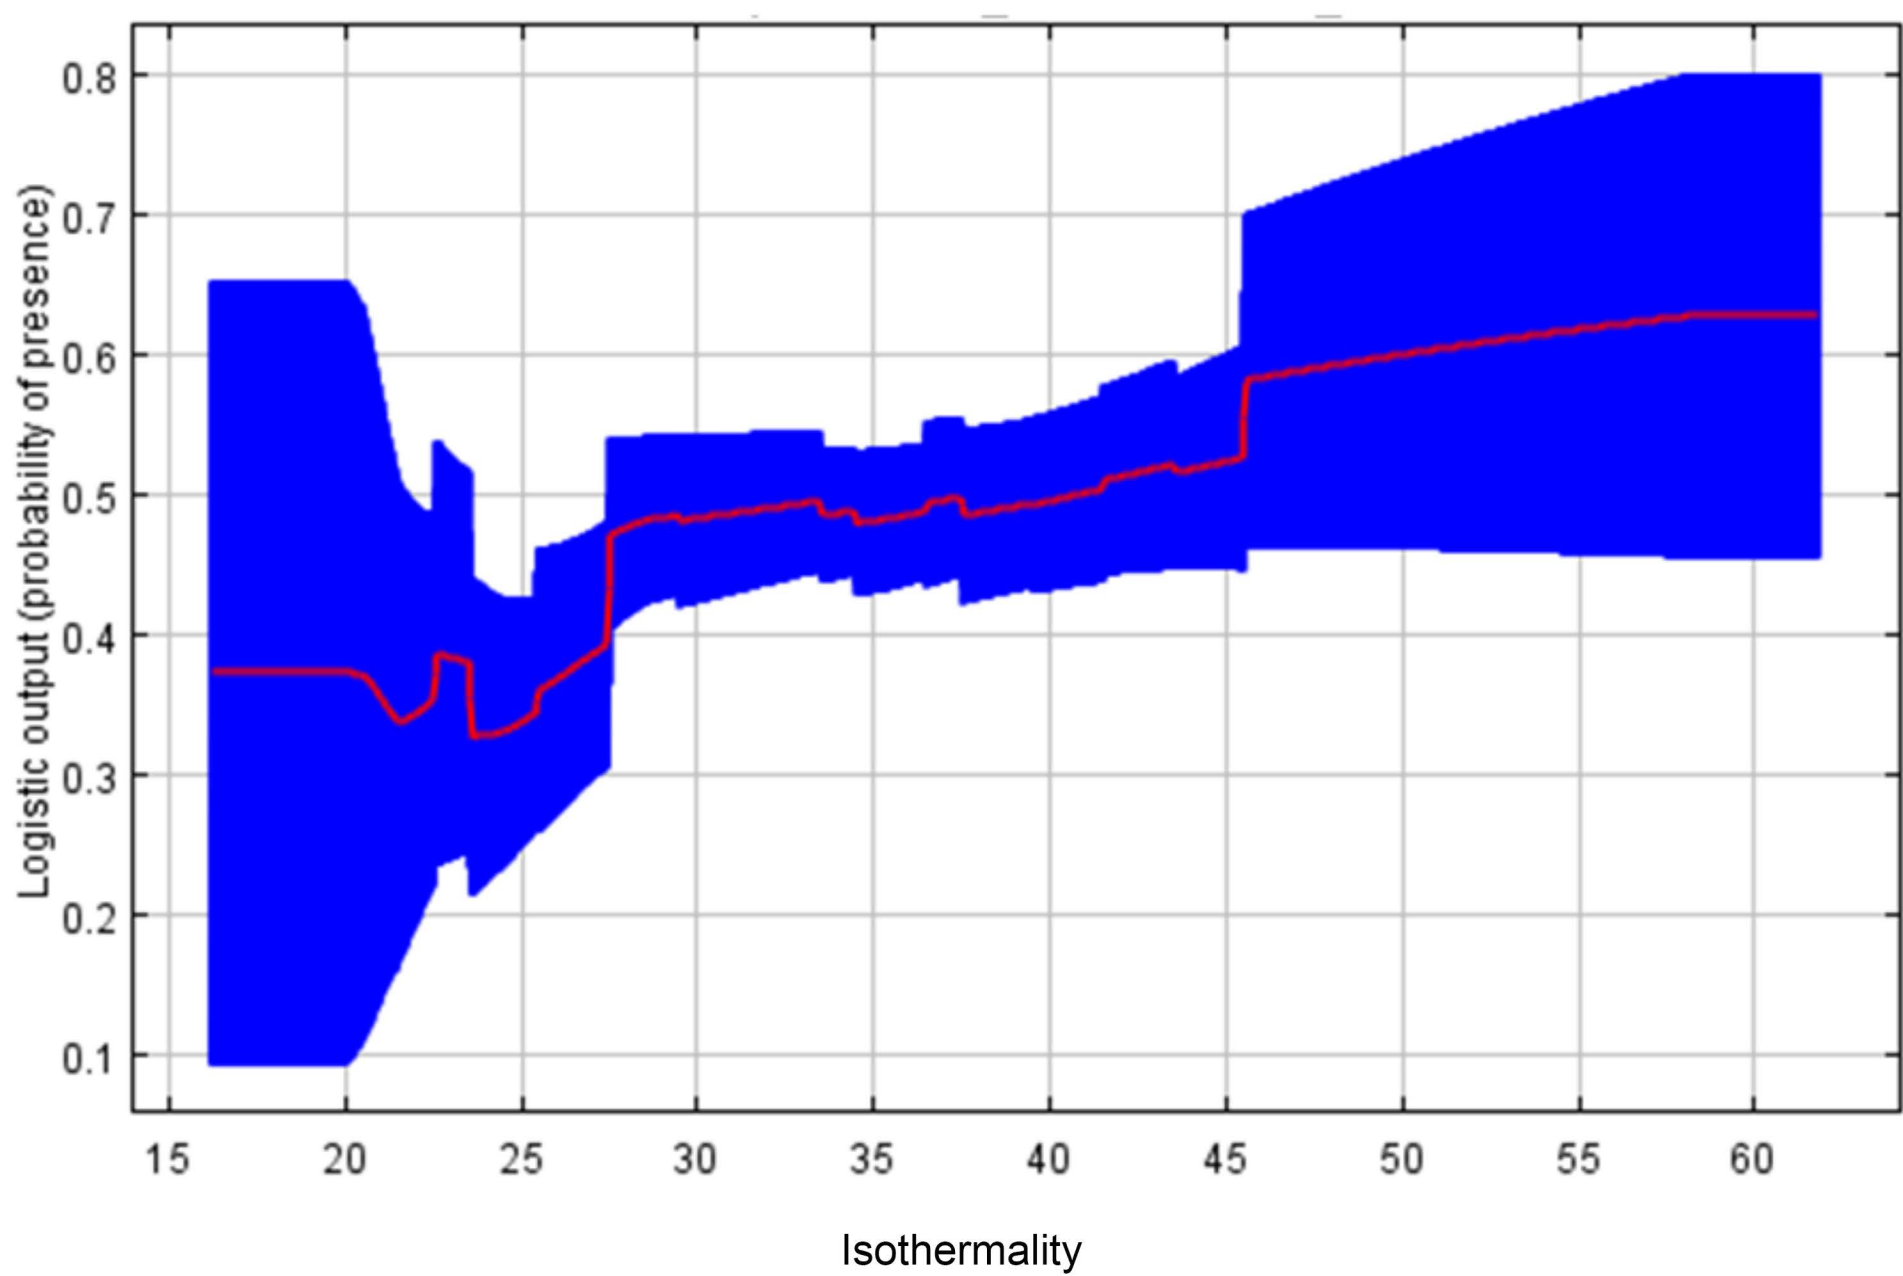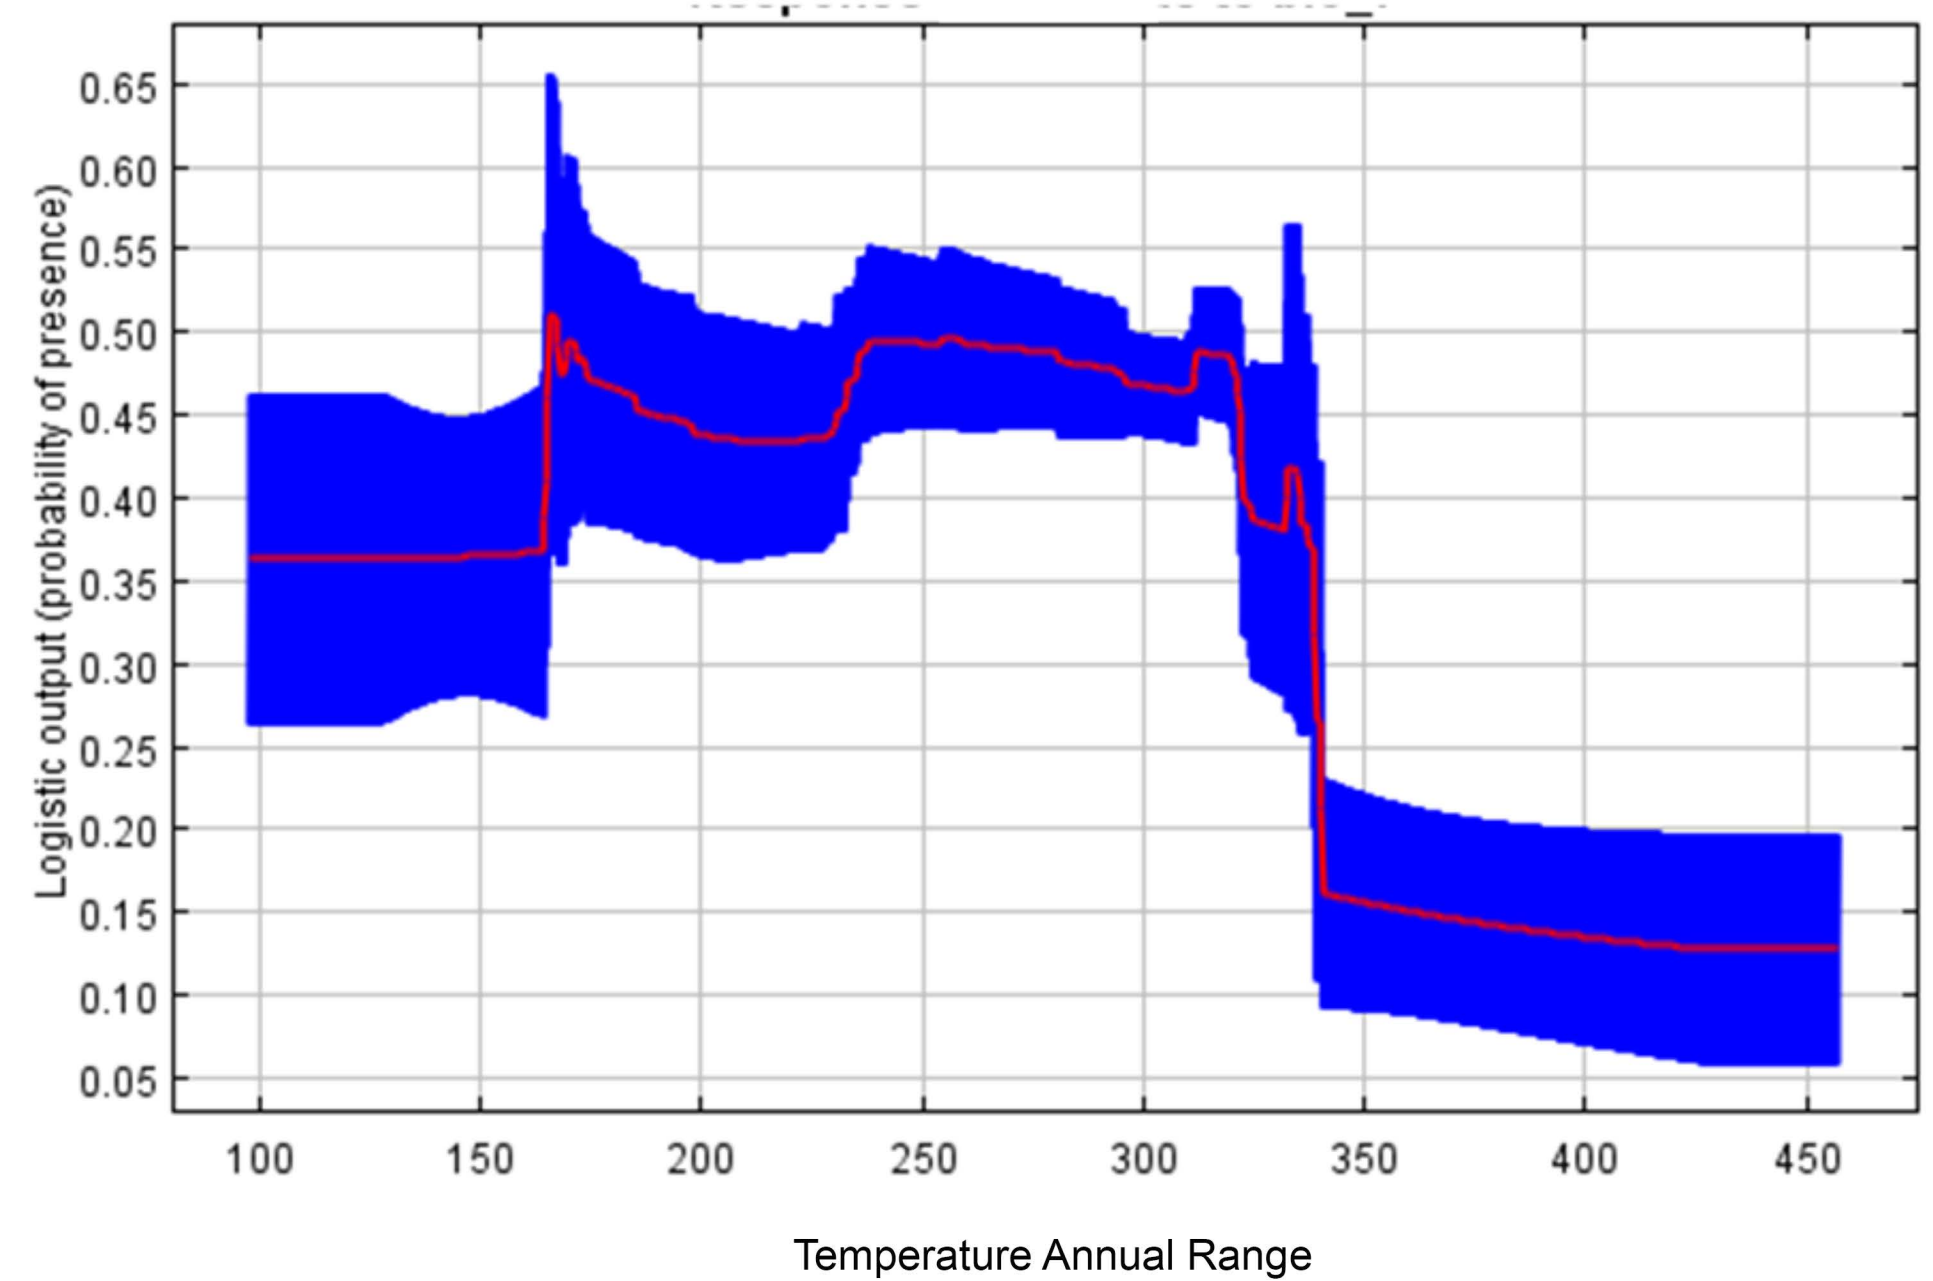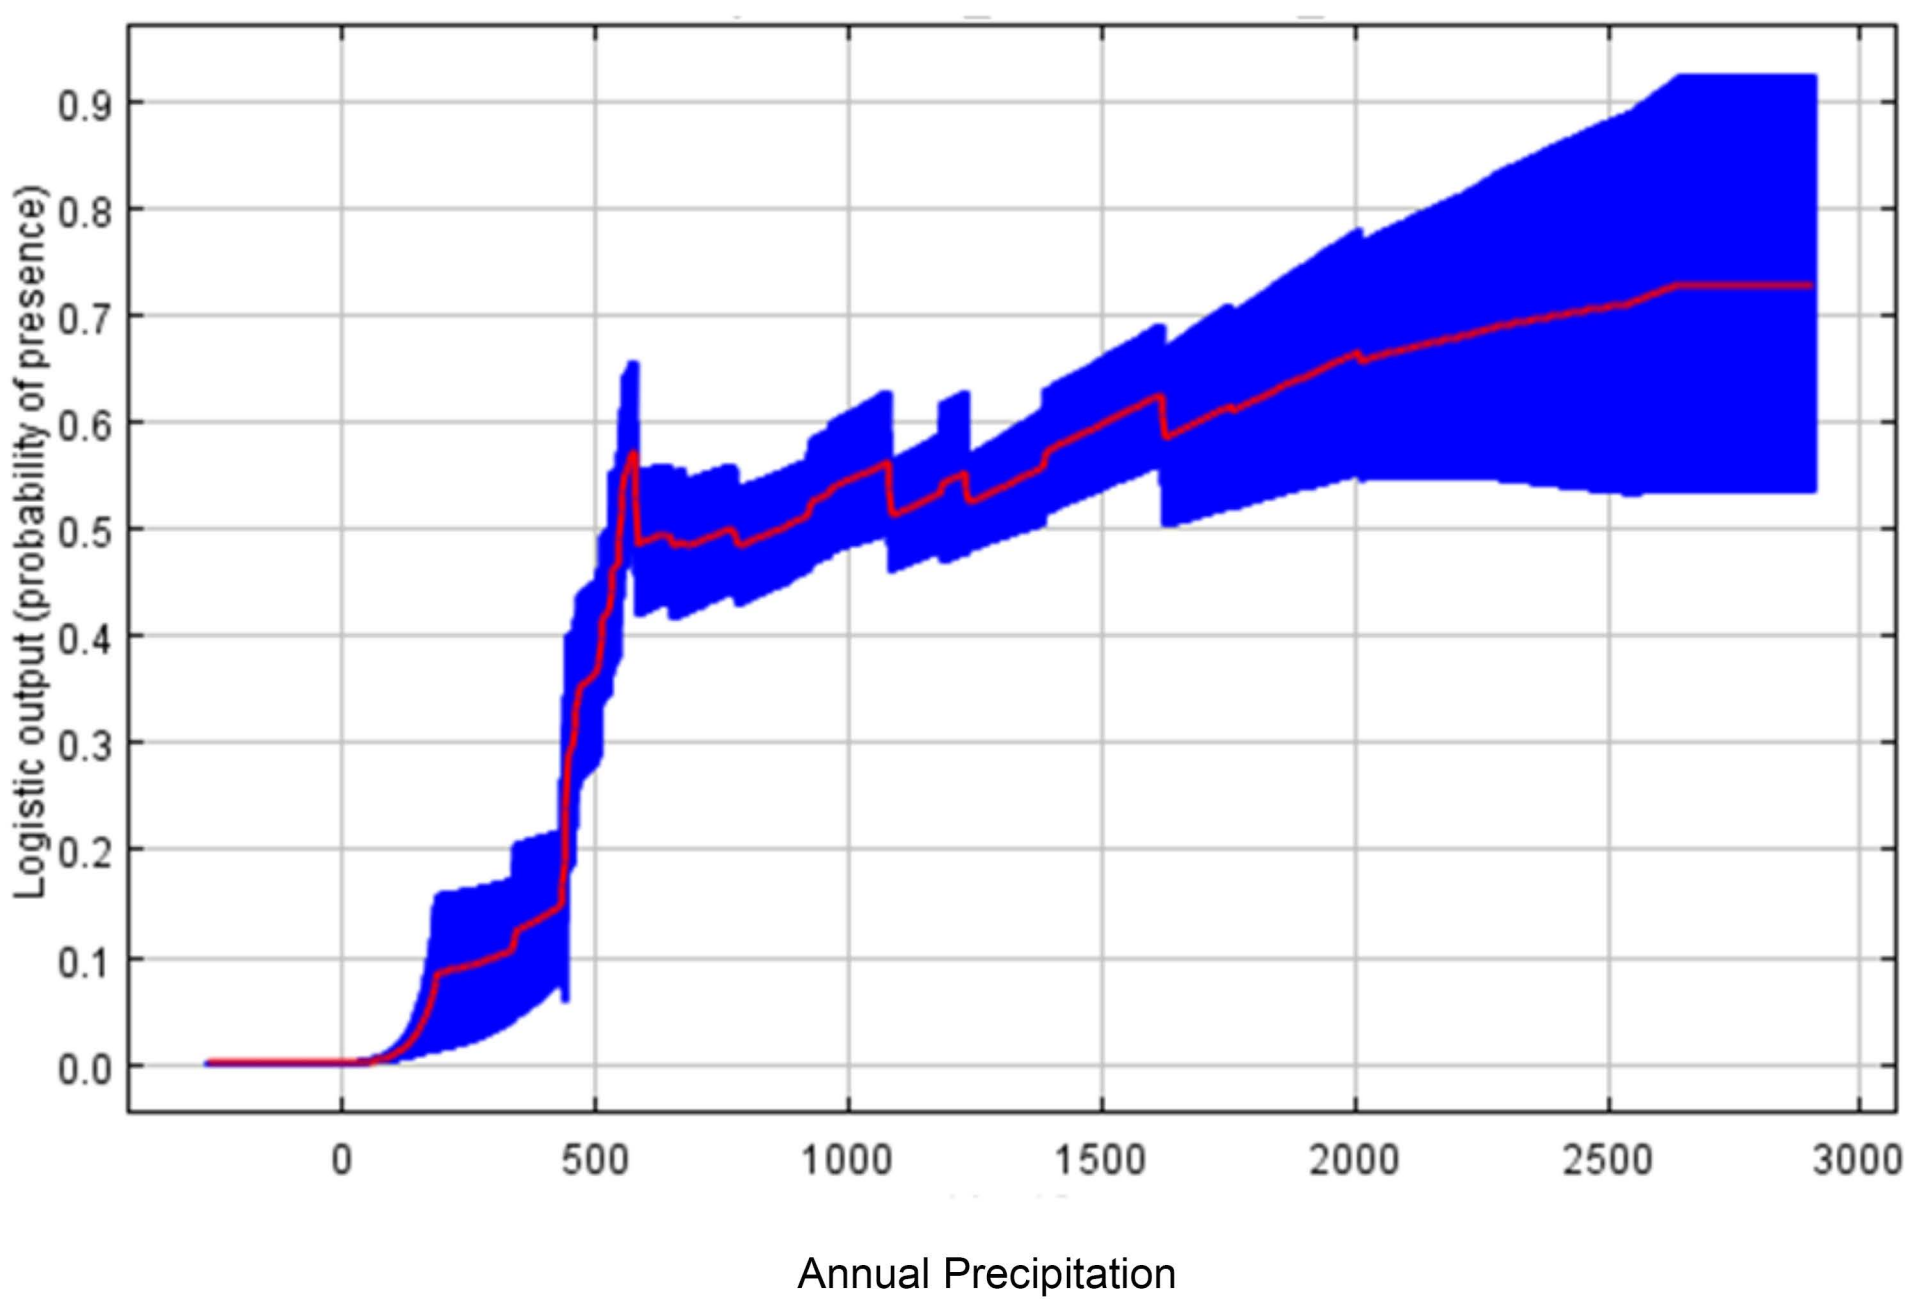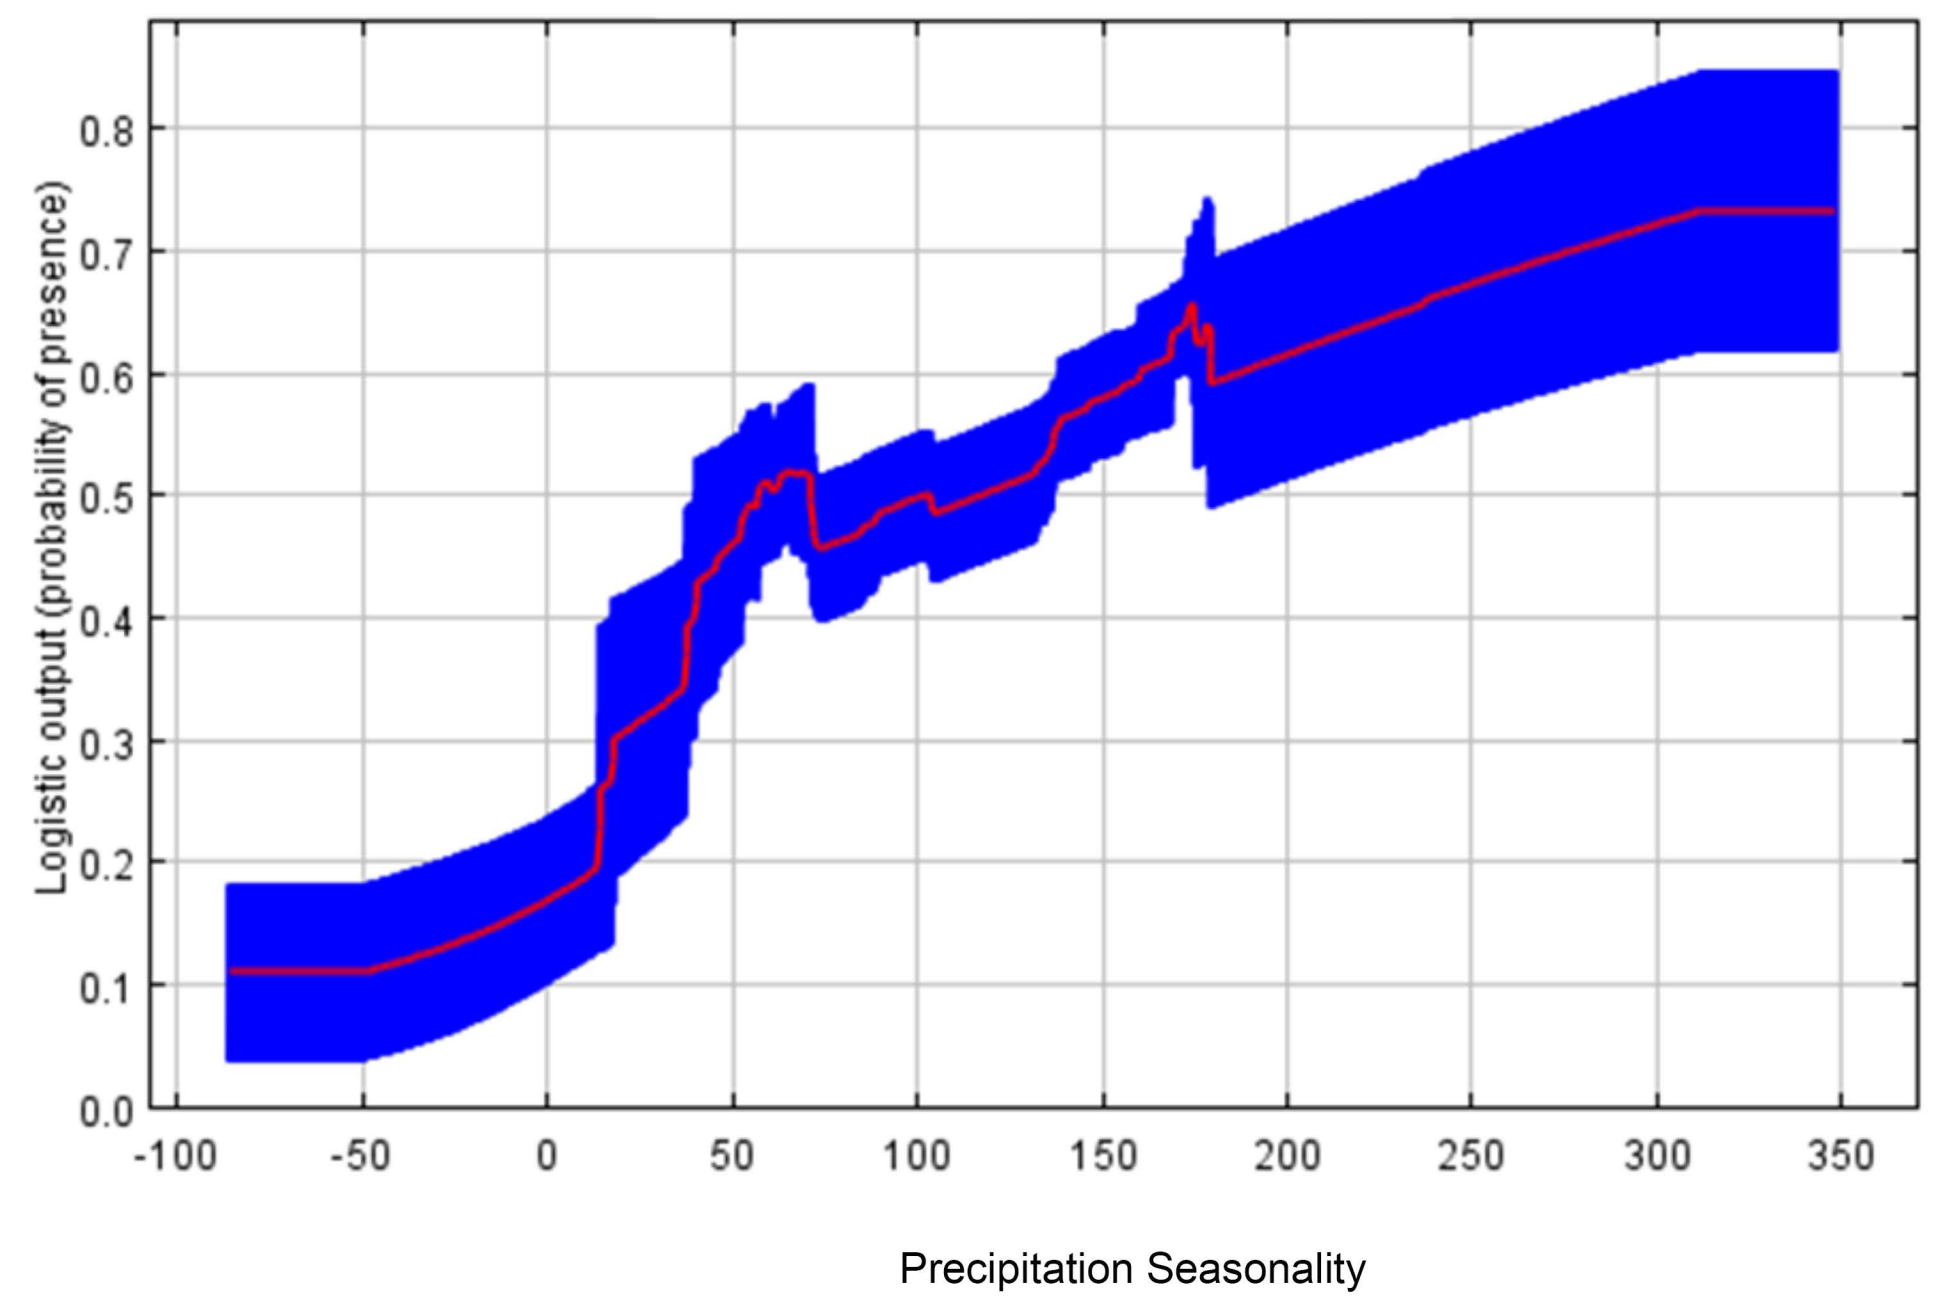



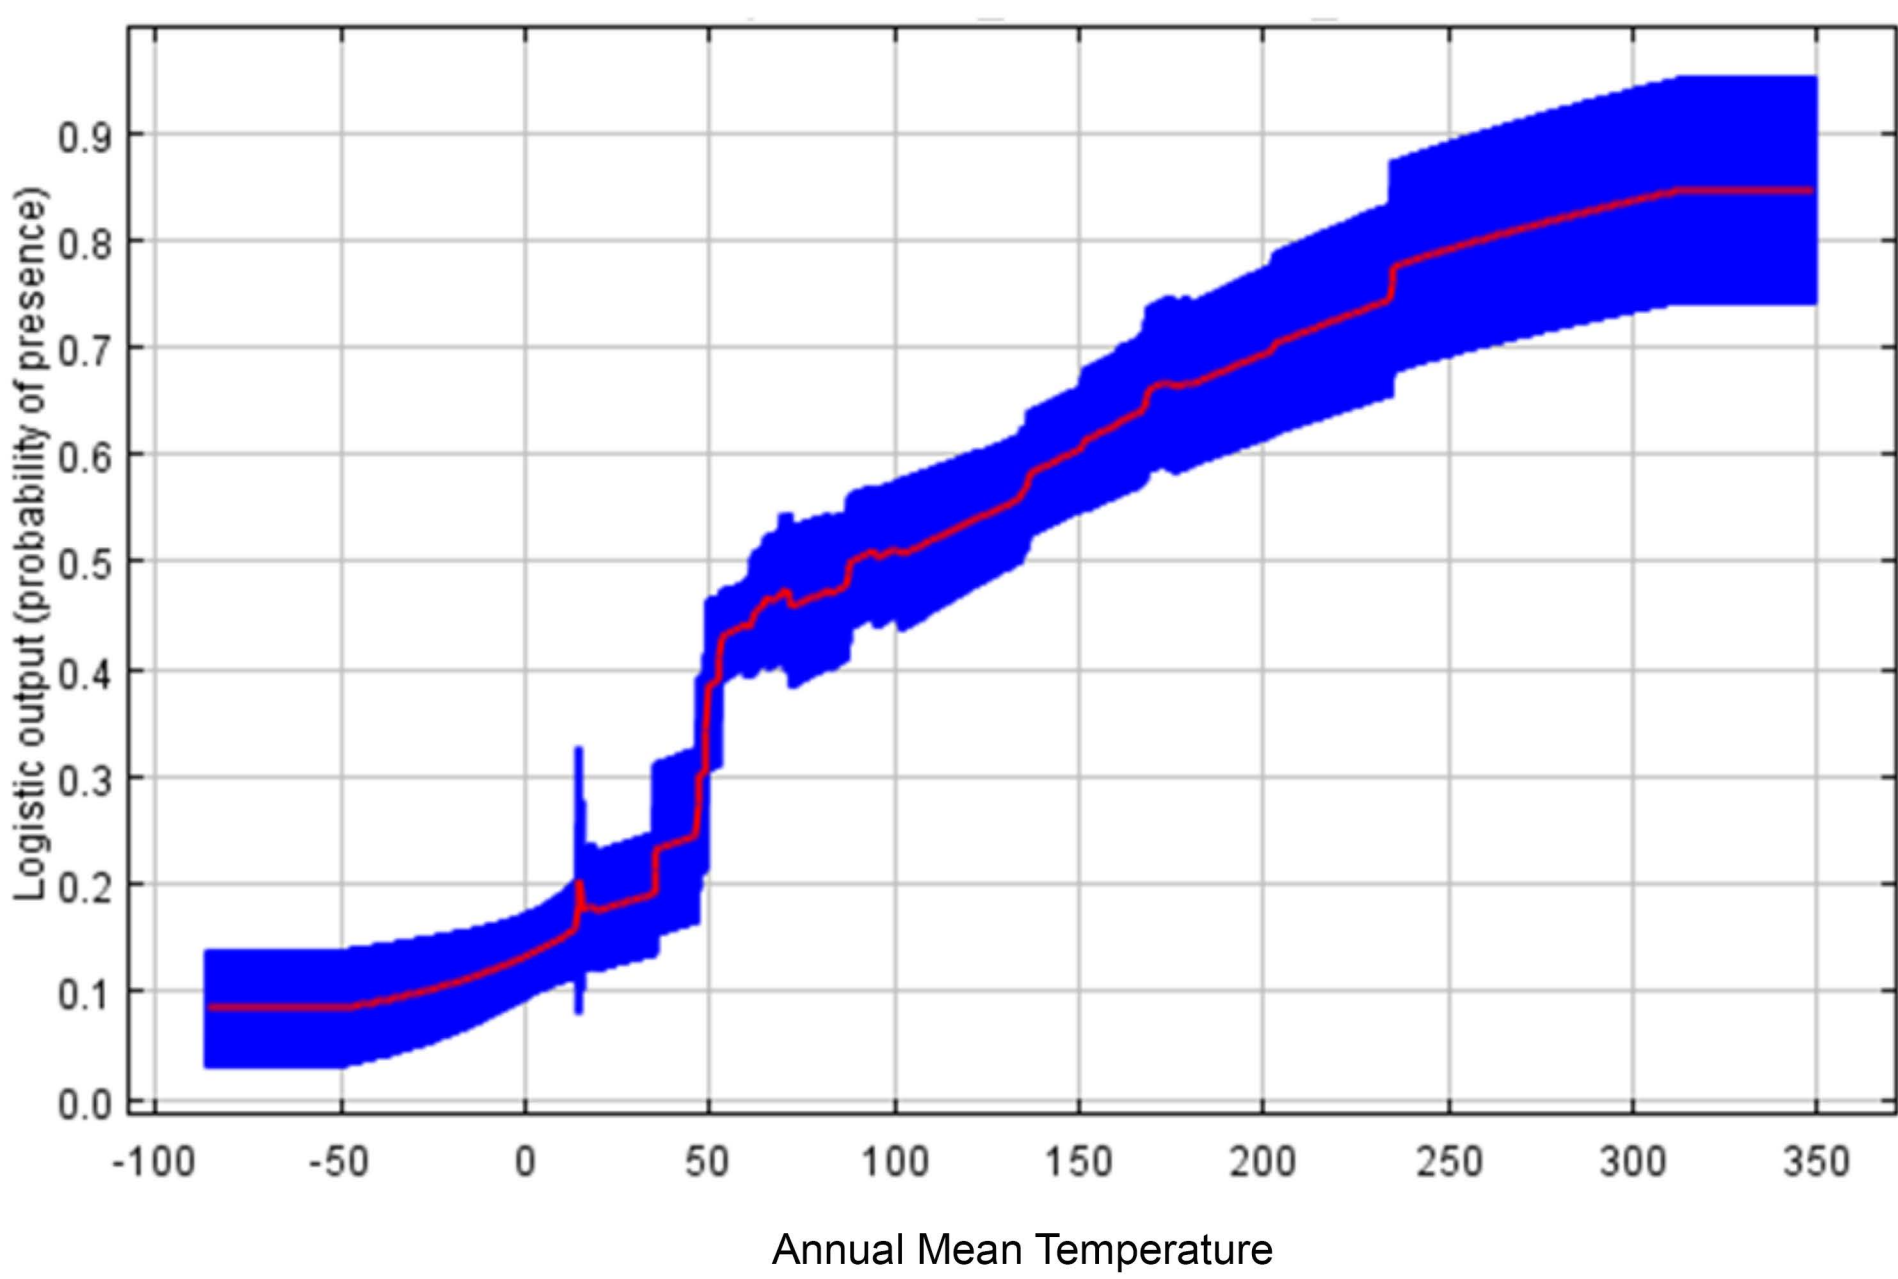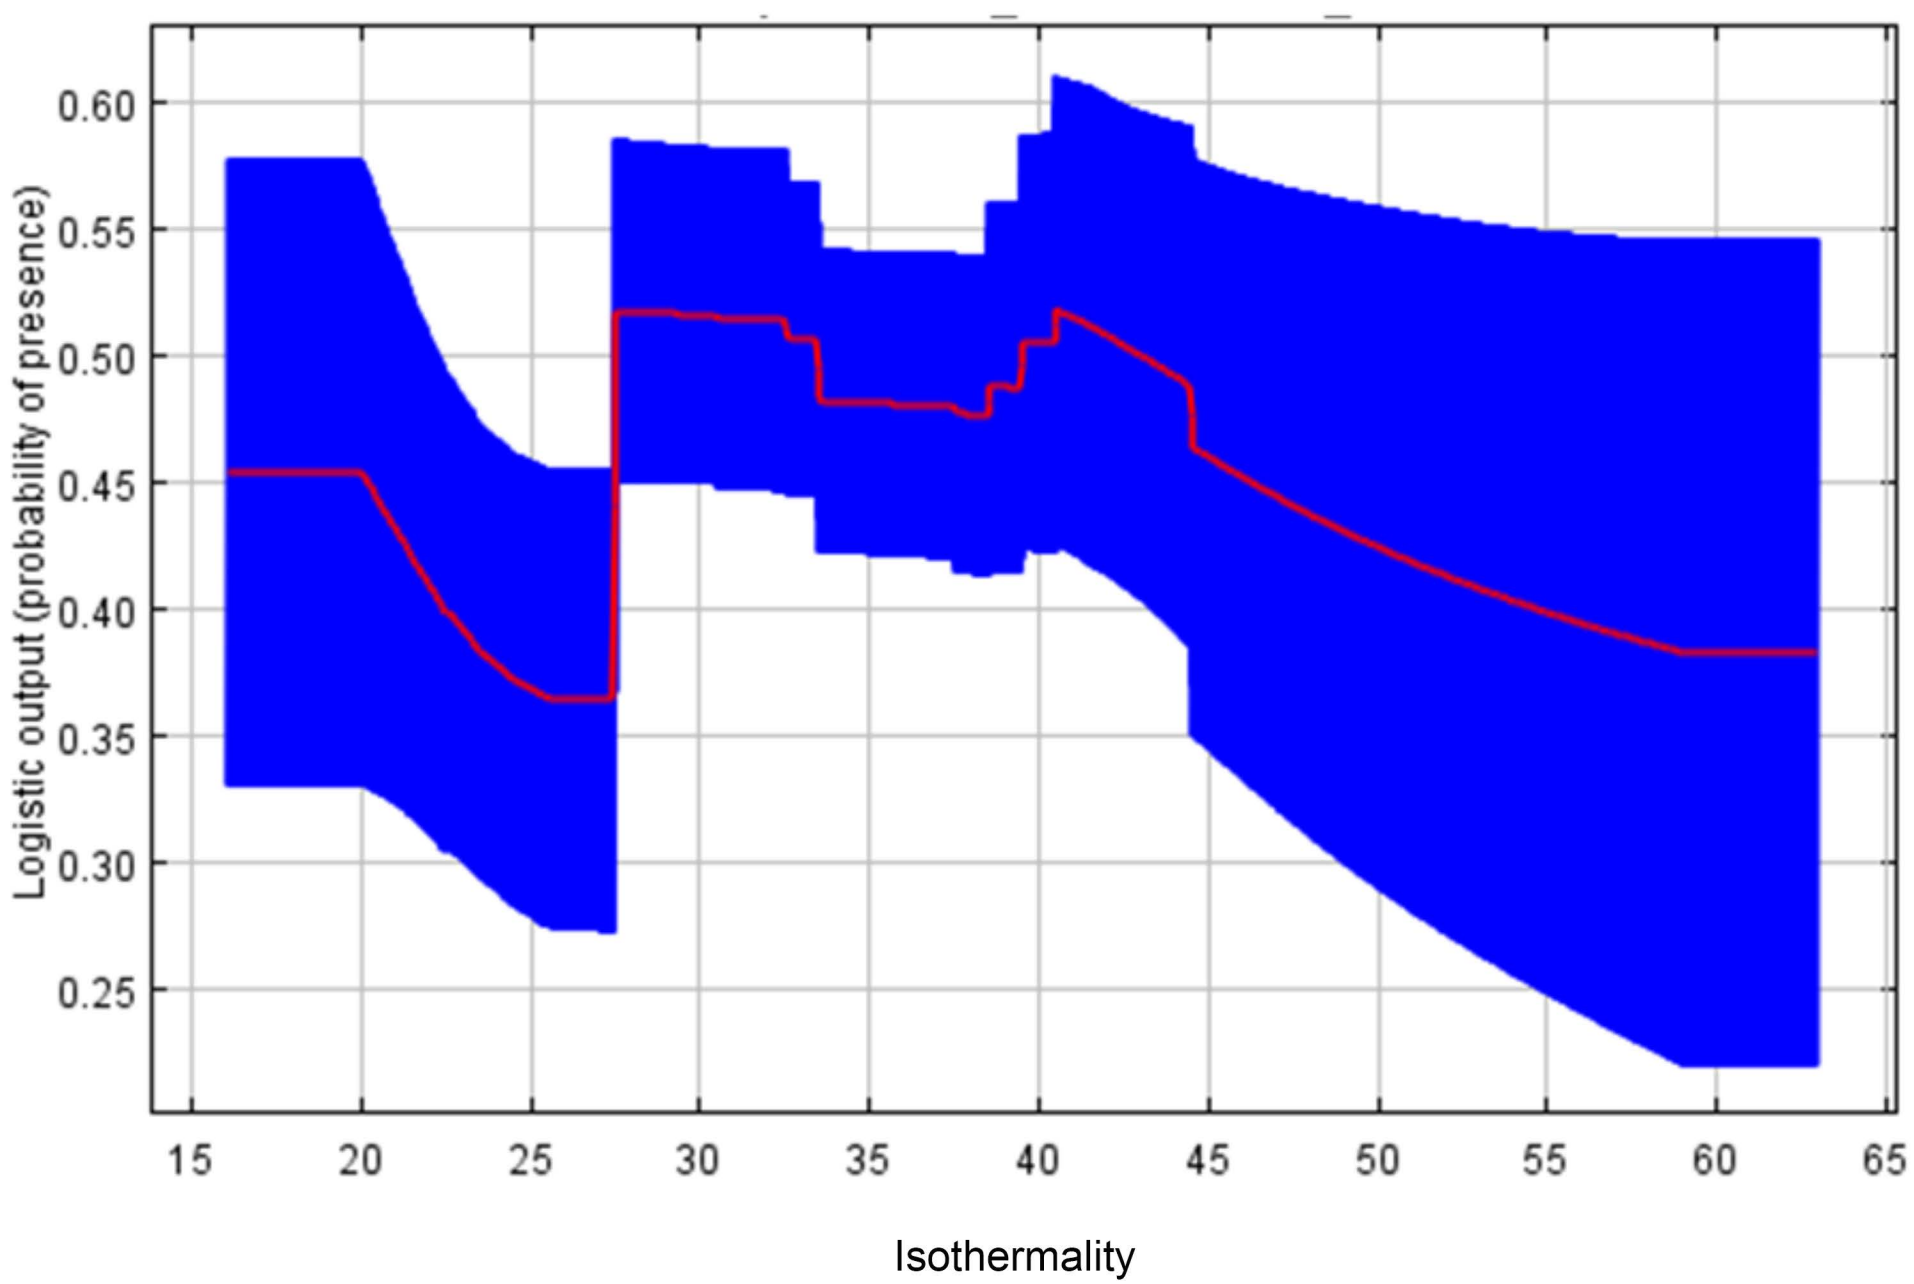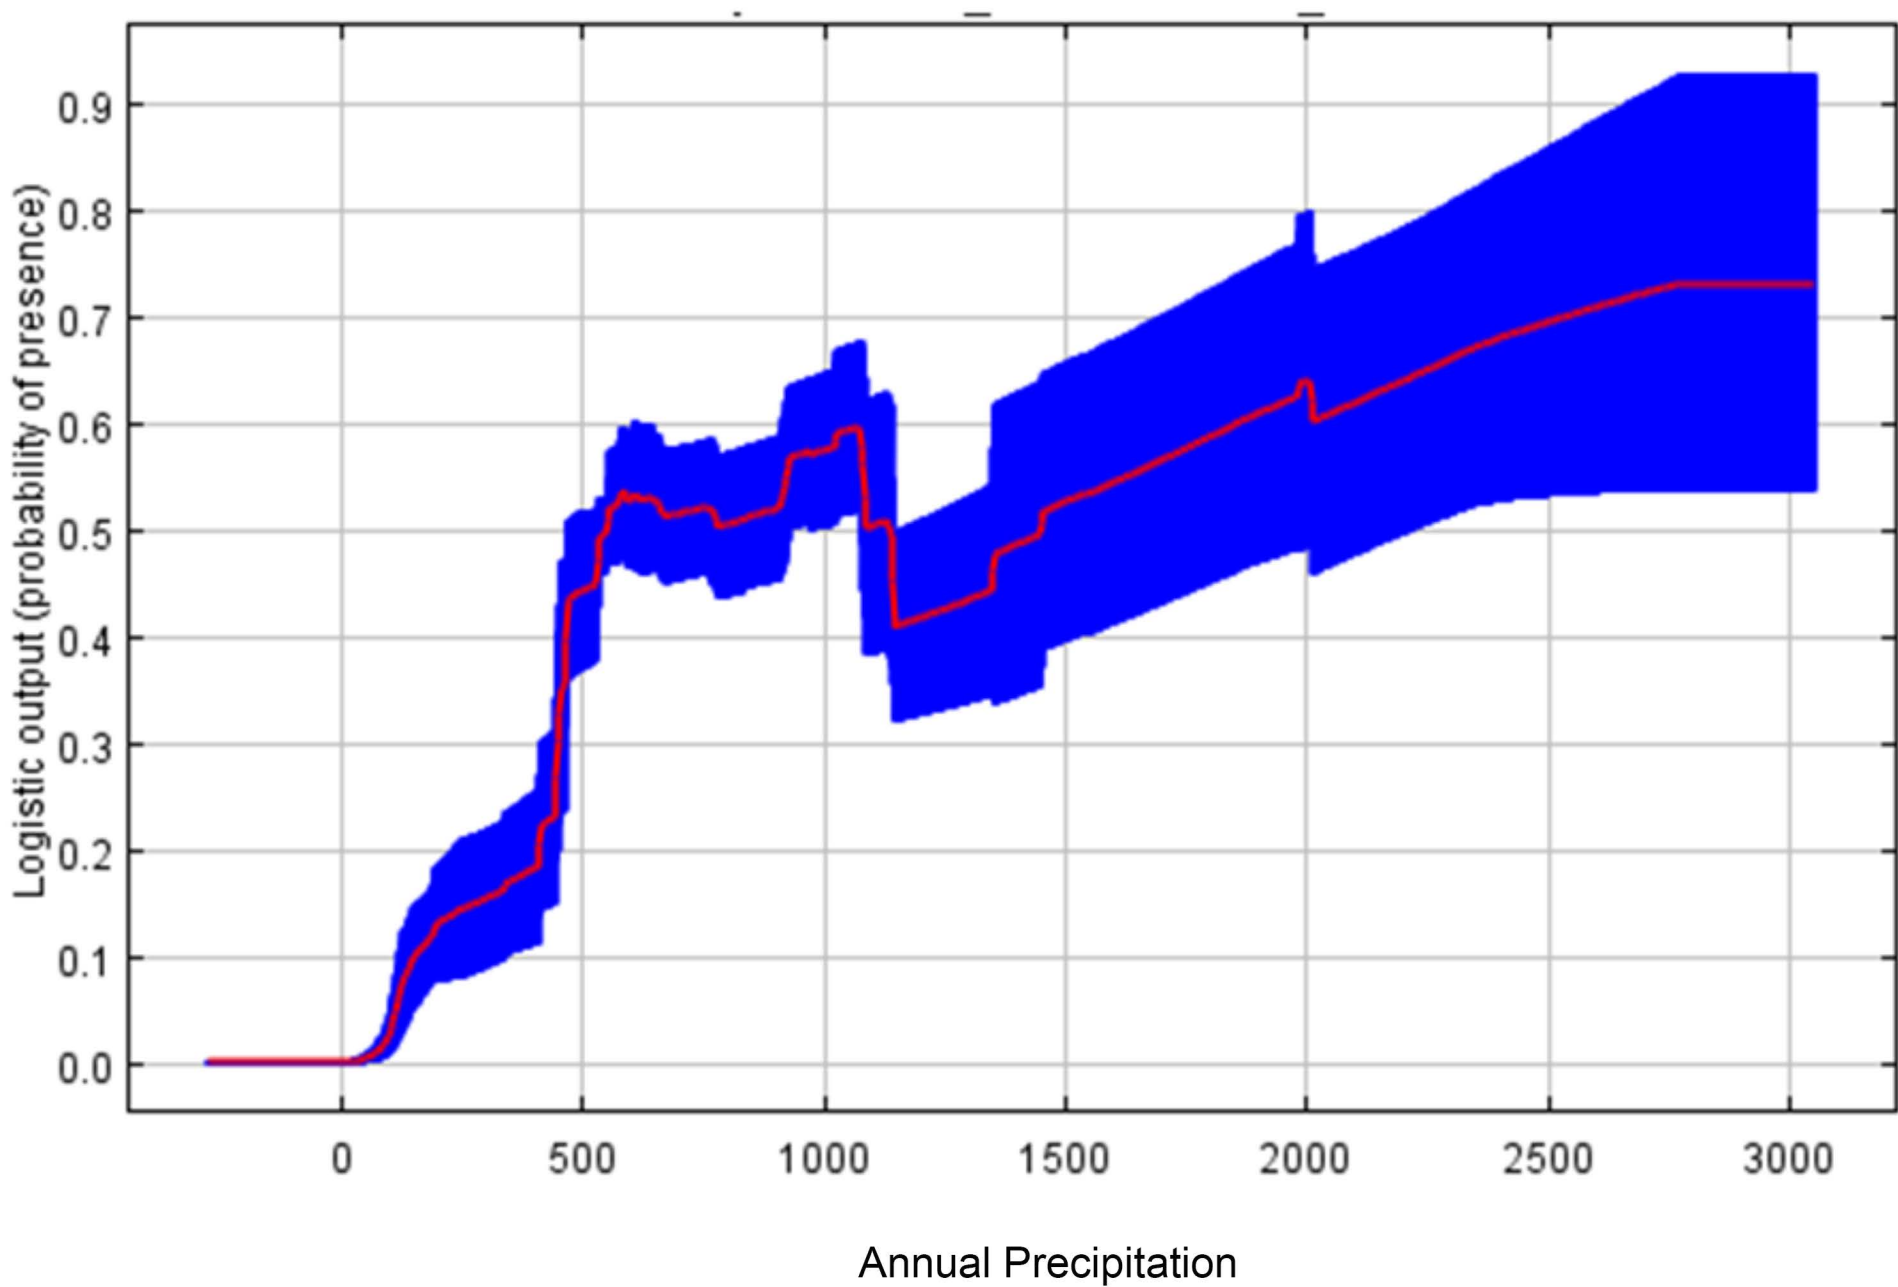

(b)

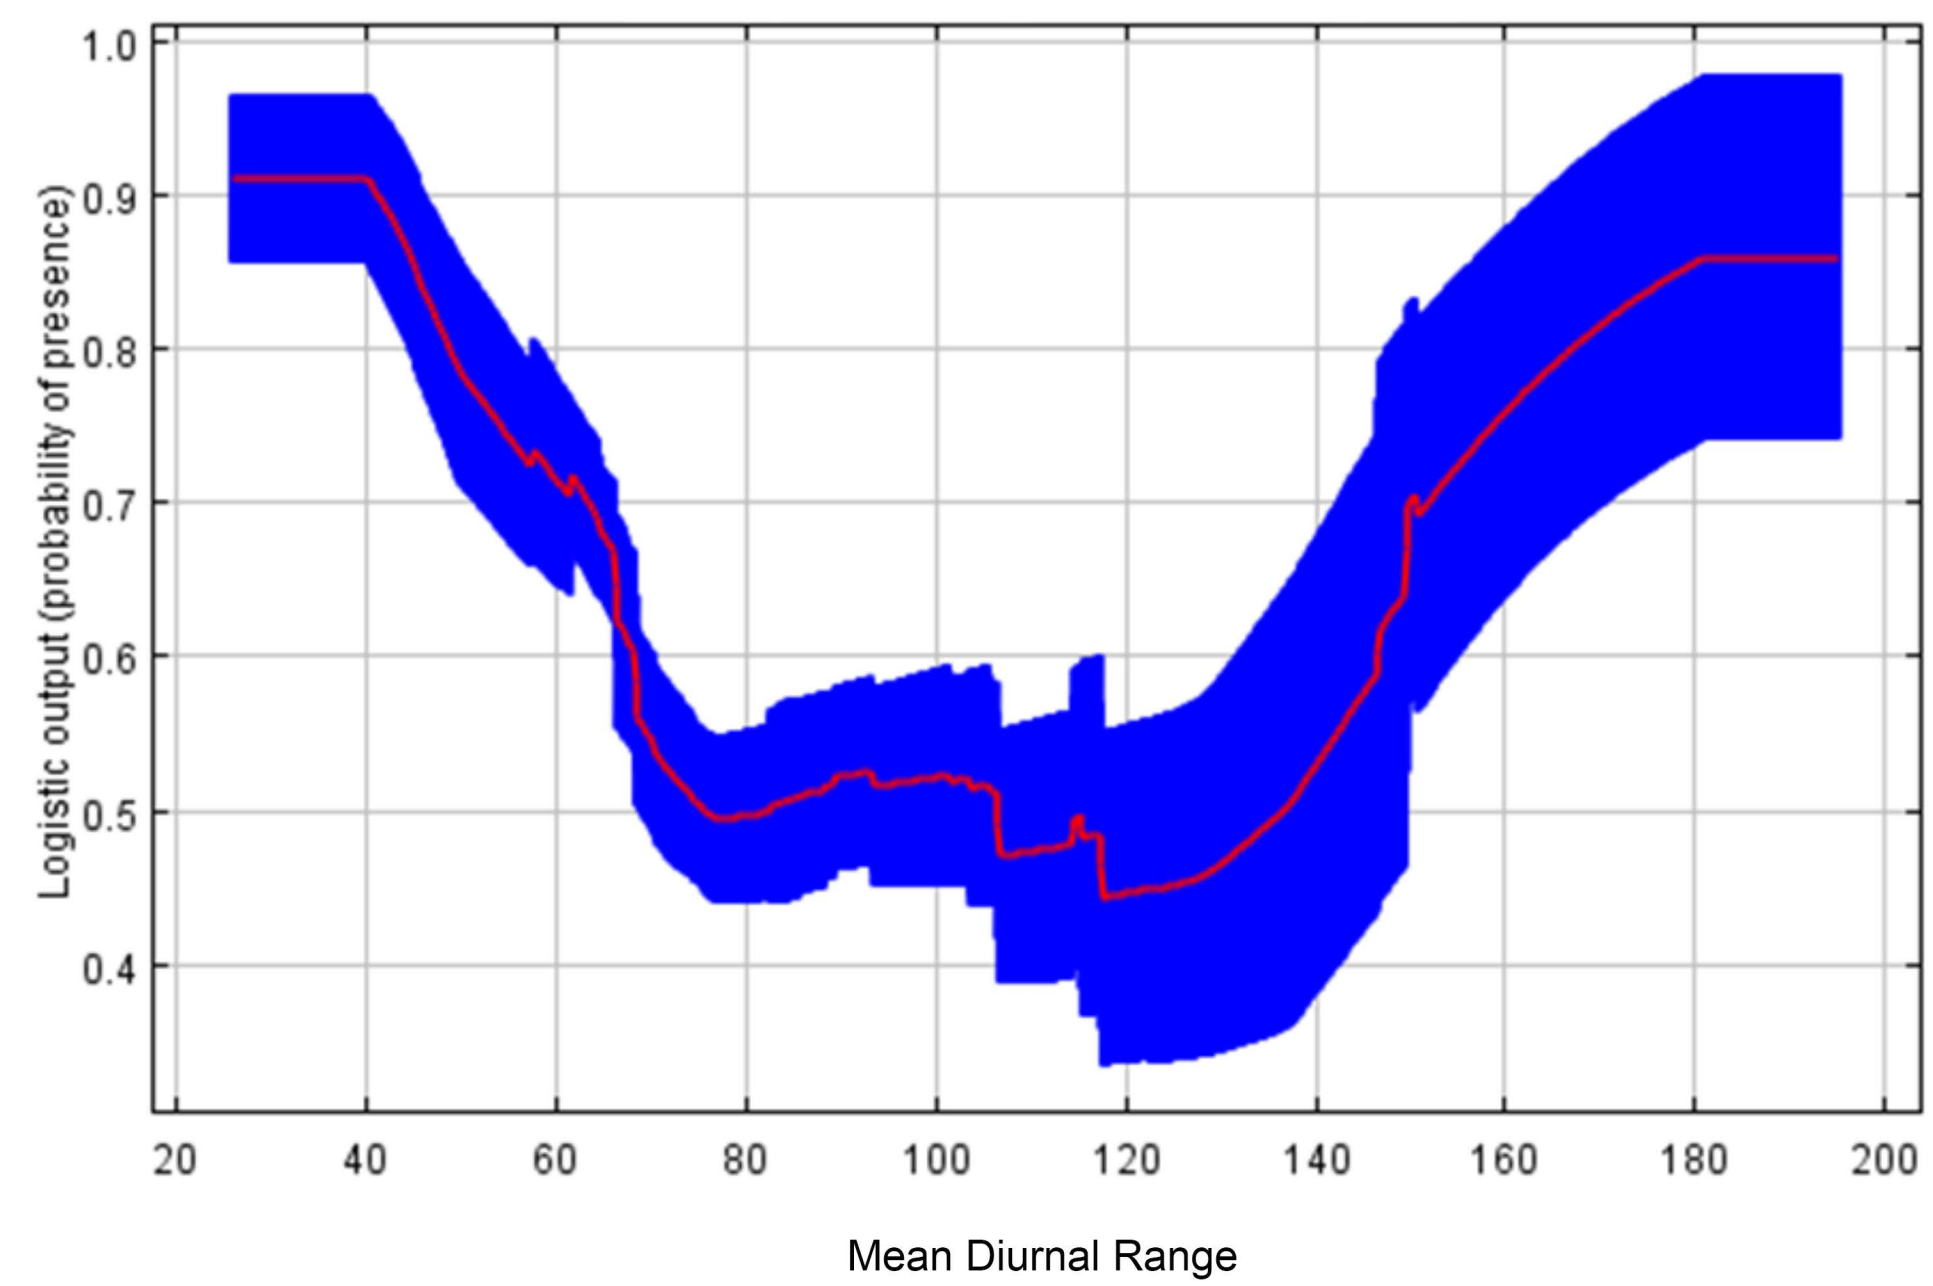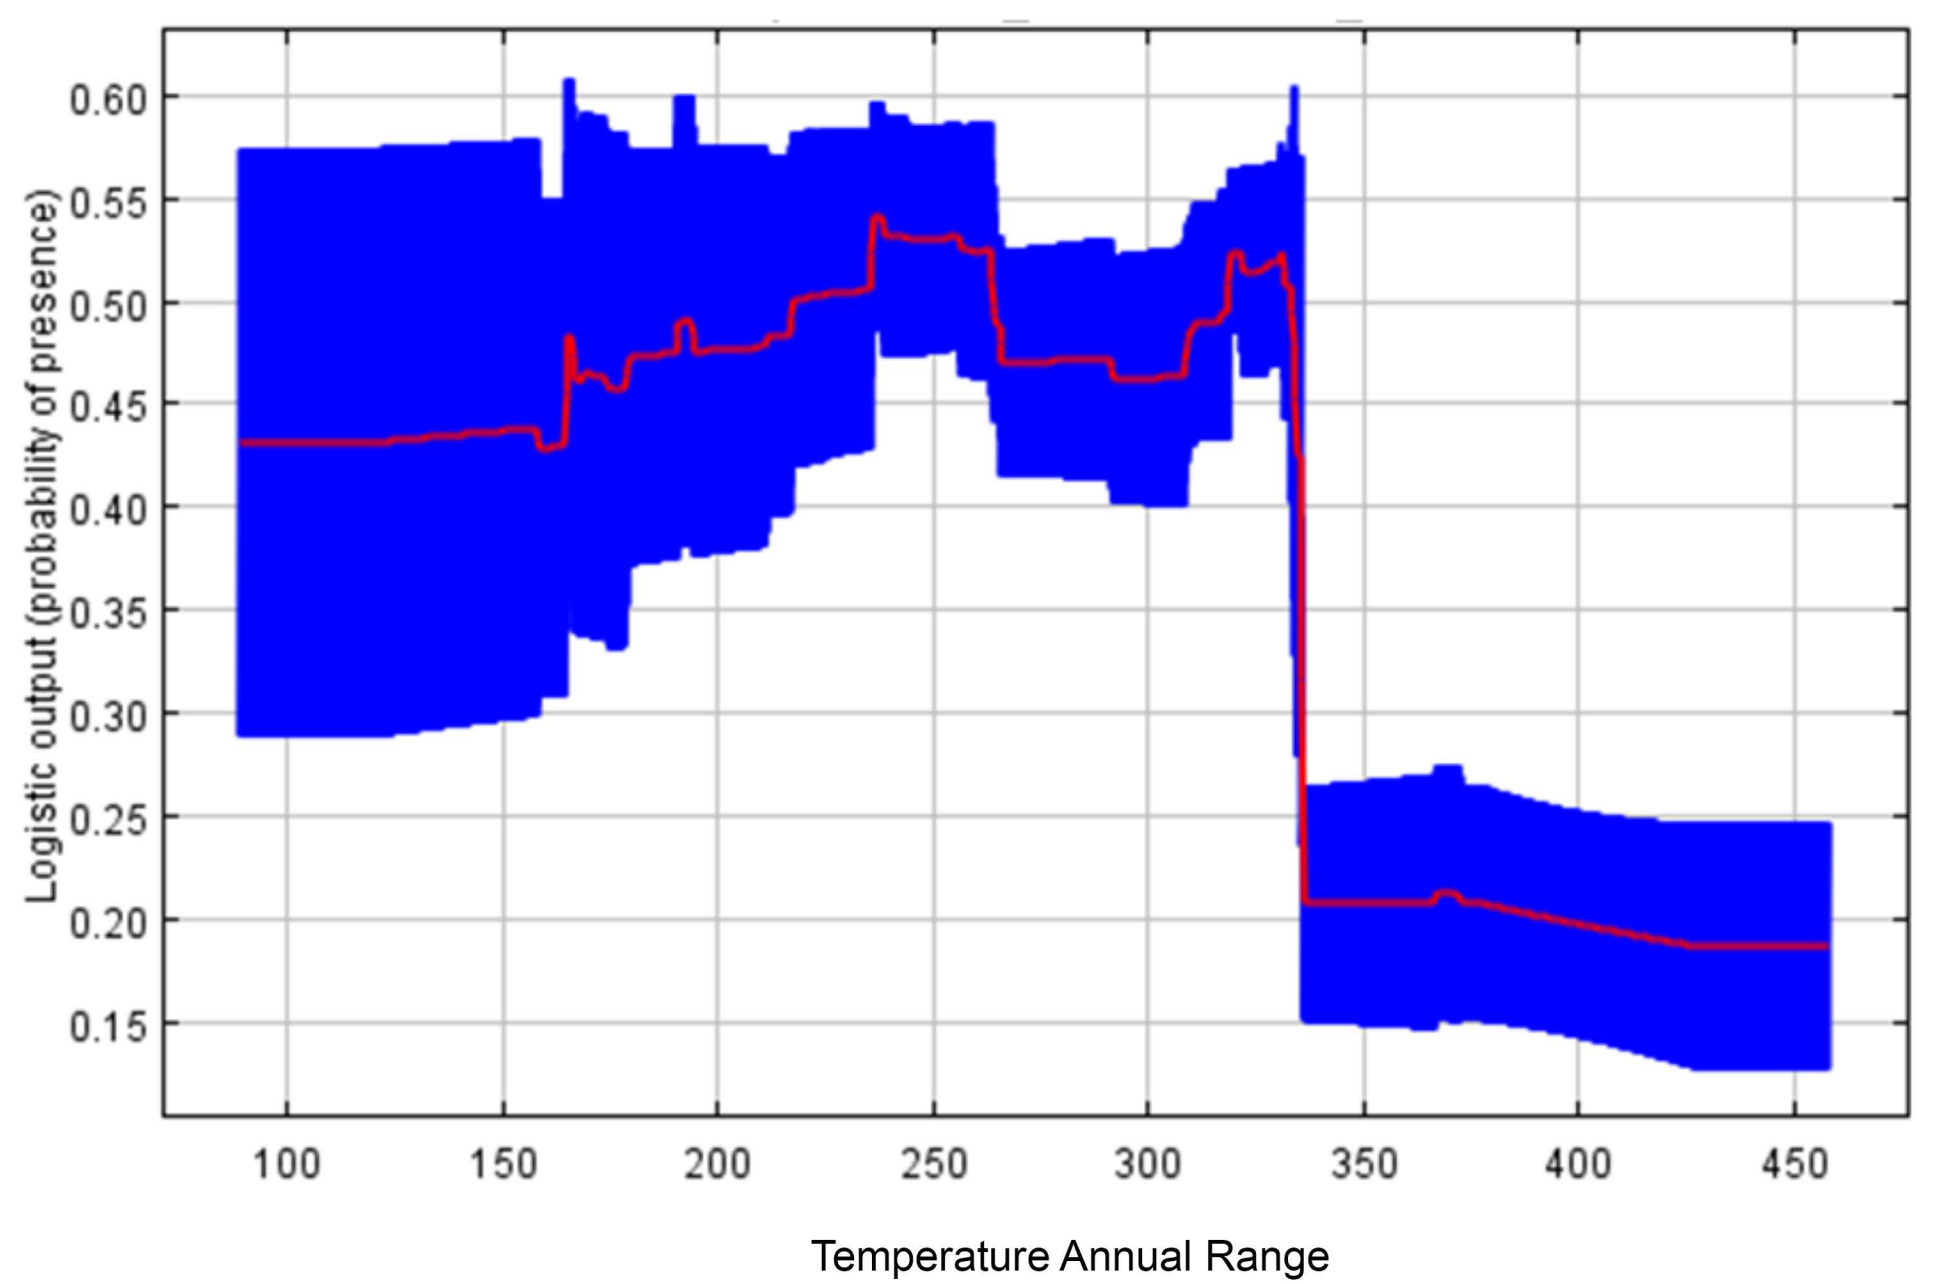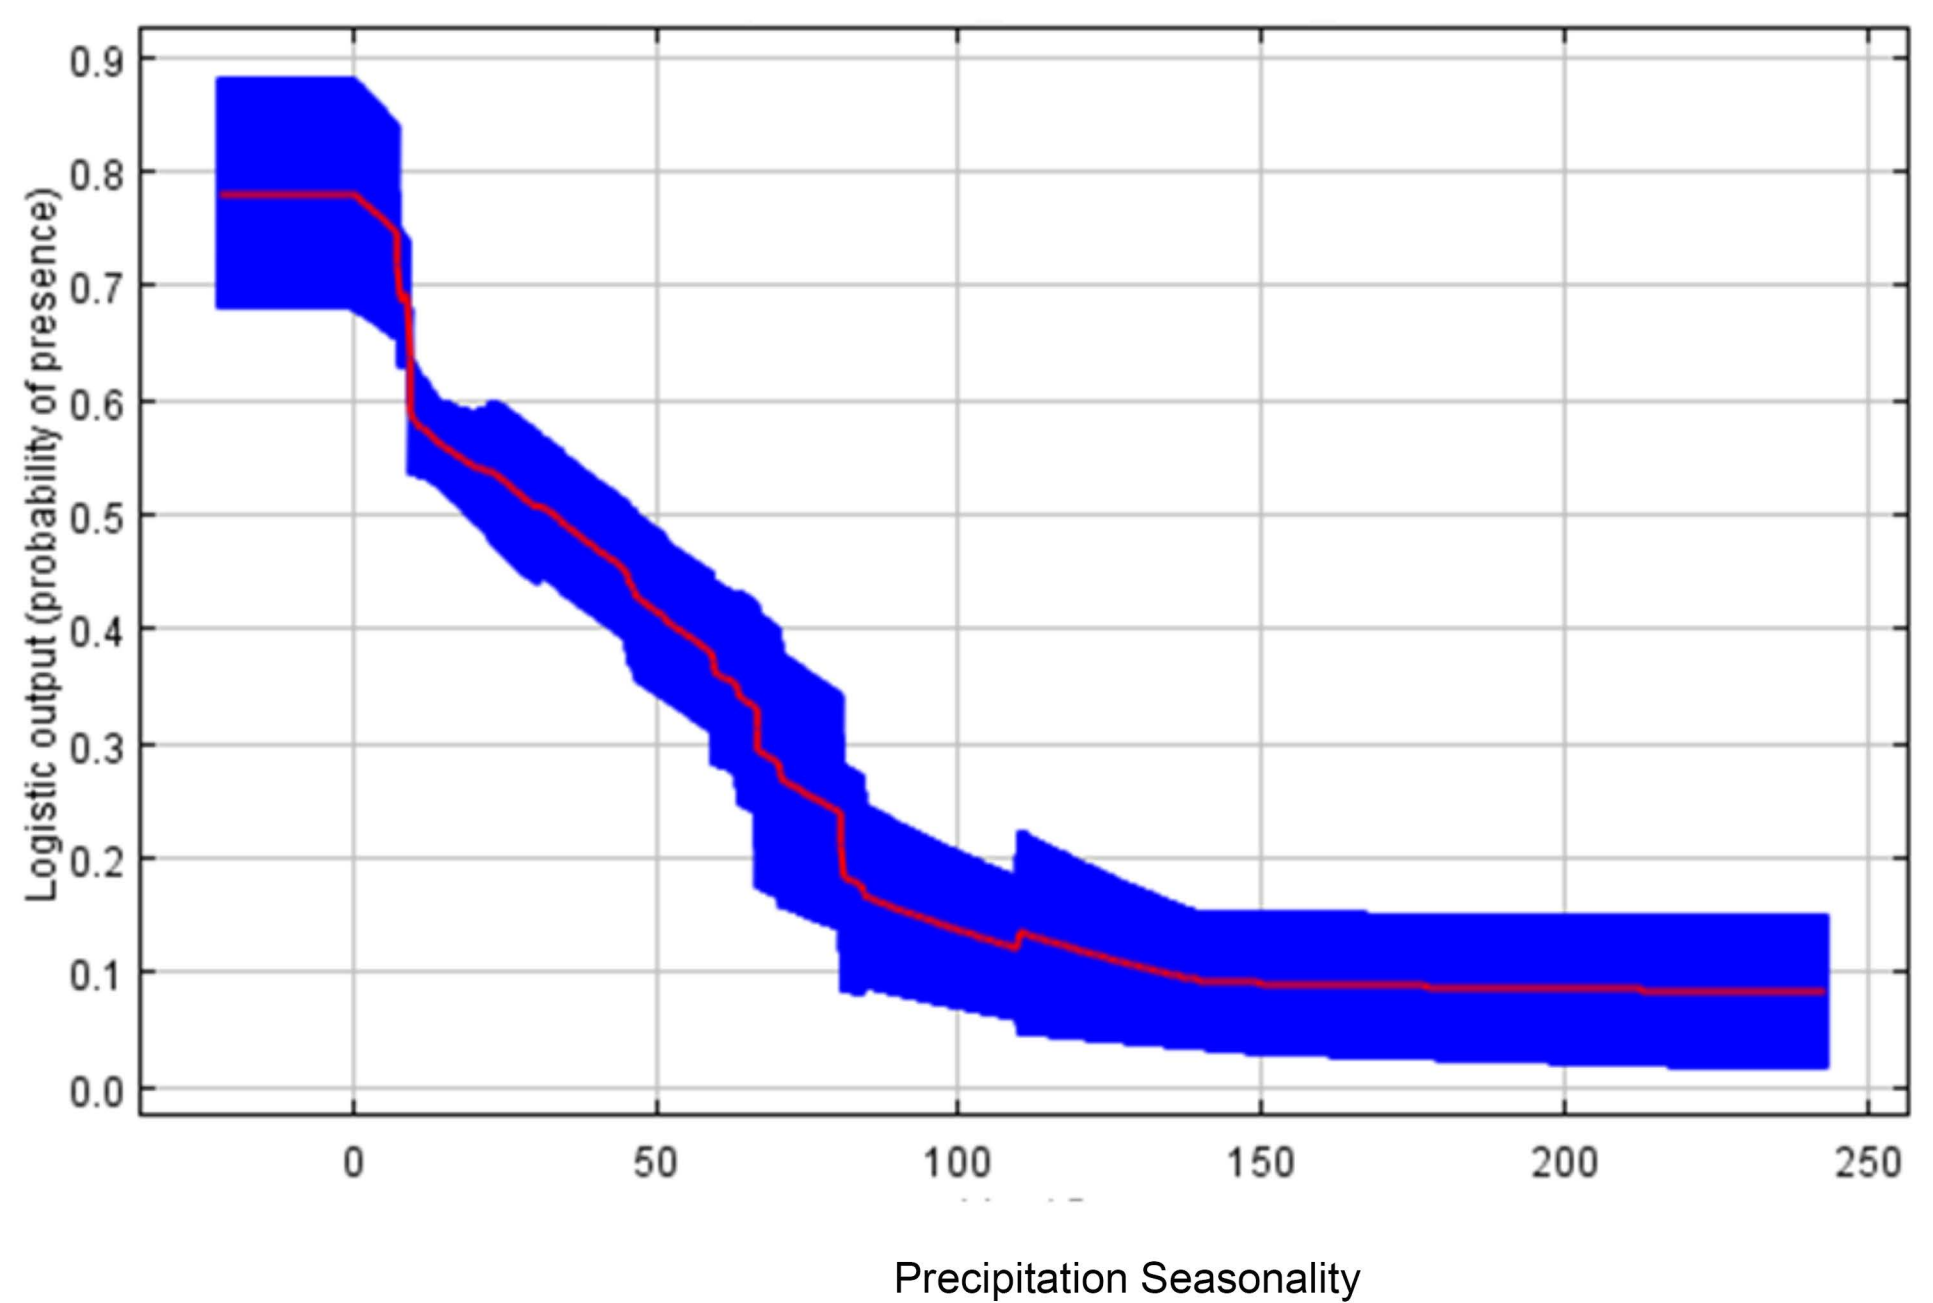



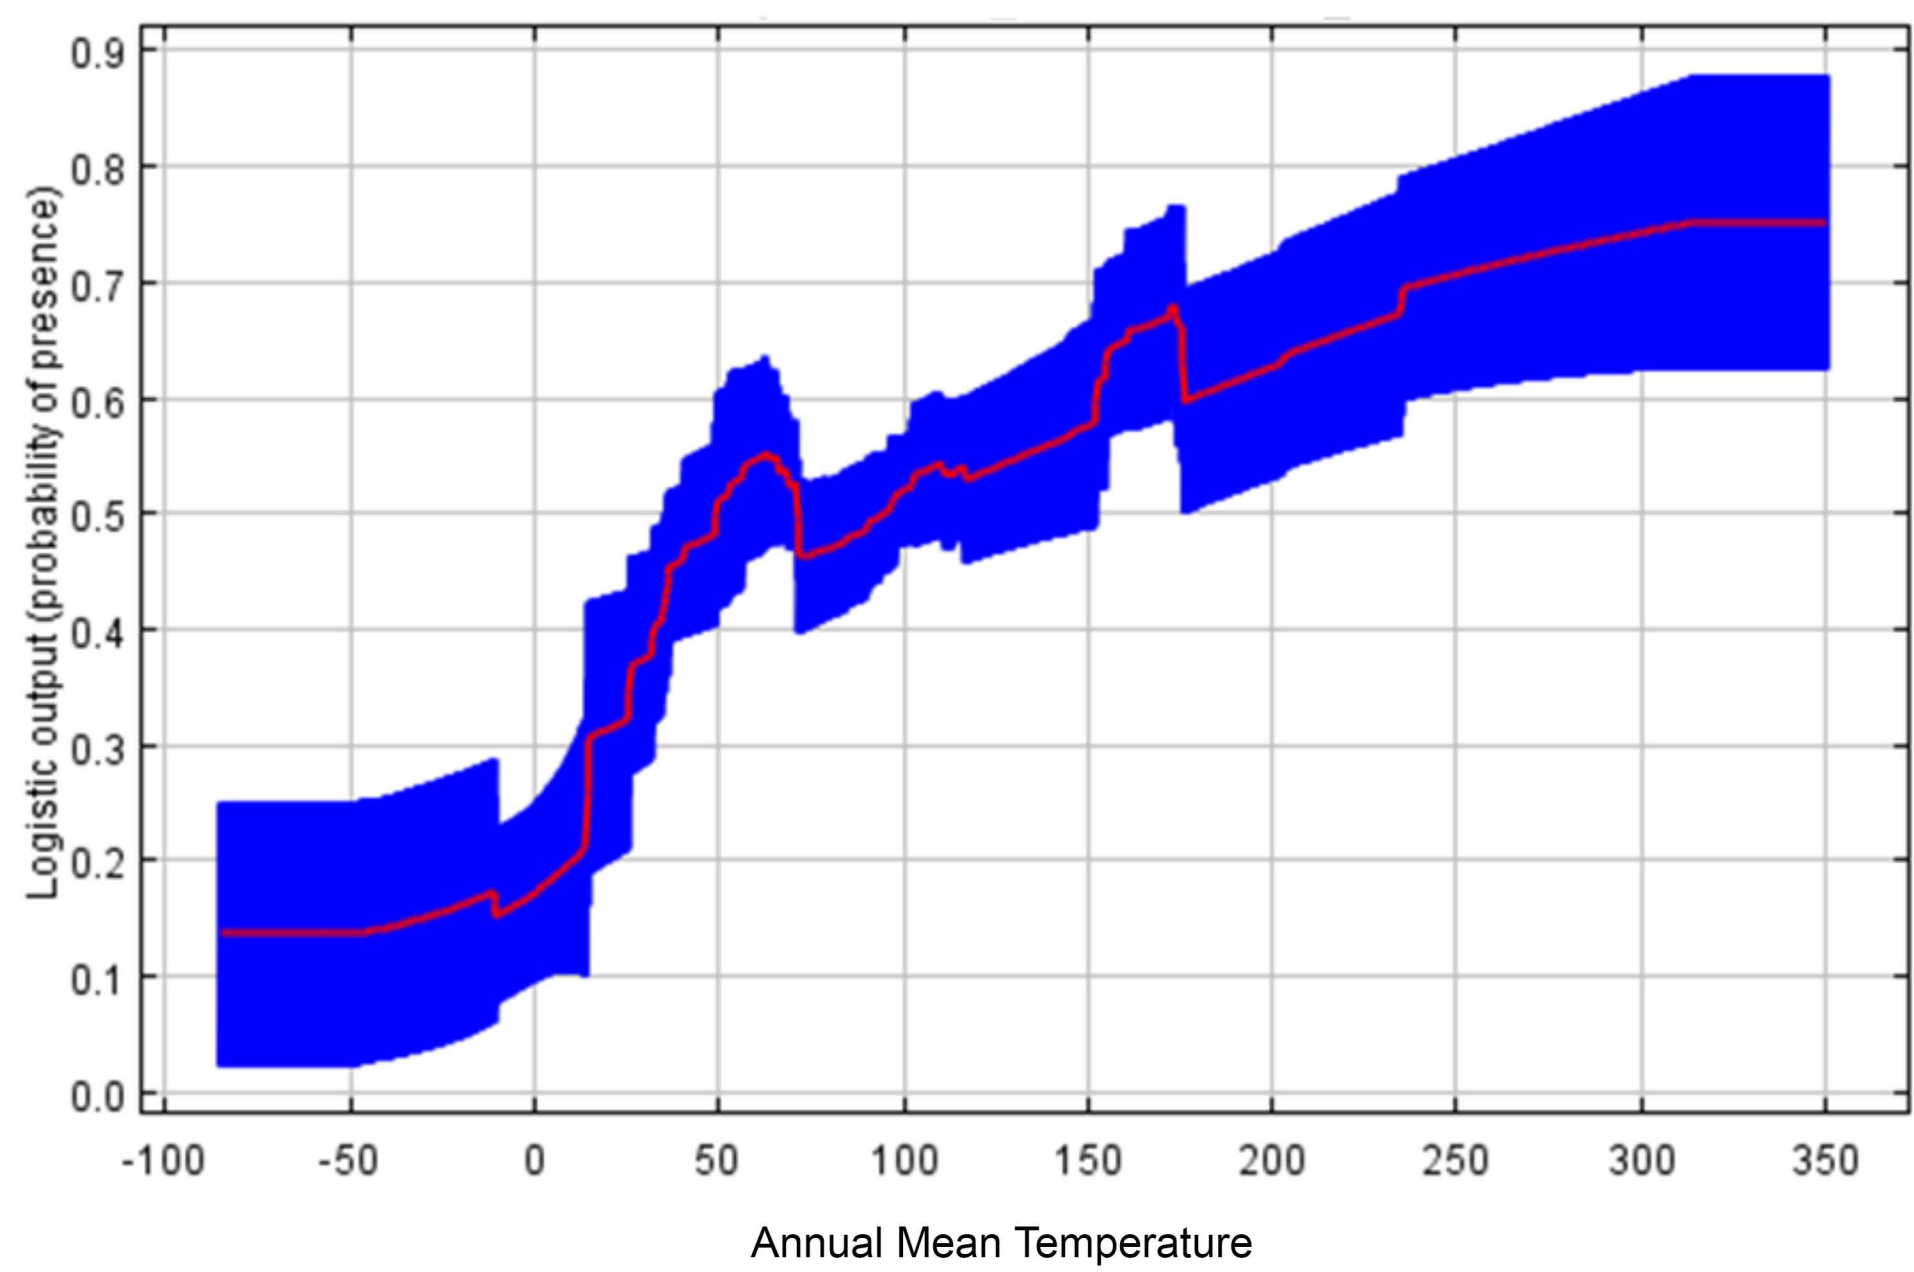

(c)

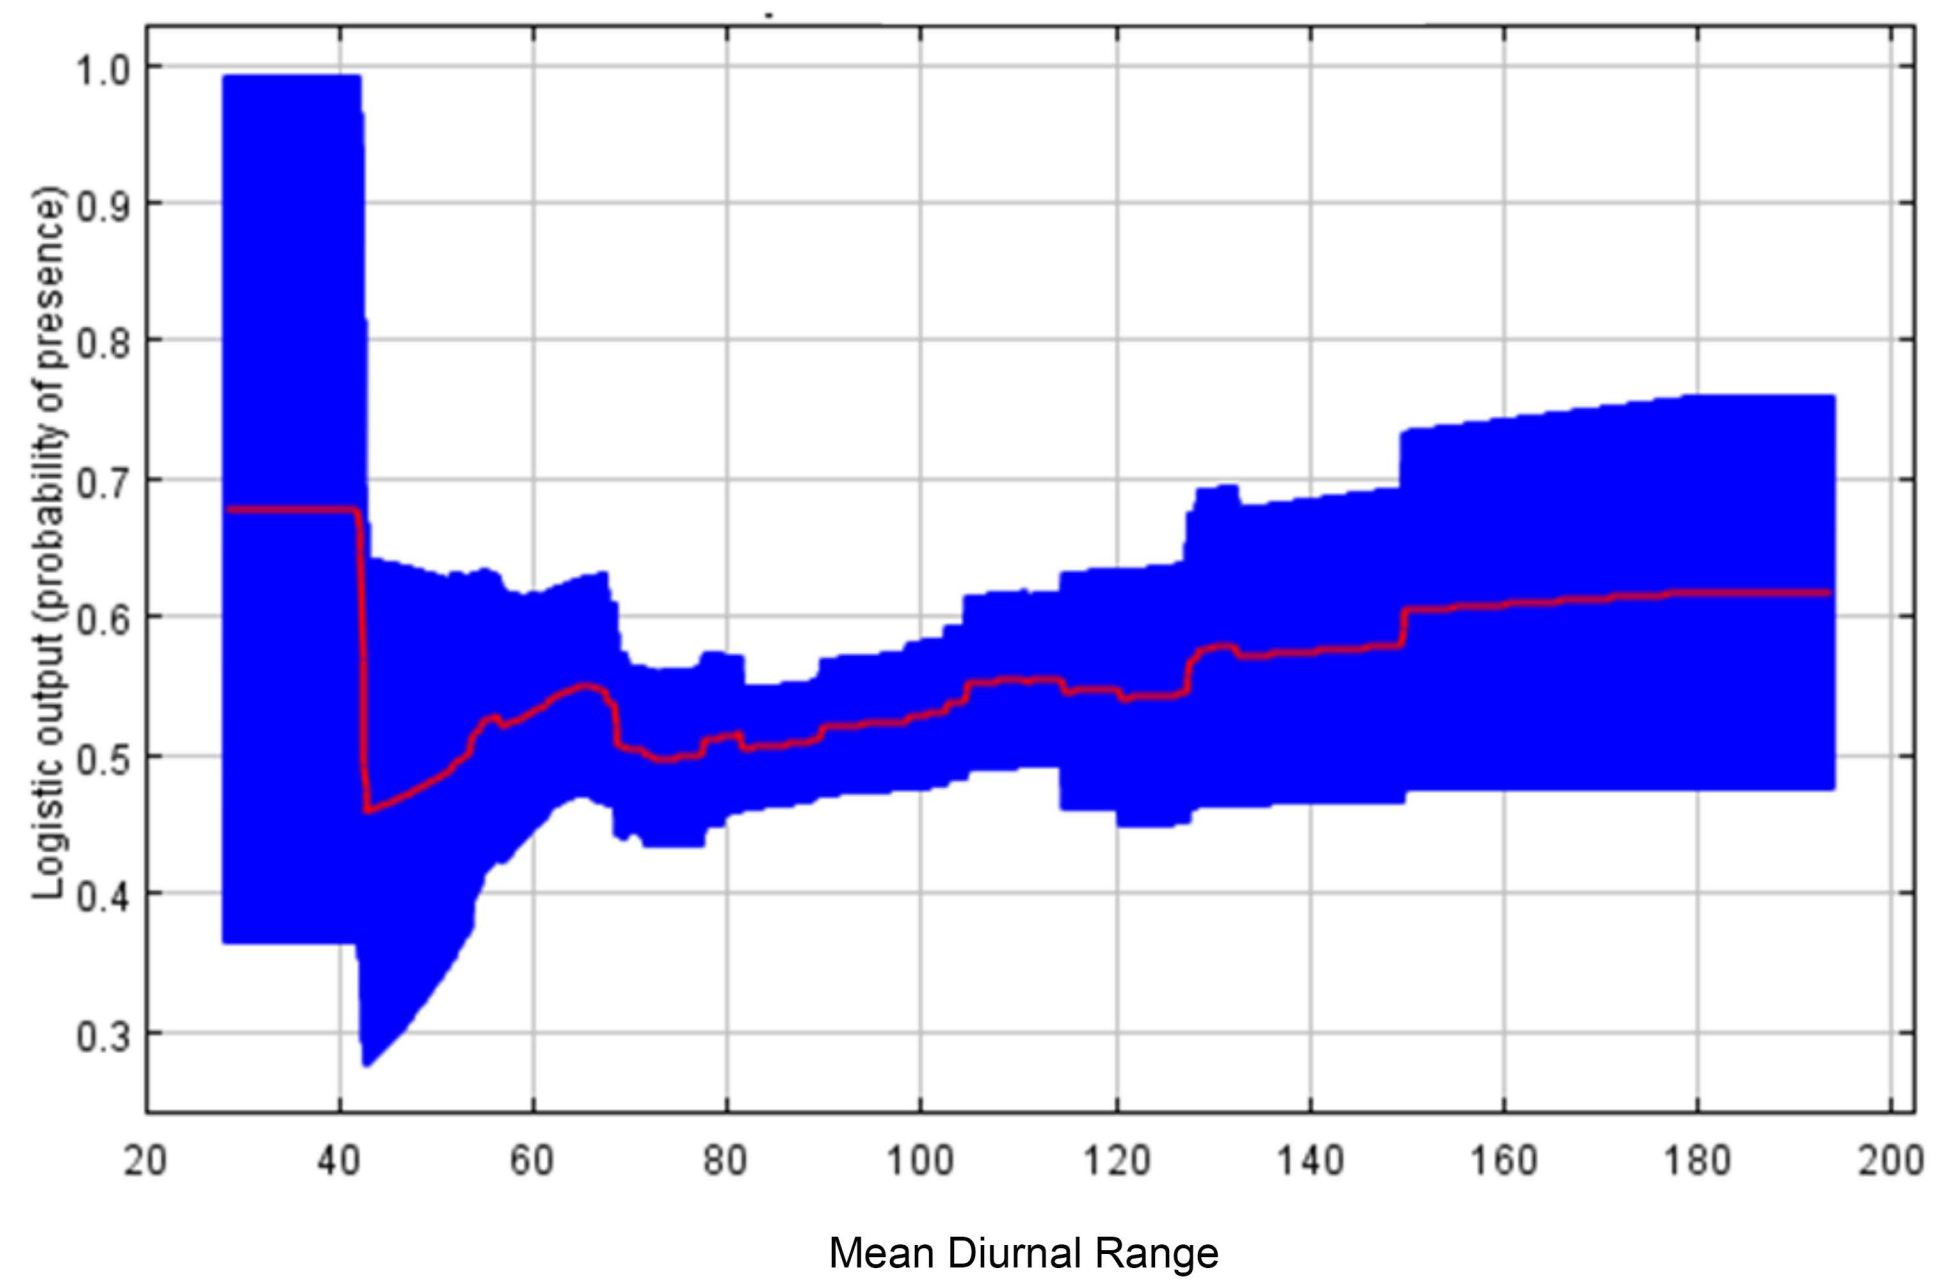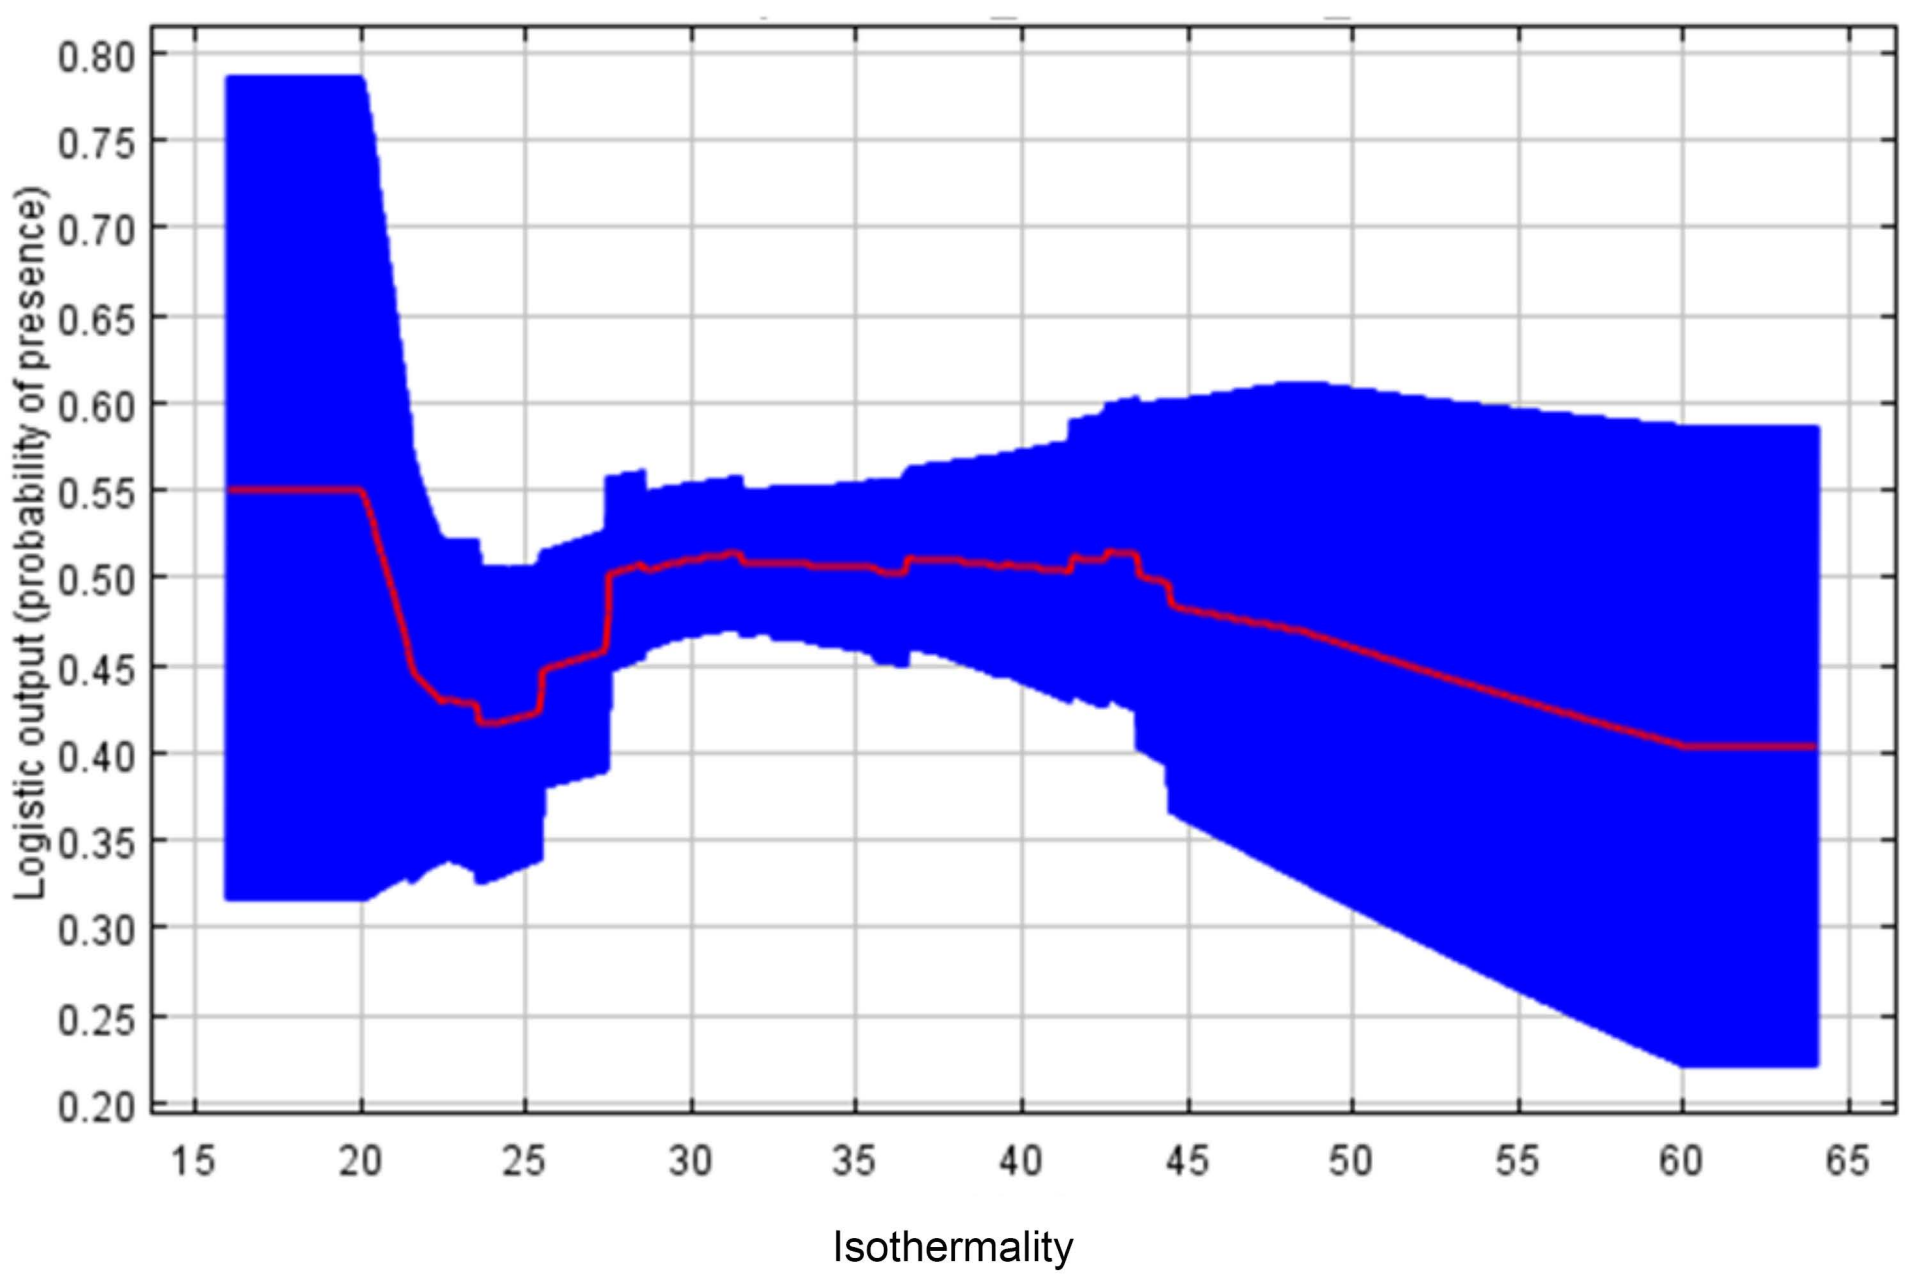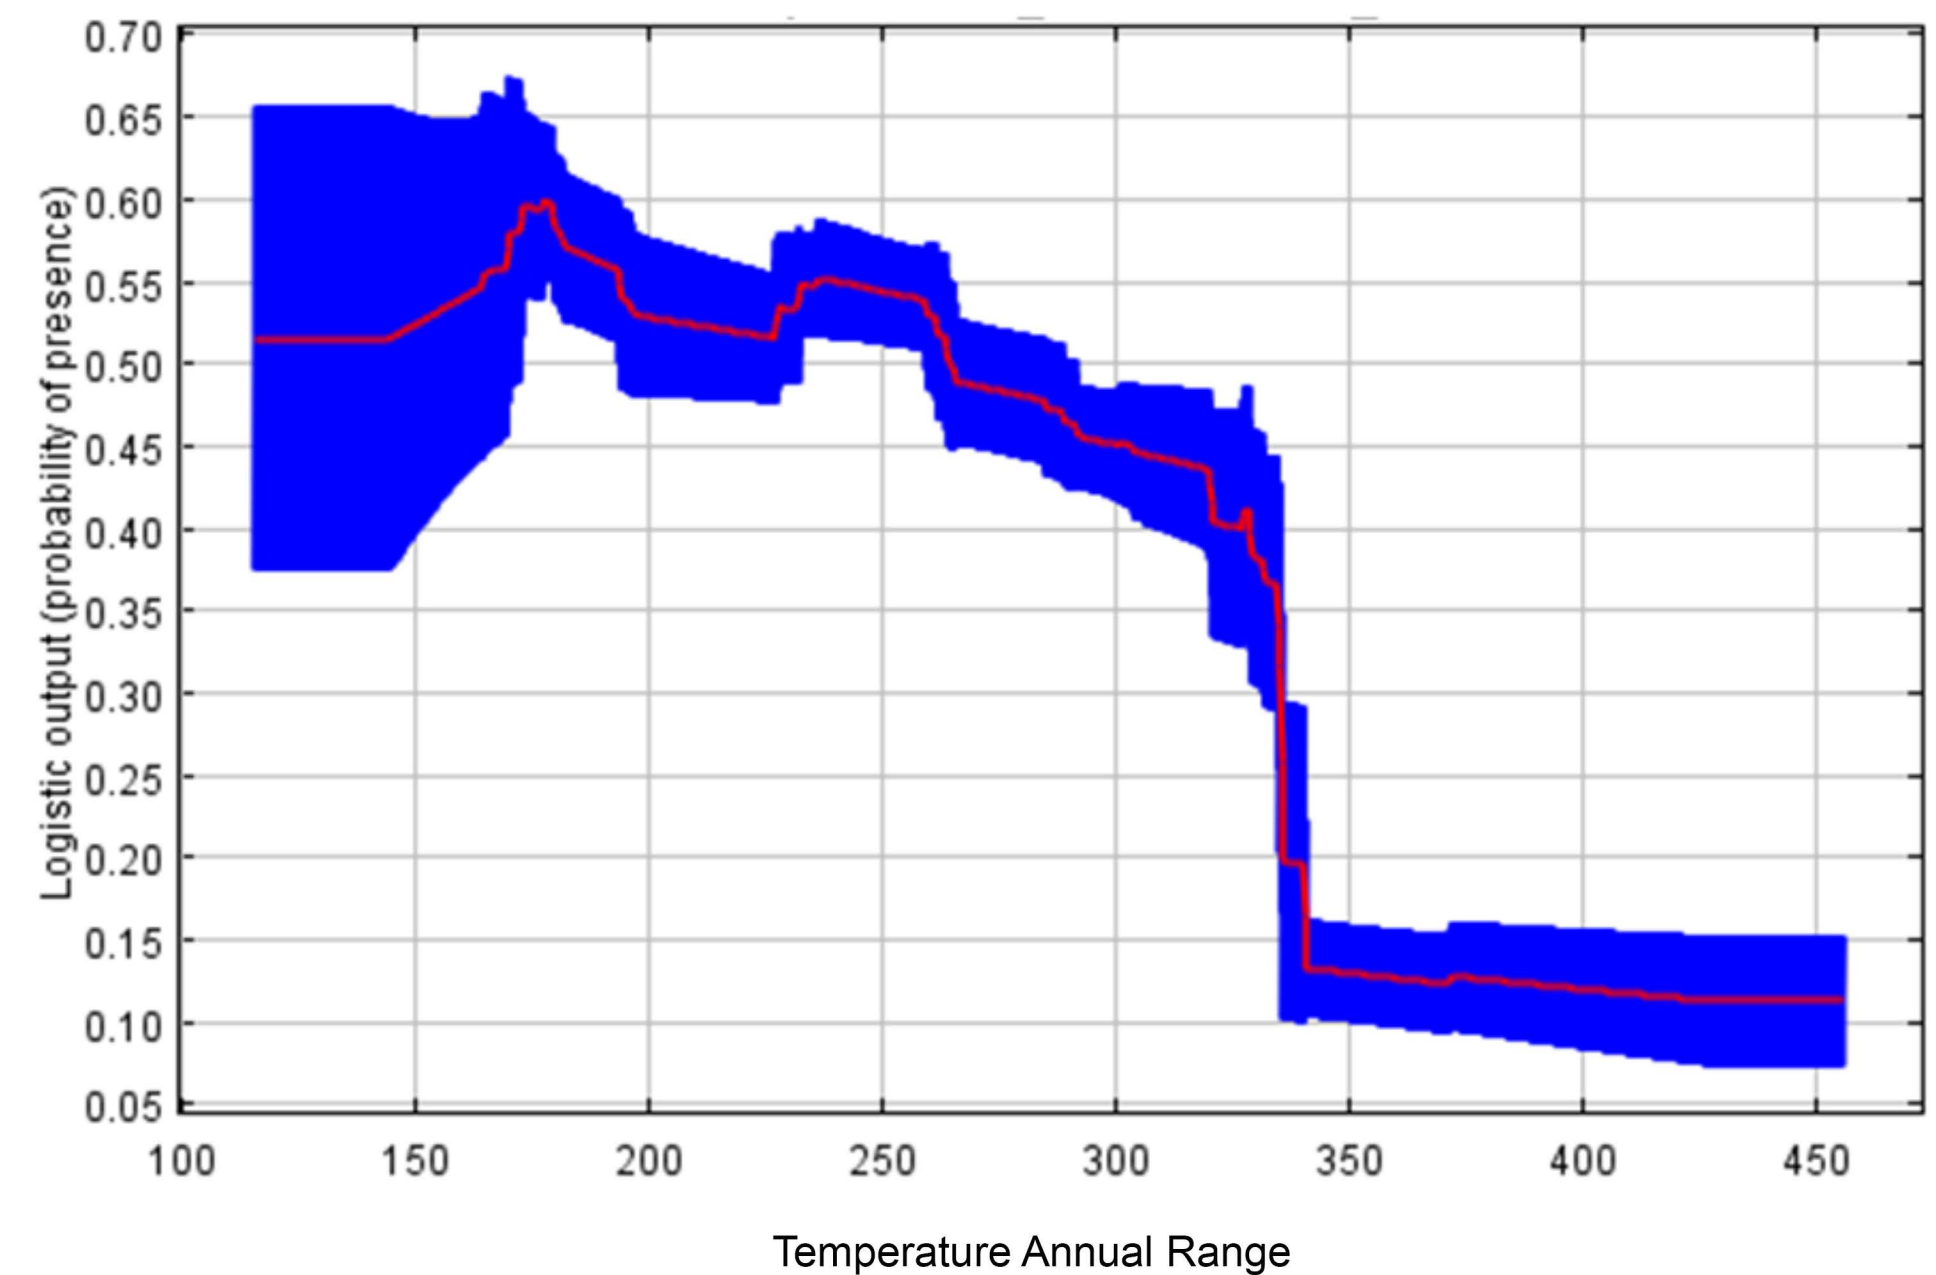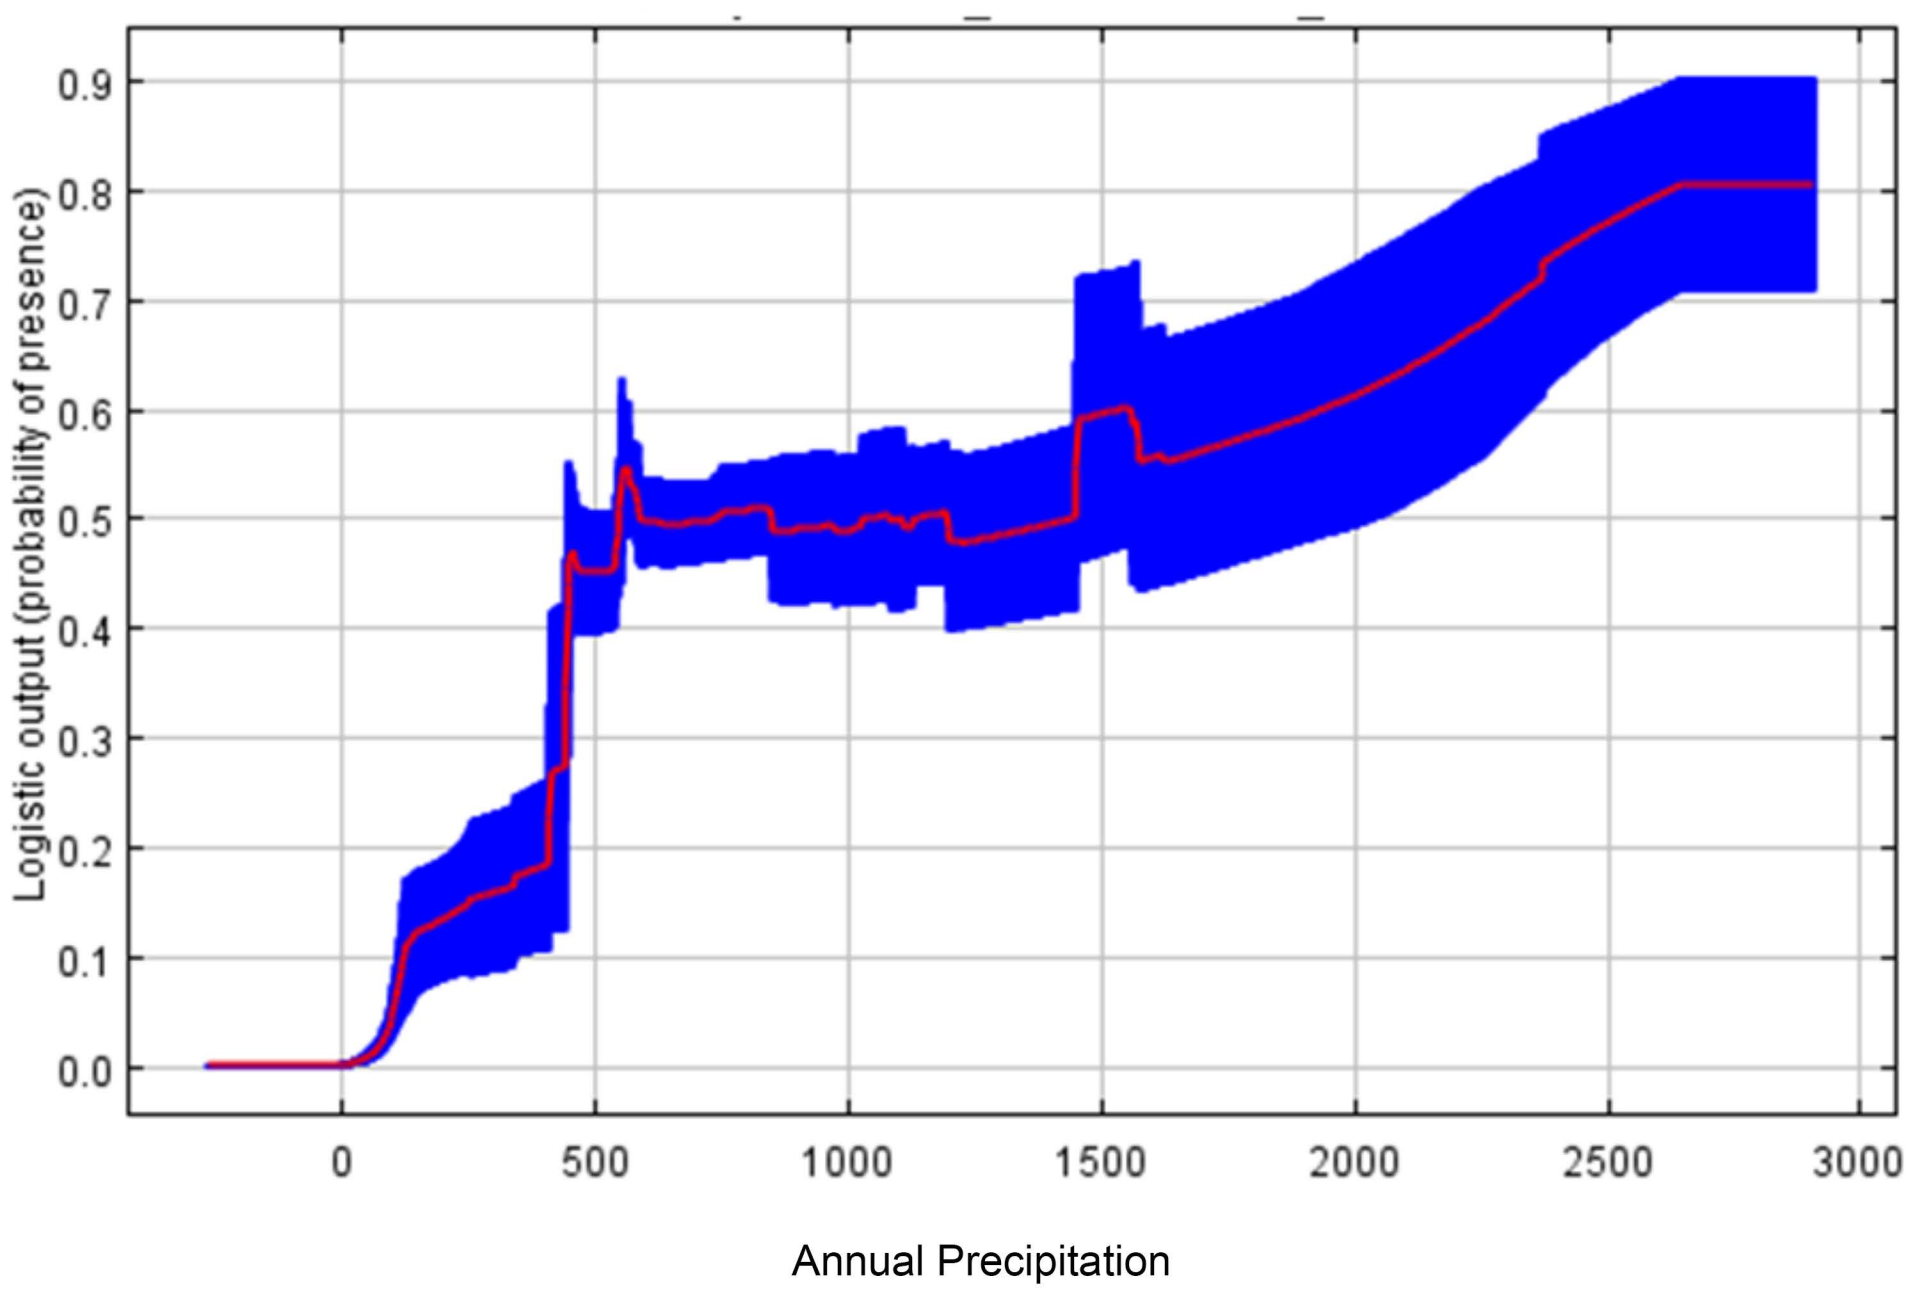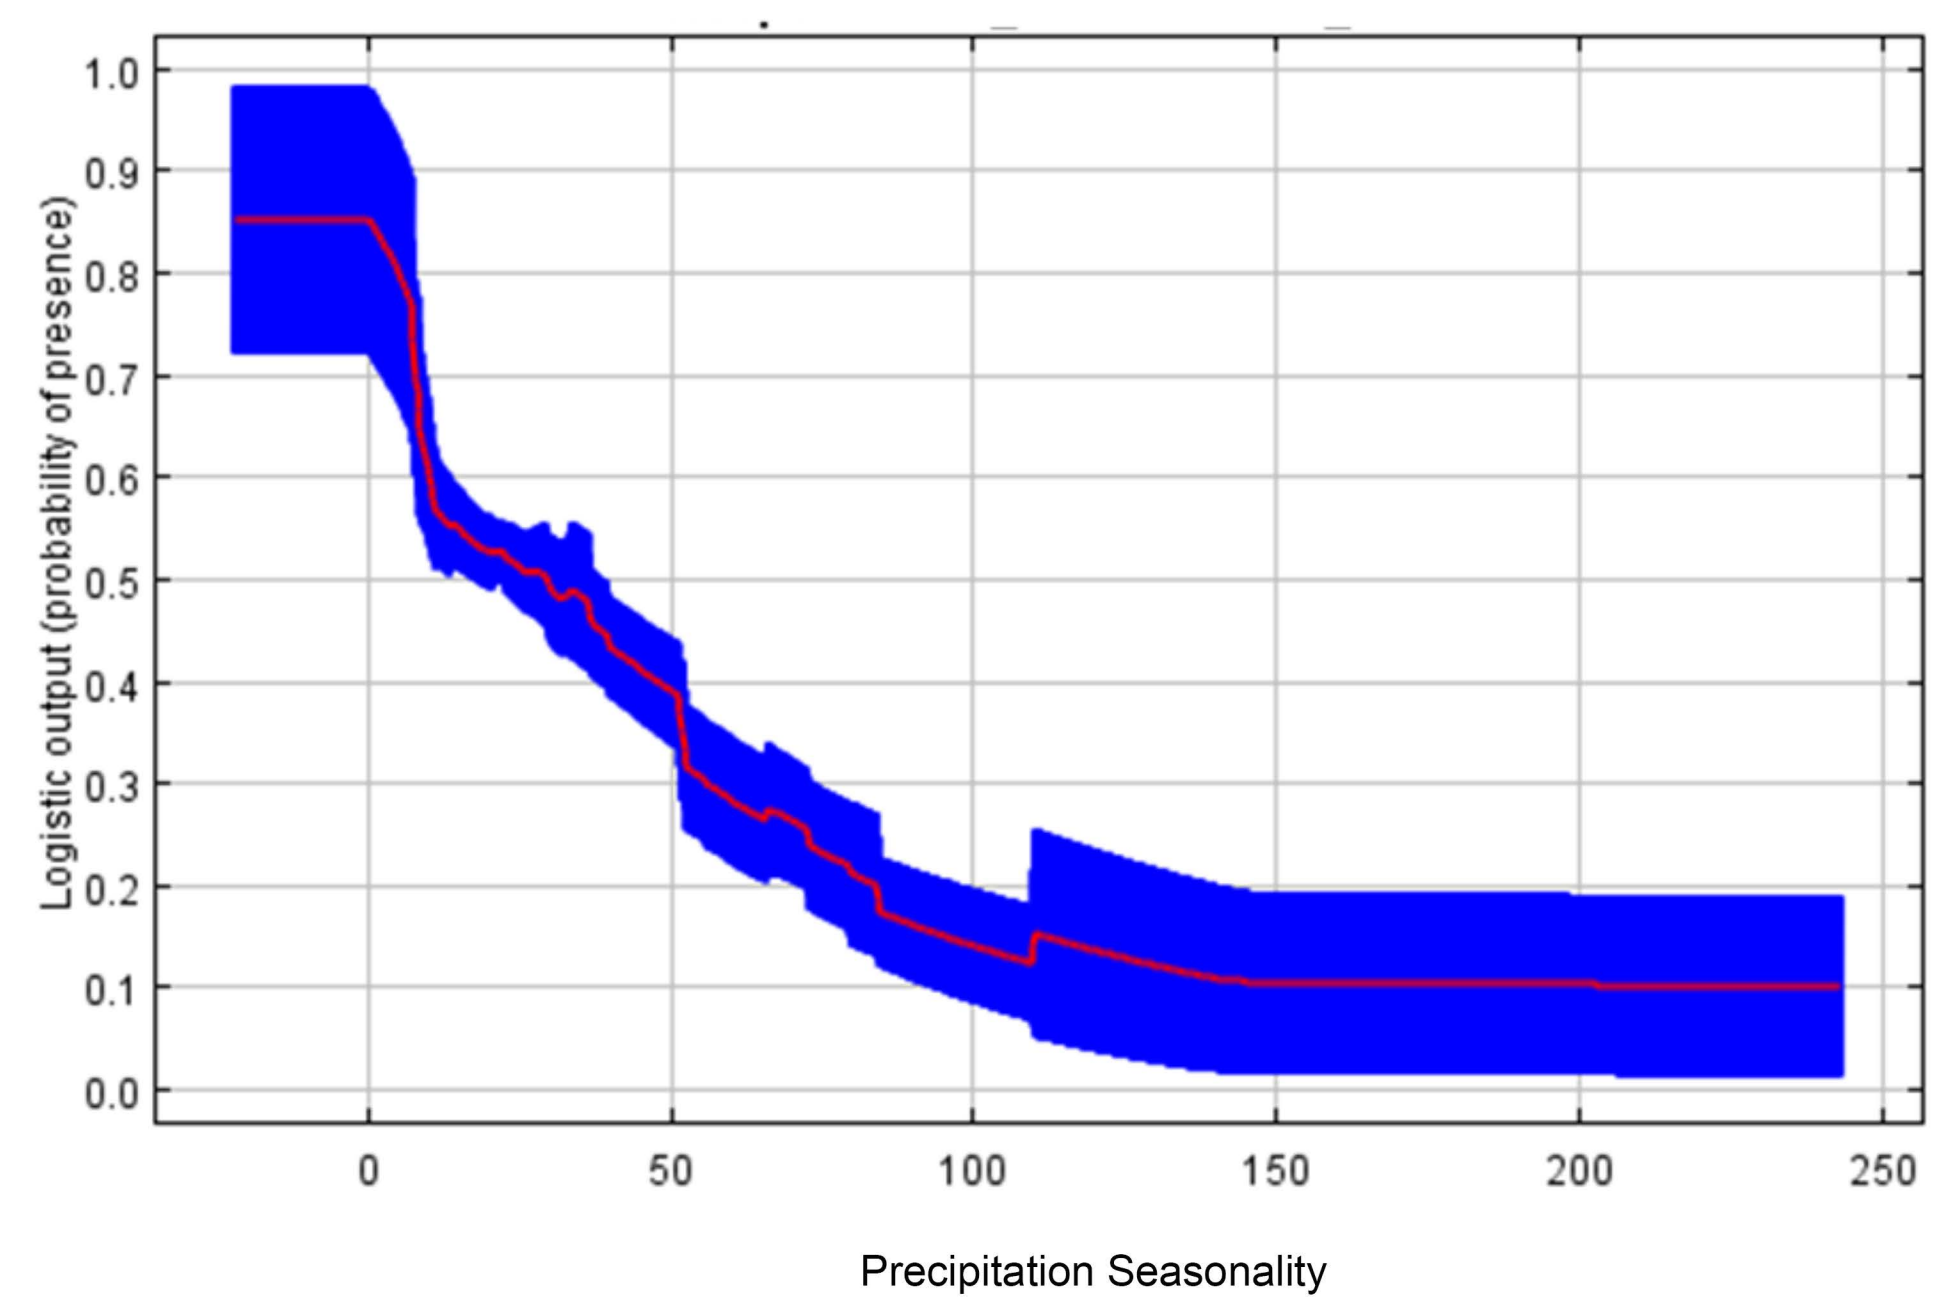



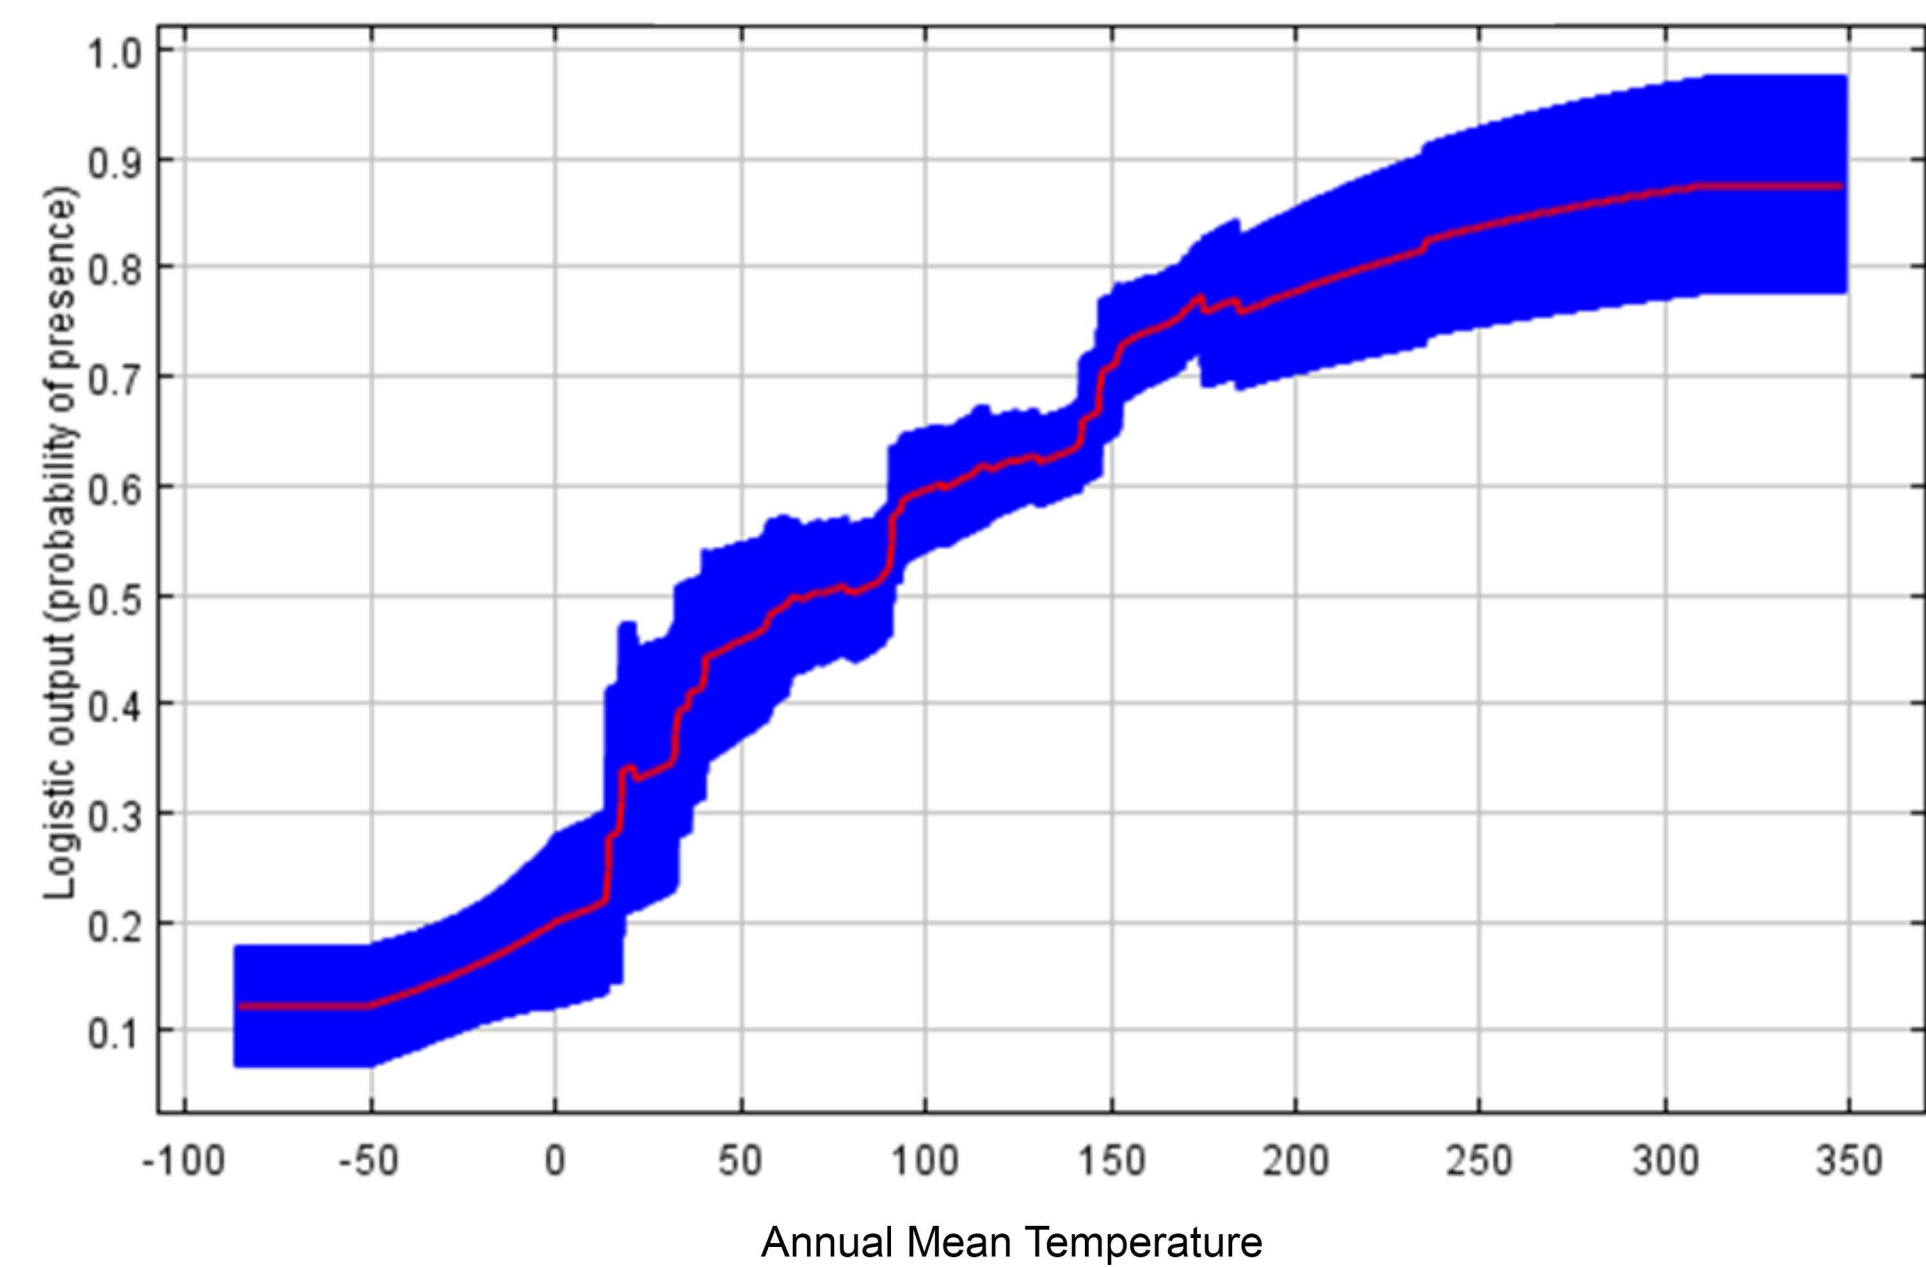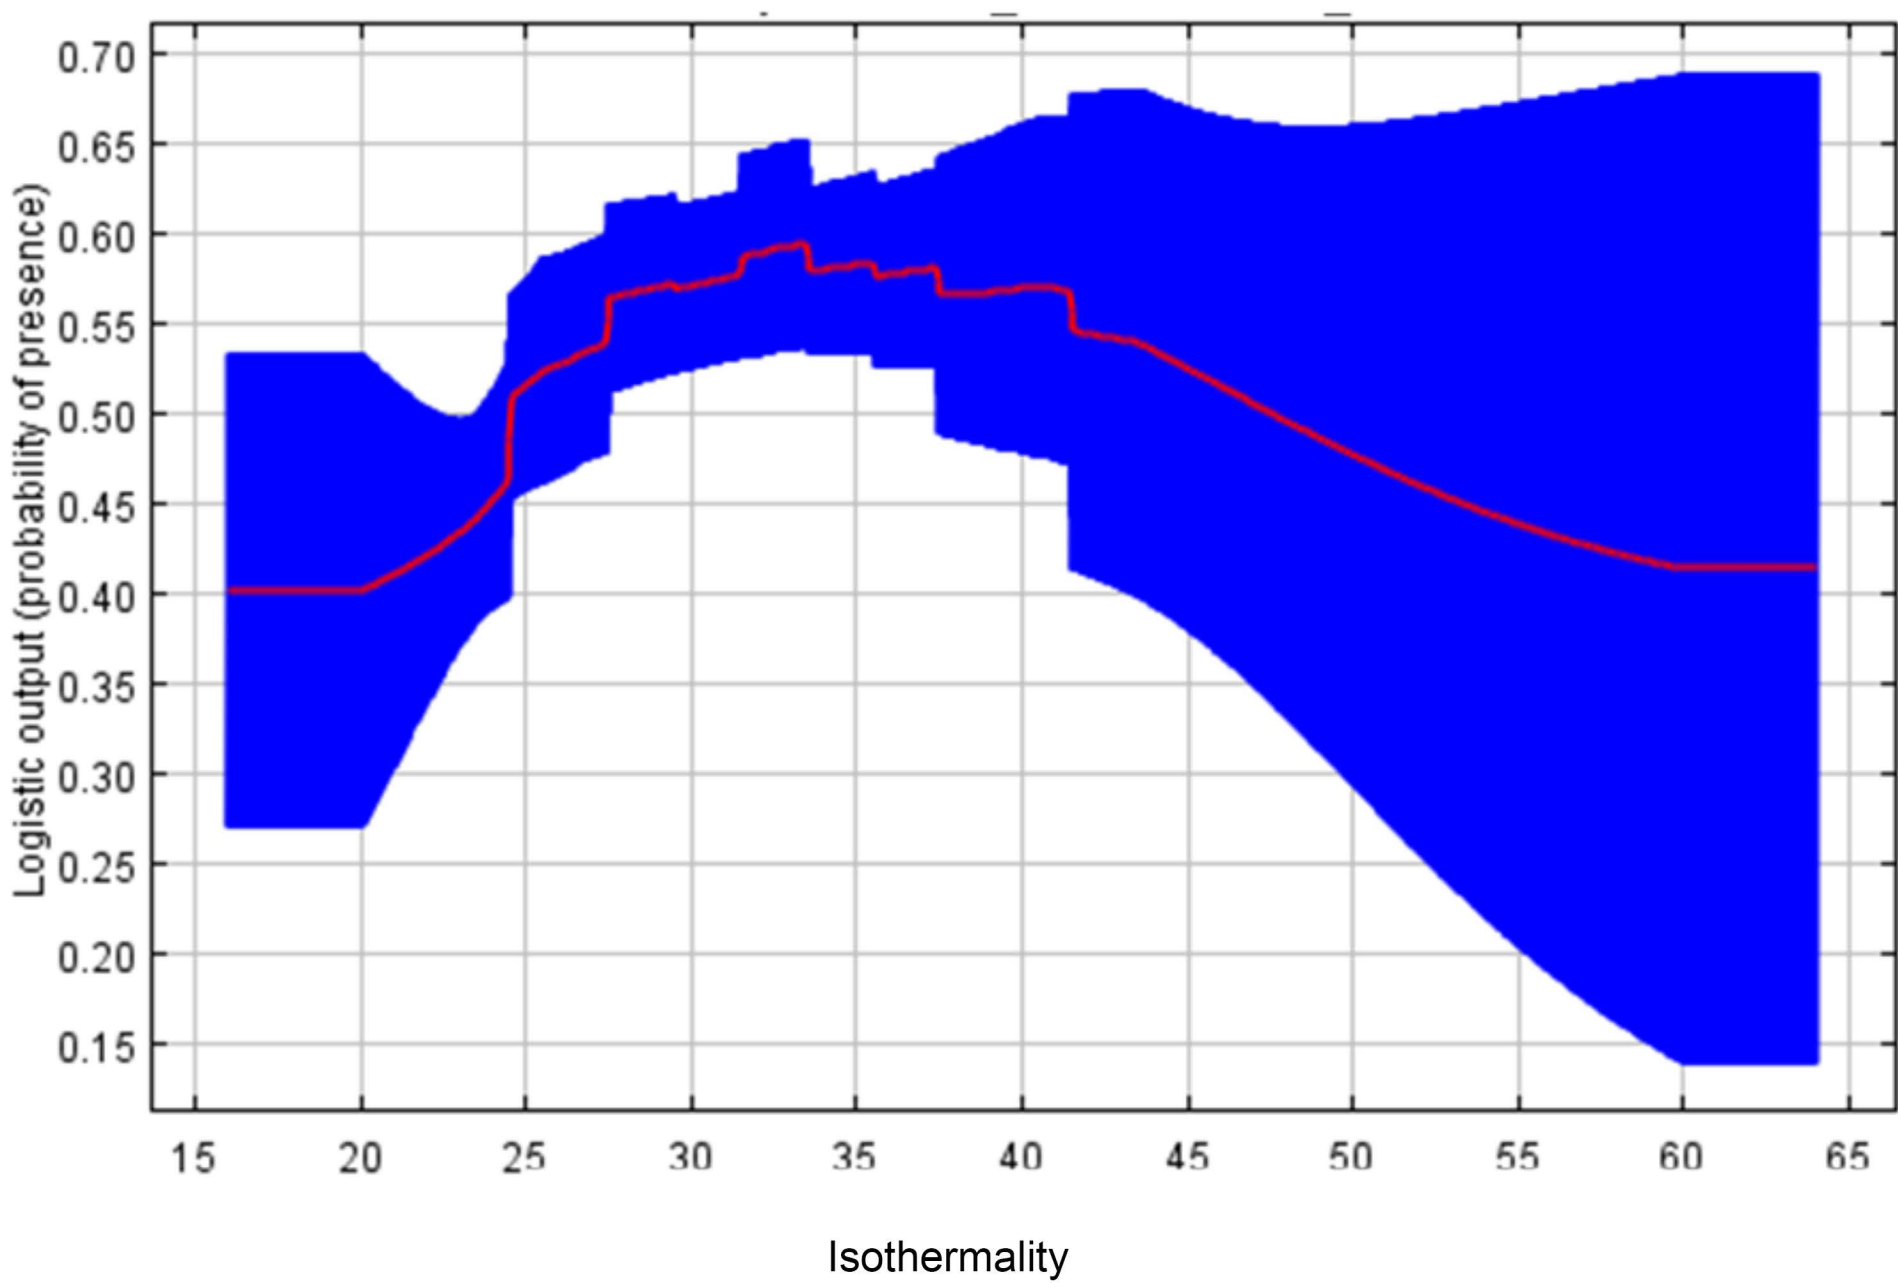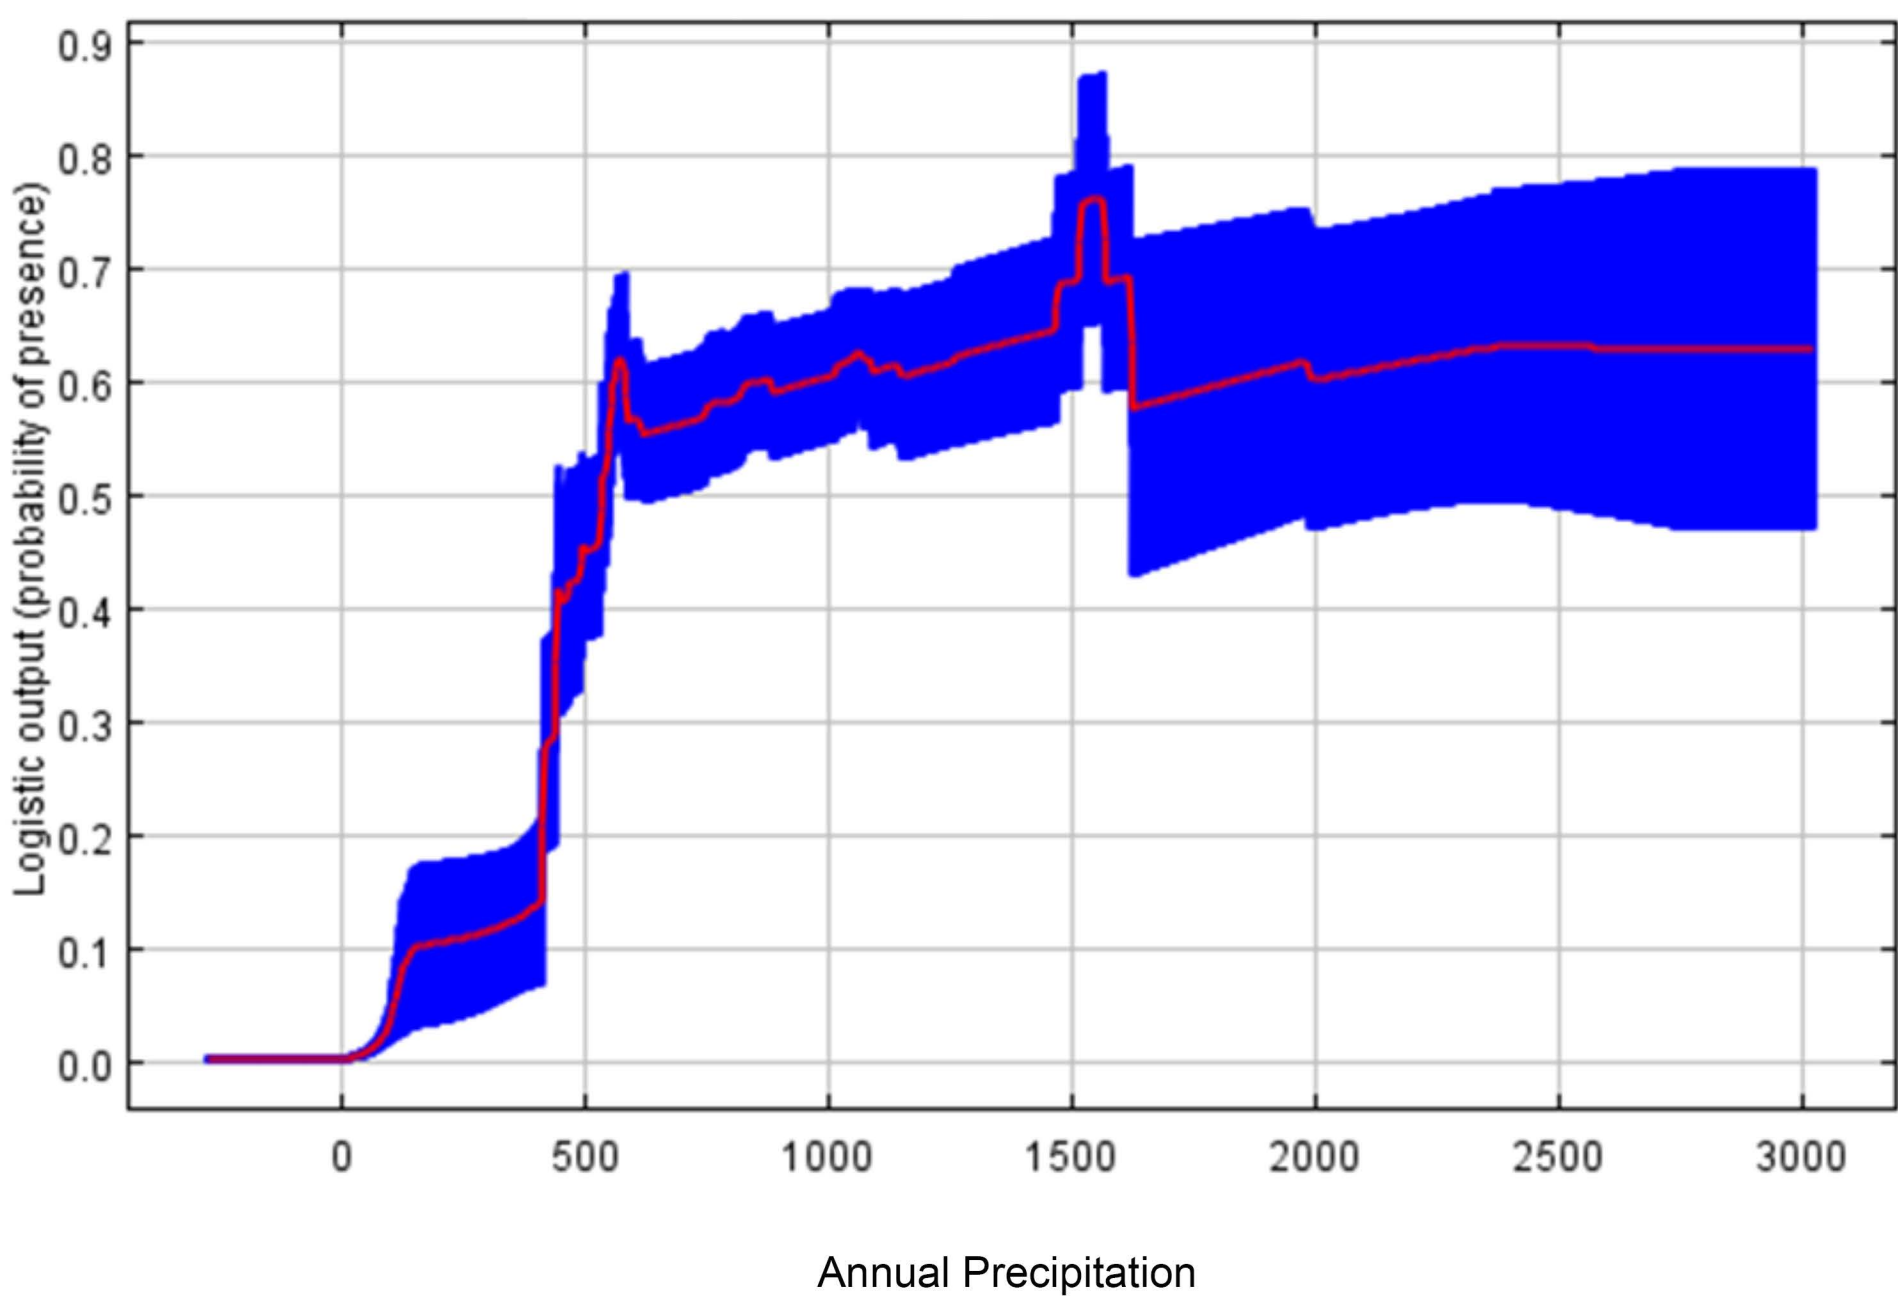

(d)

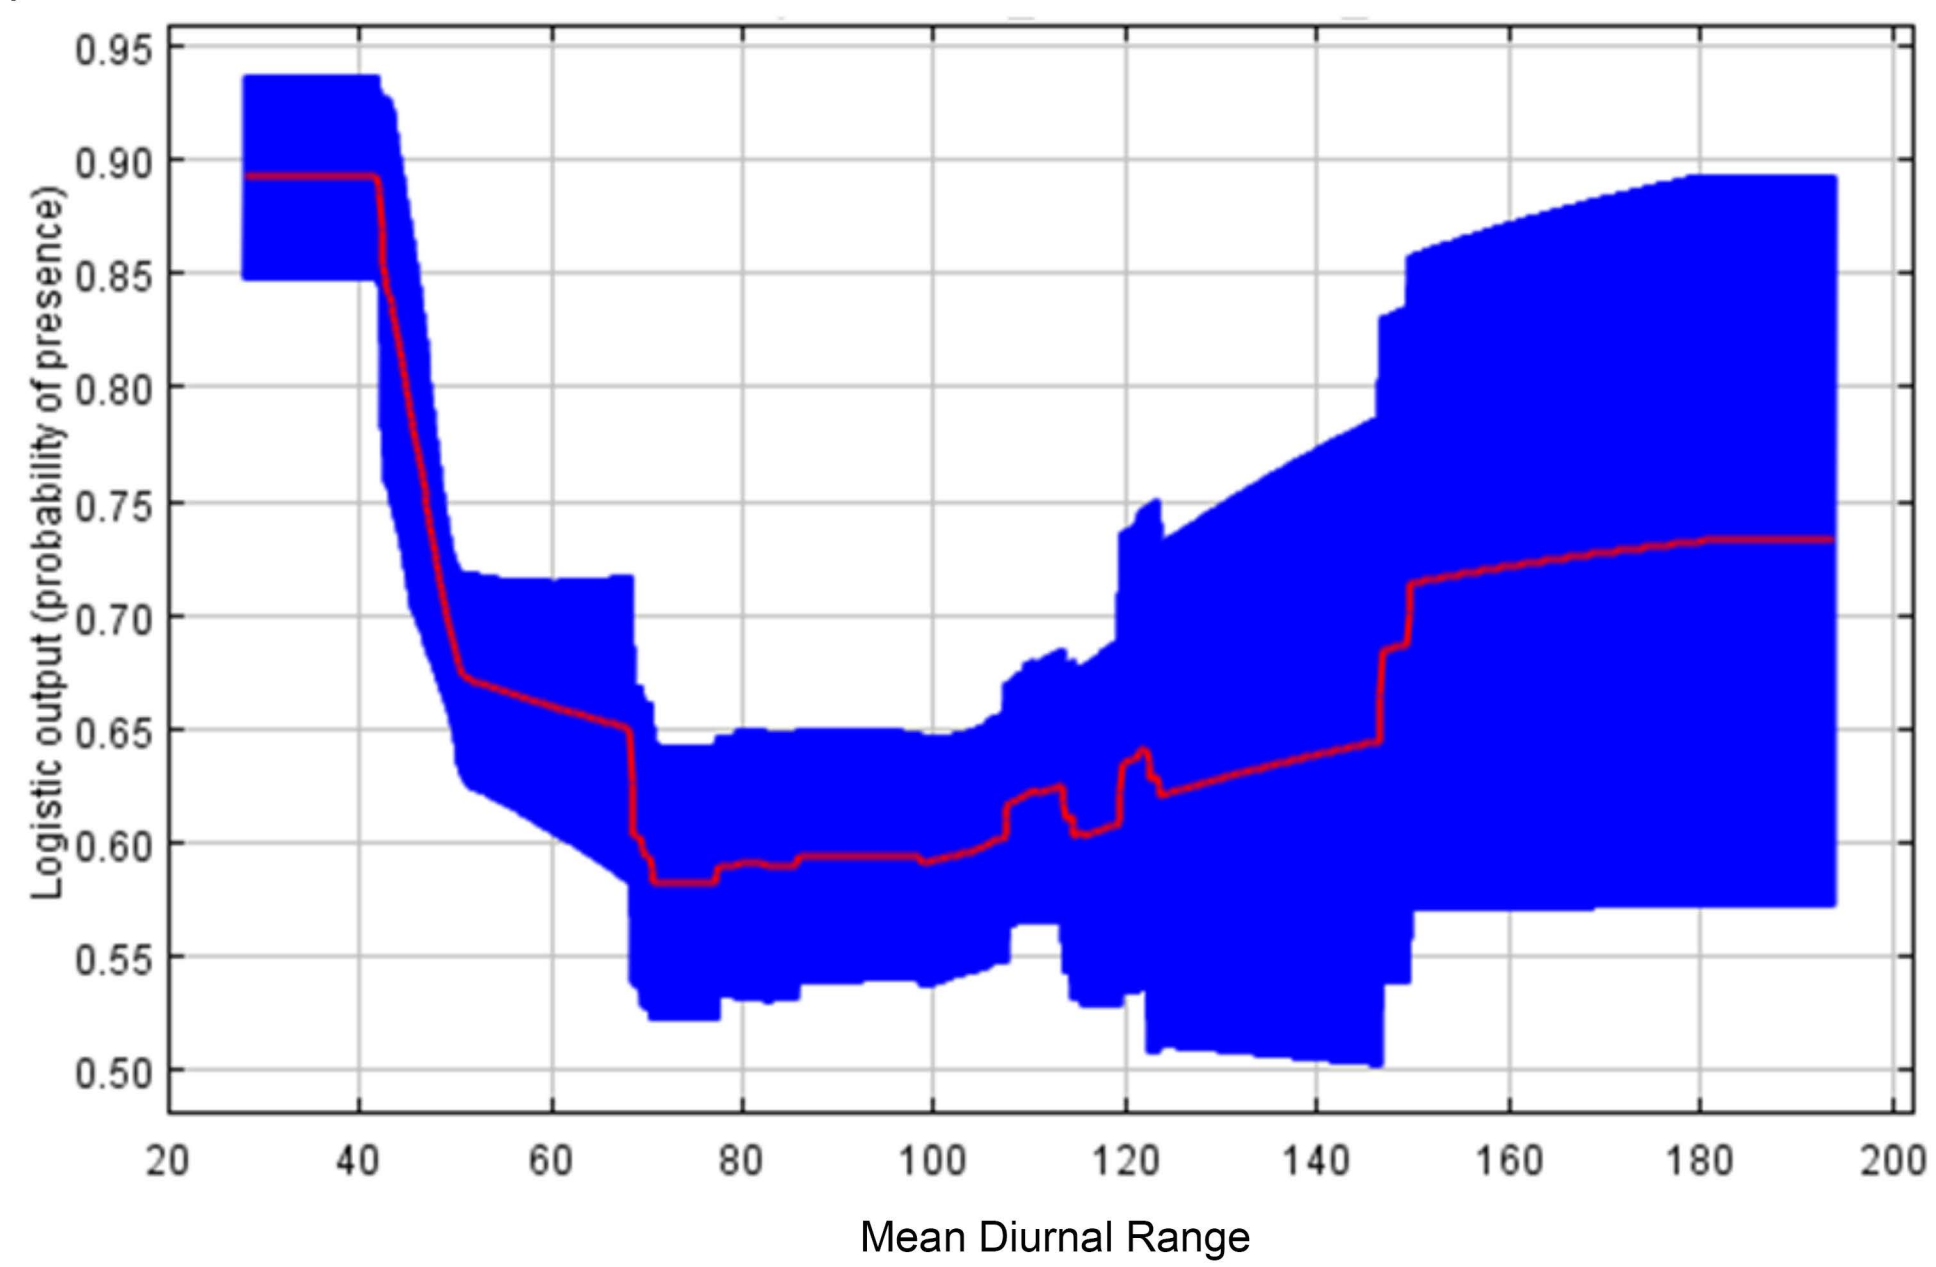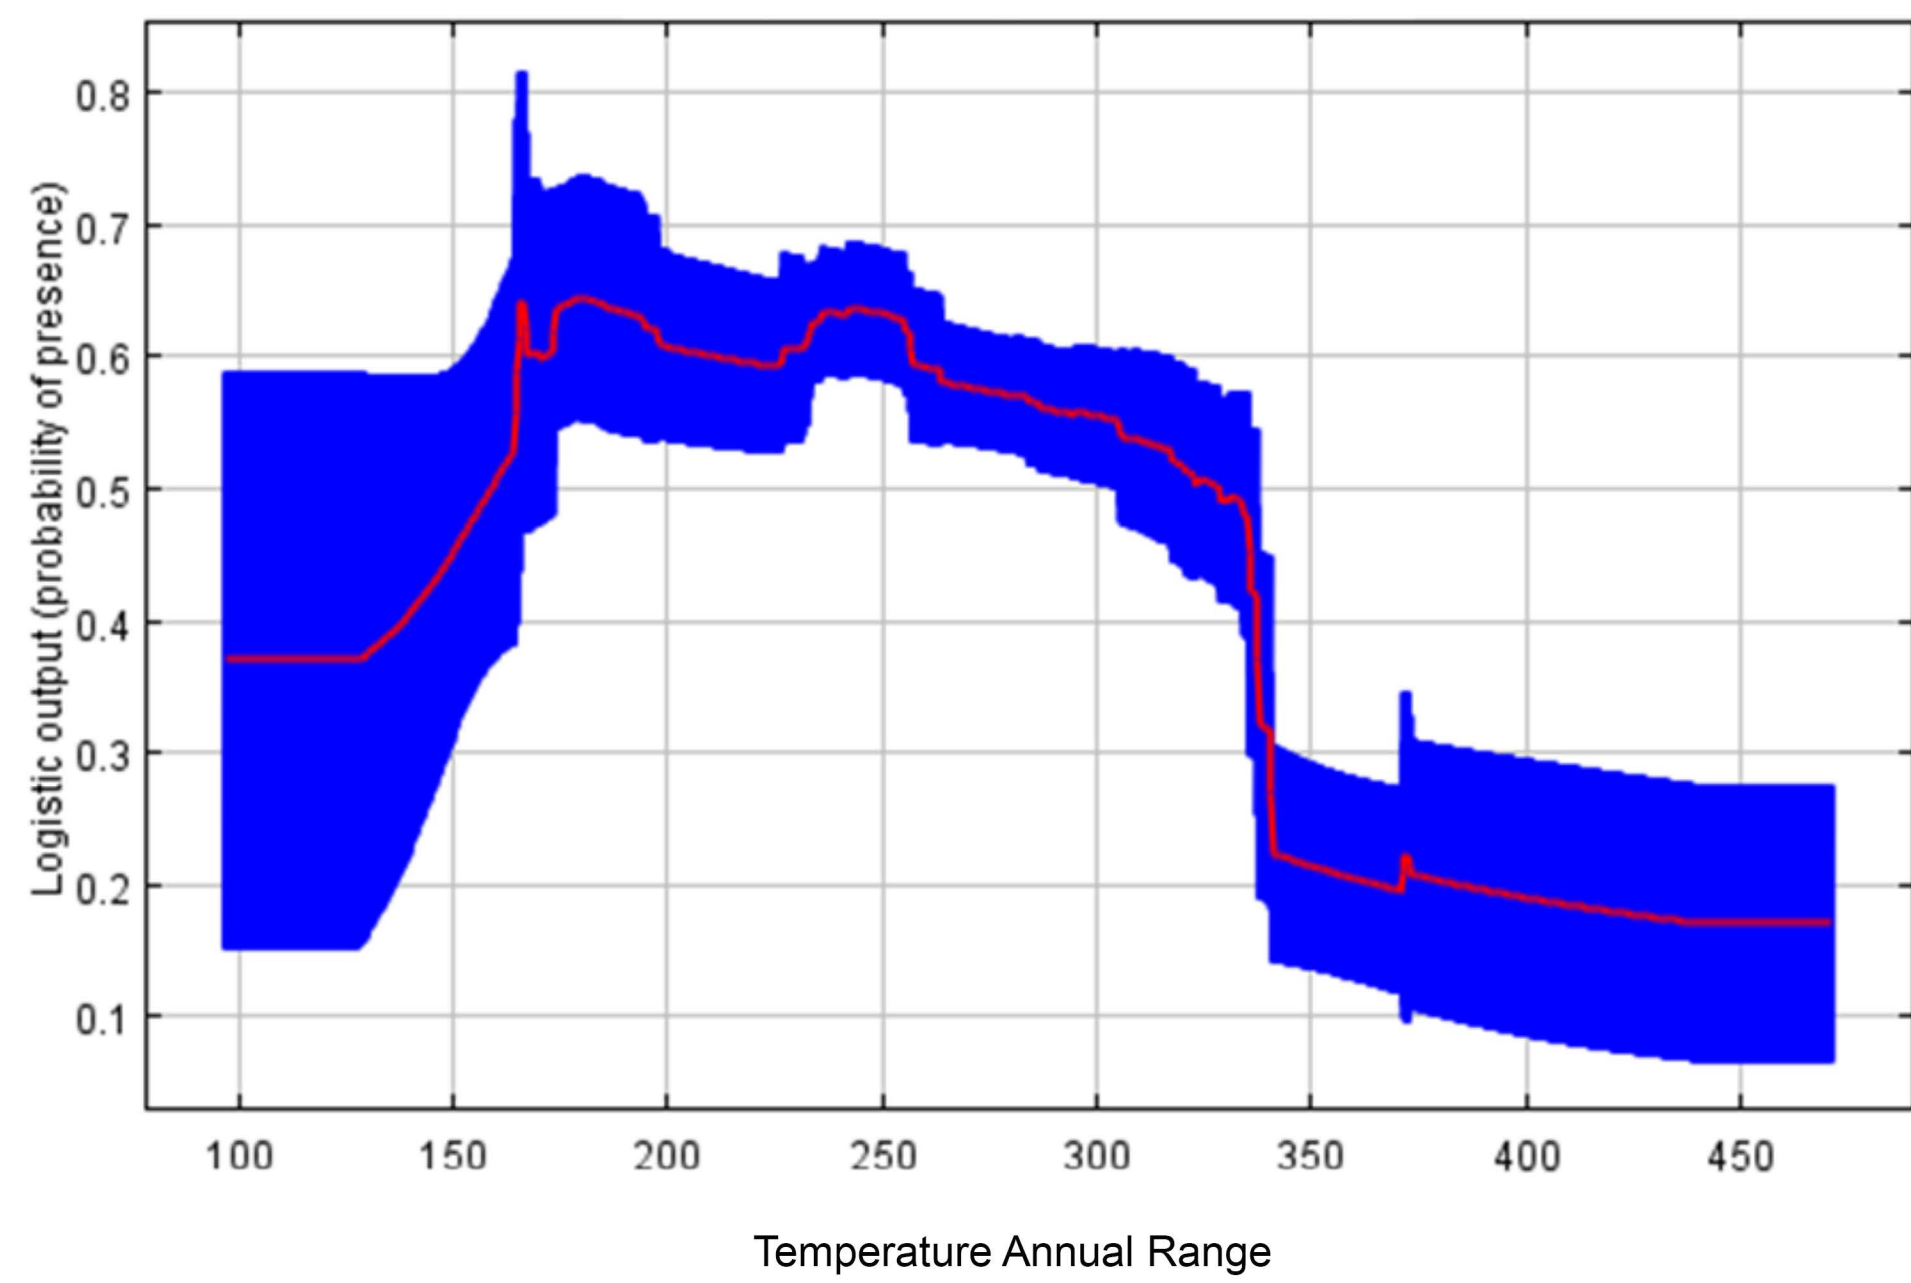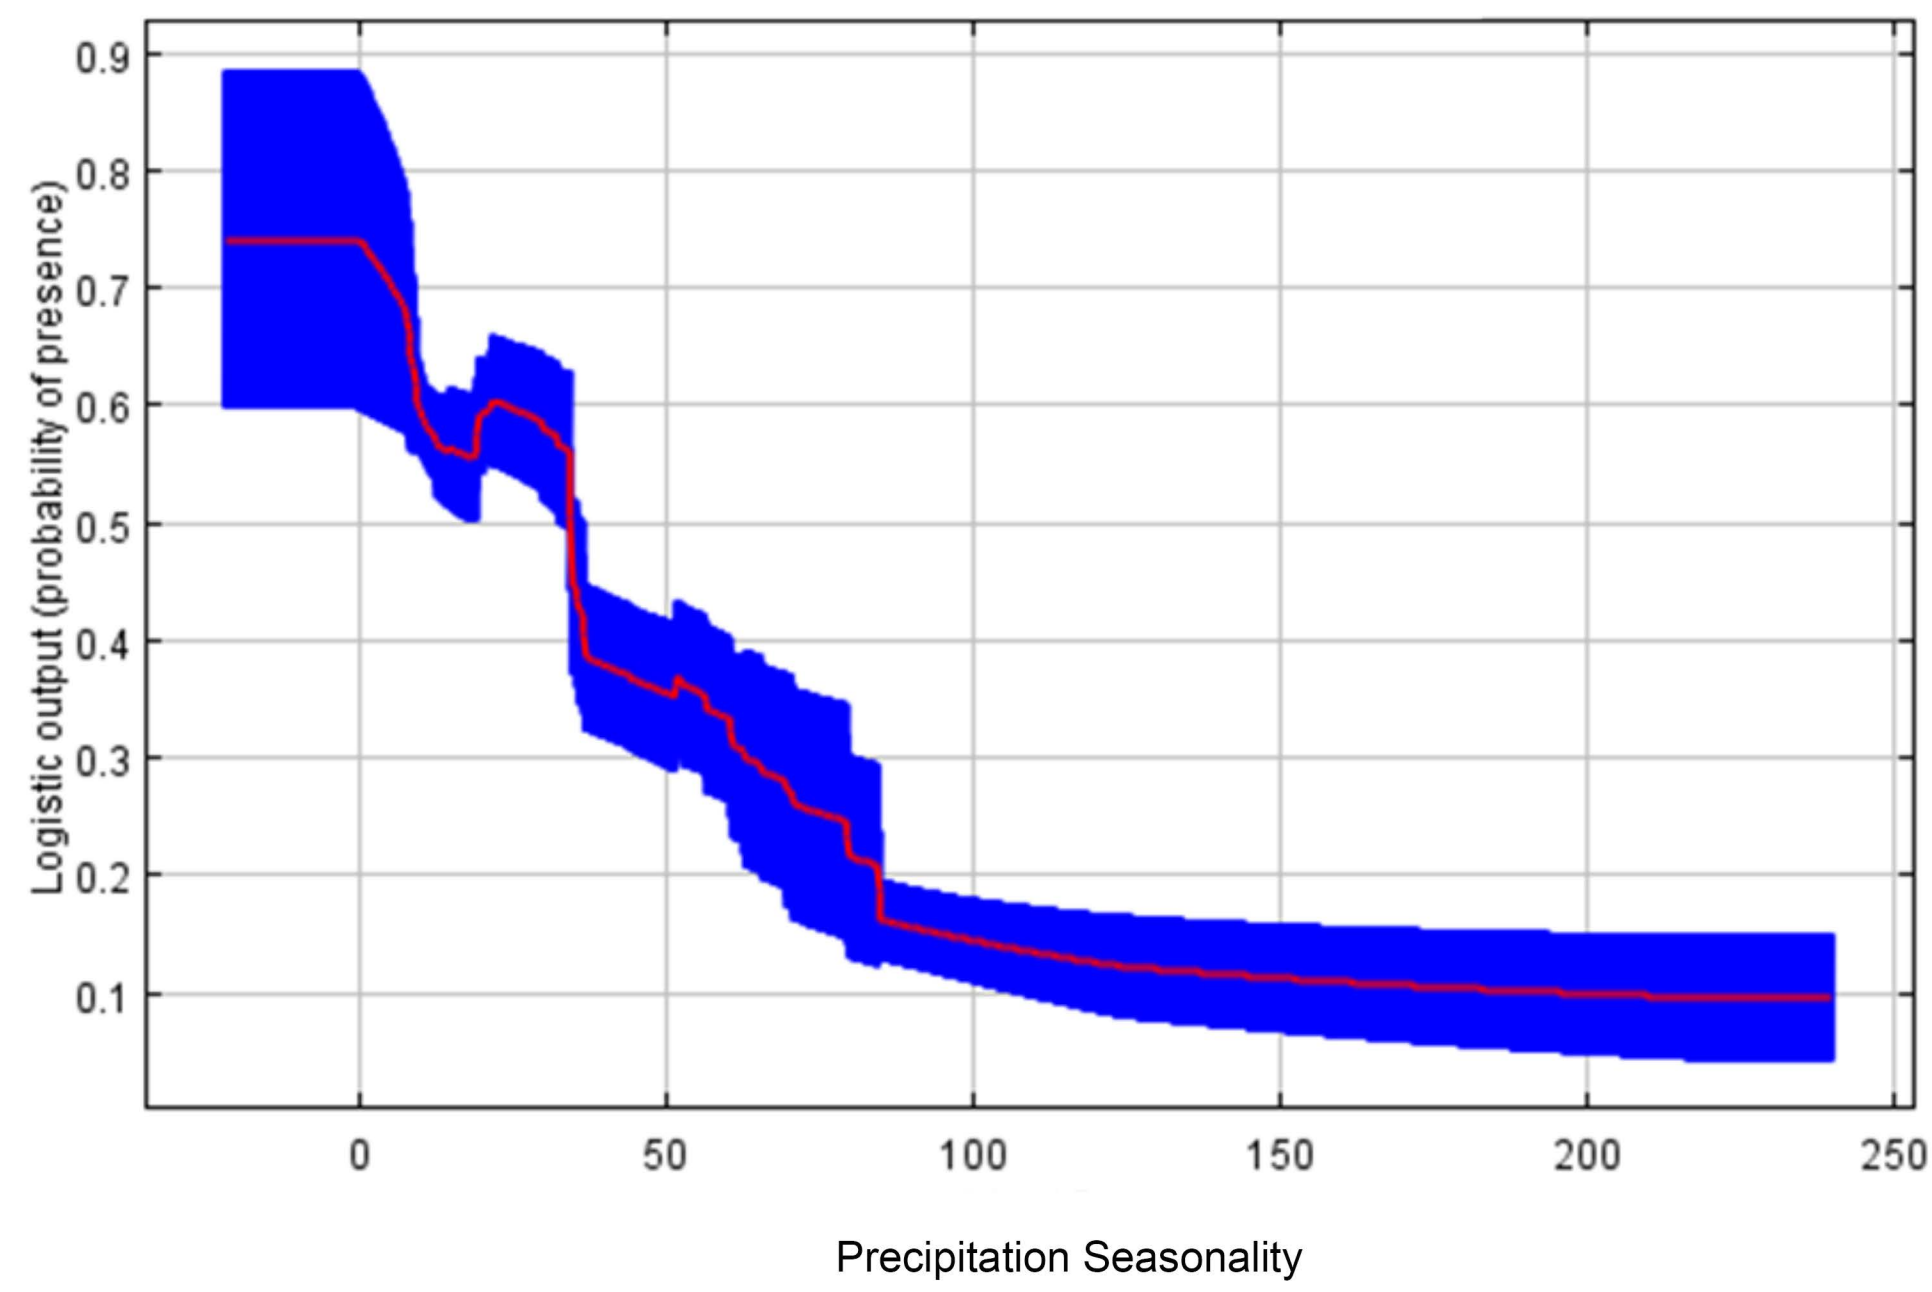



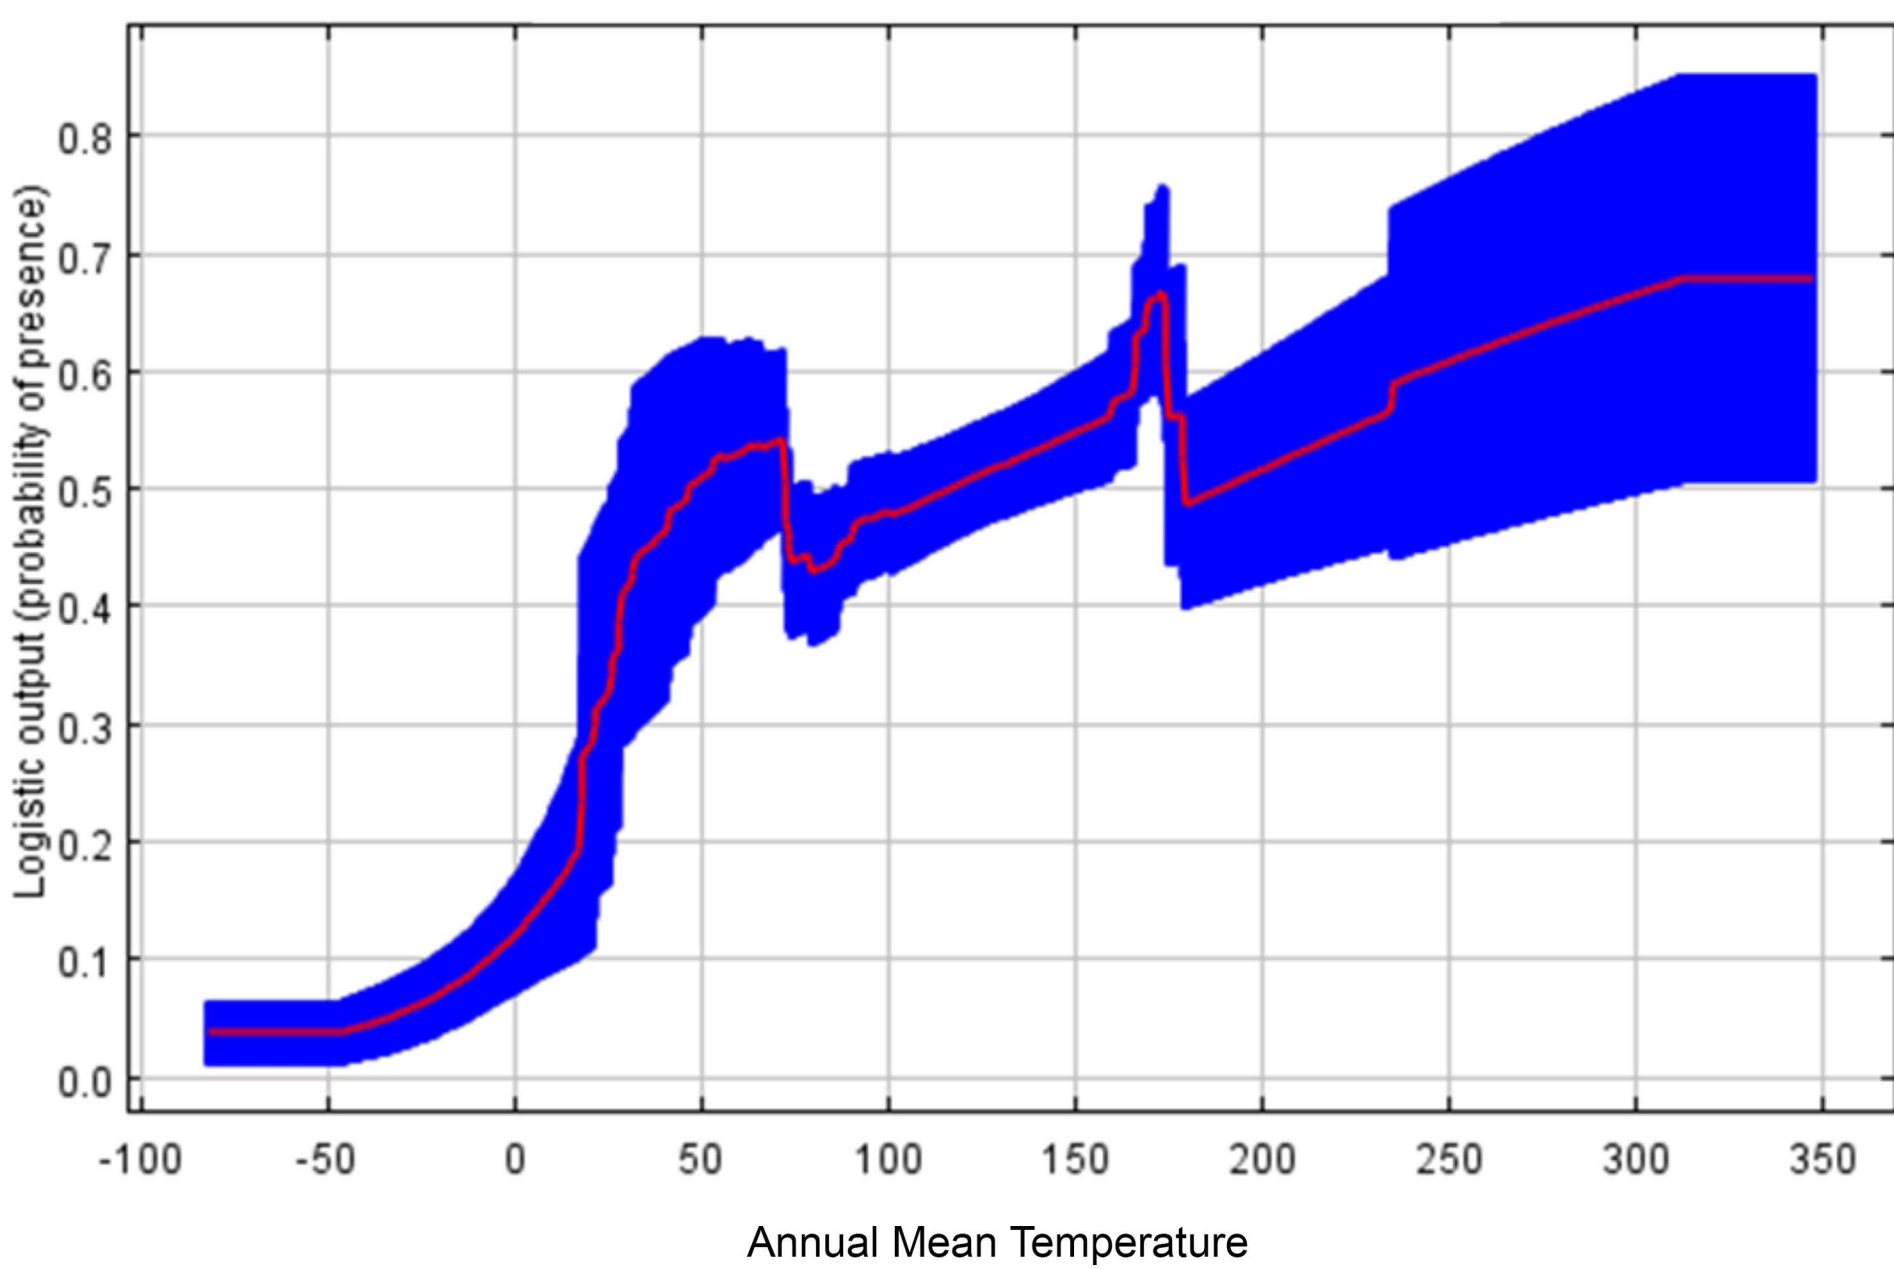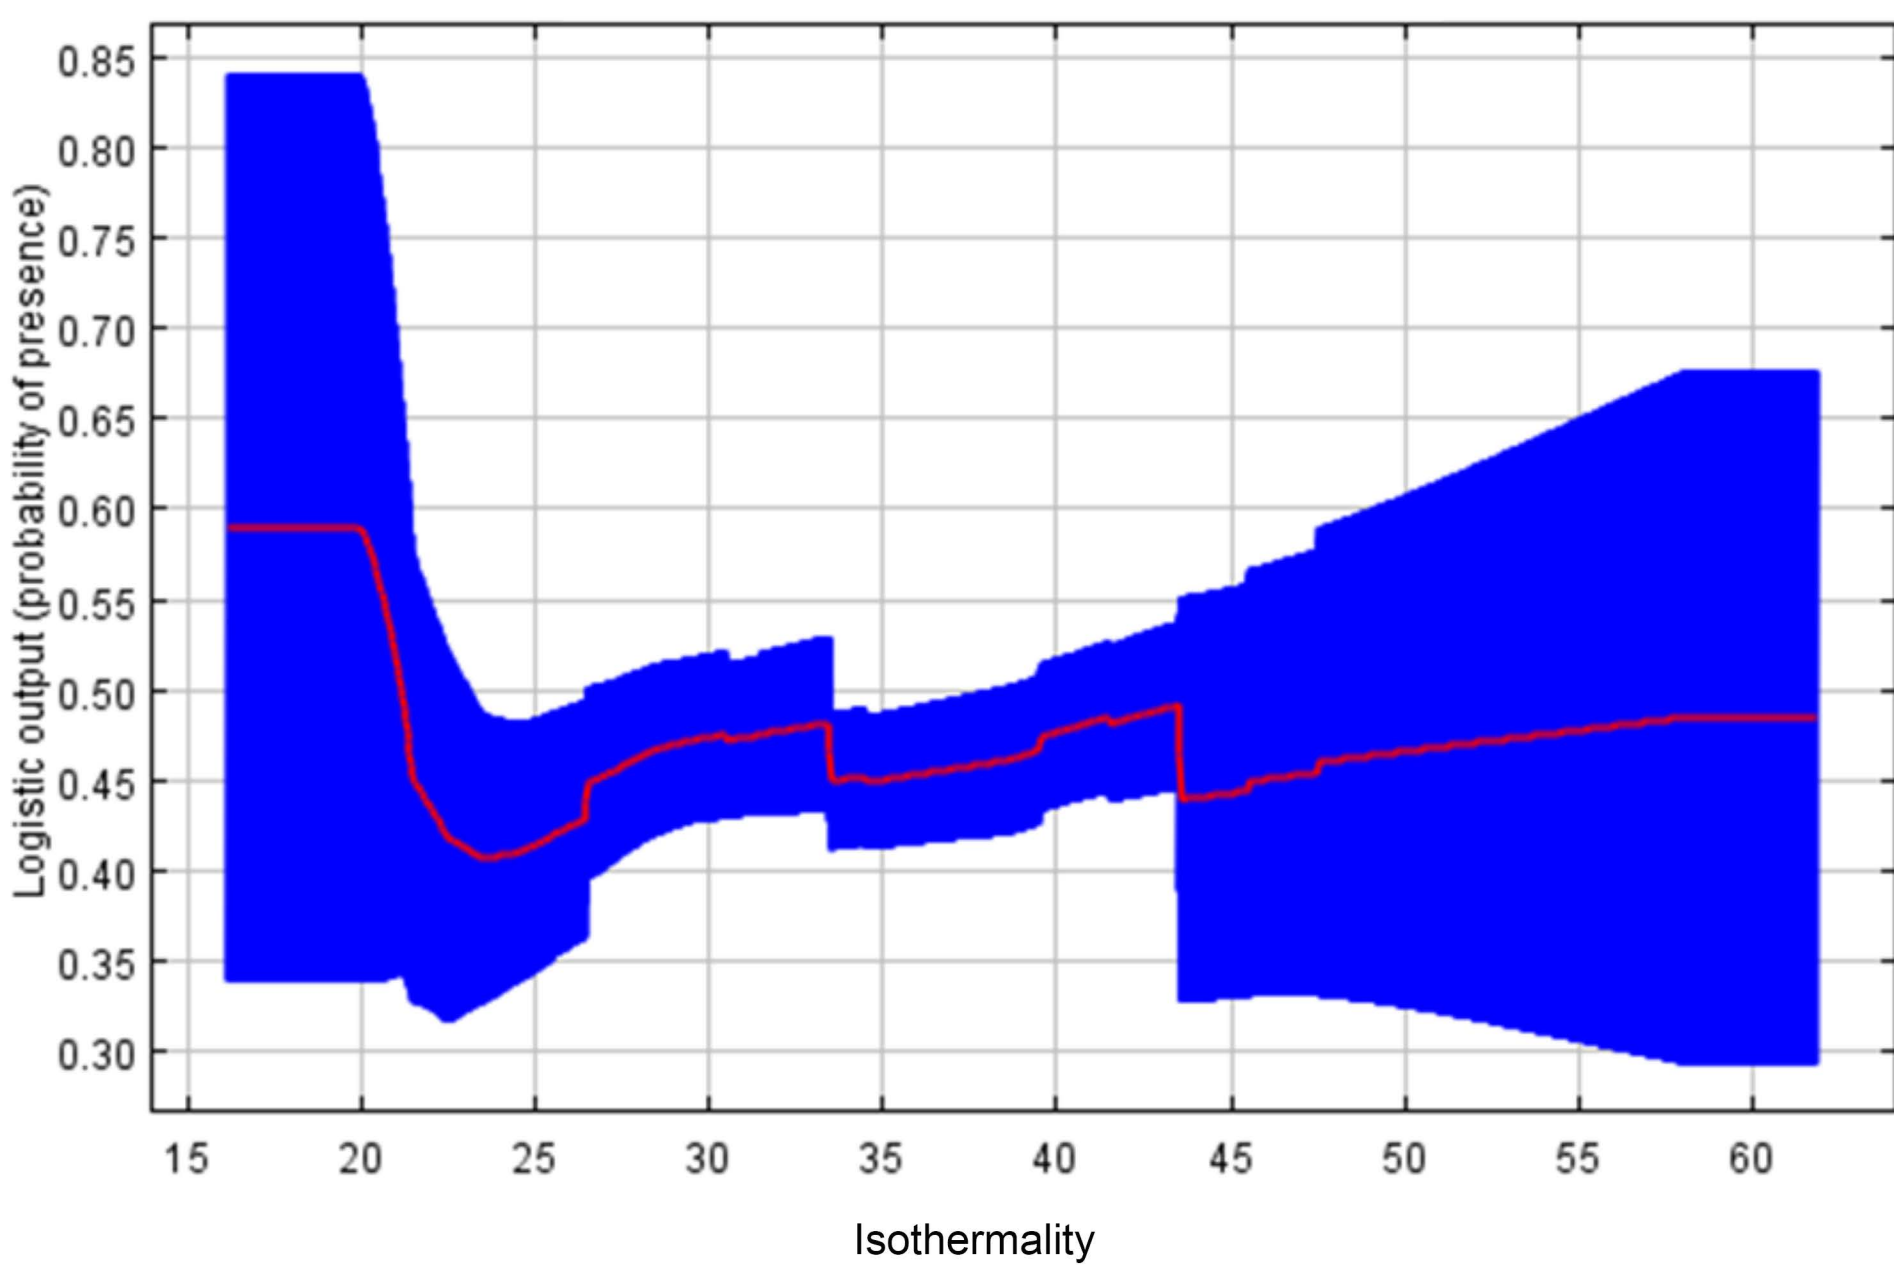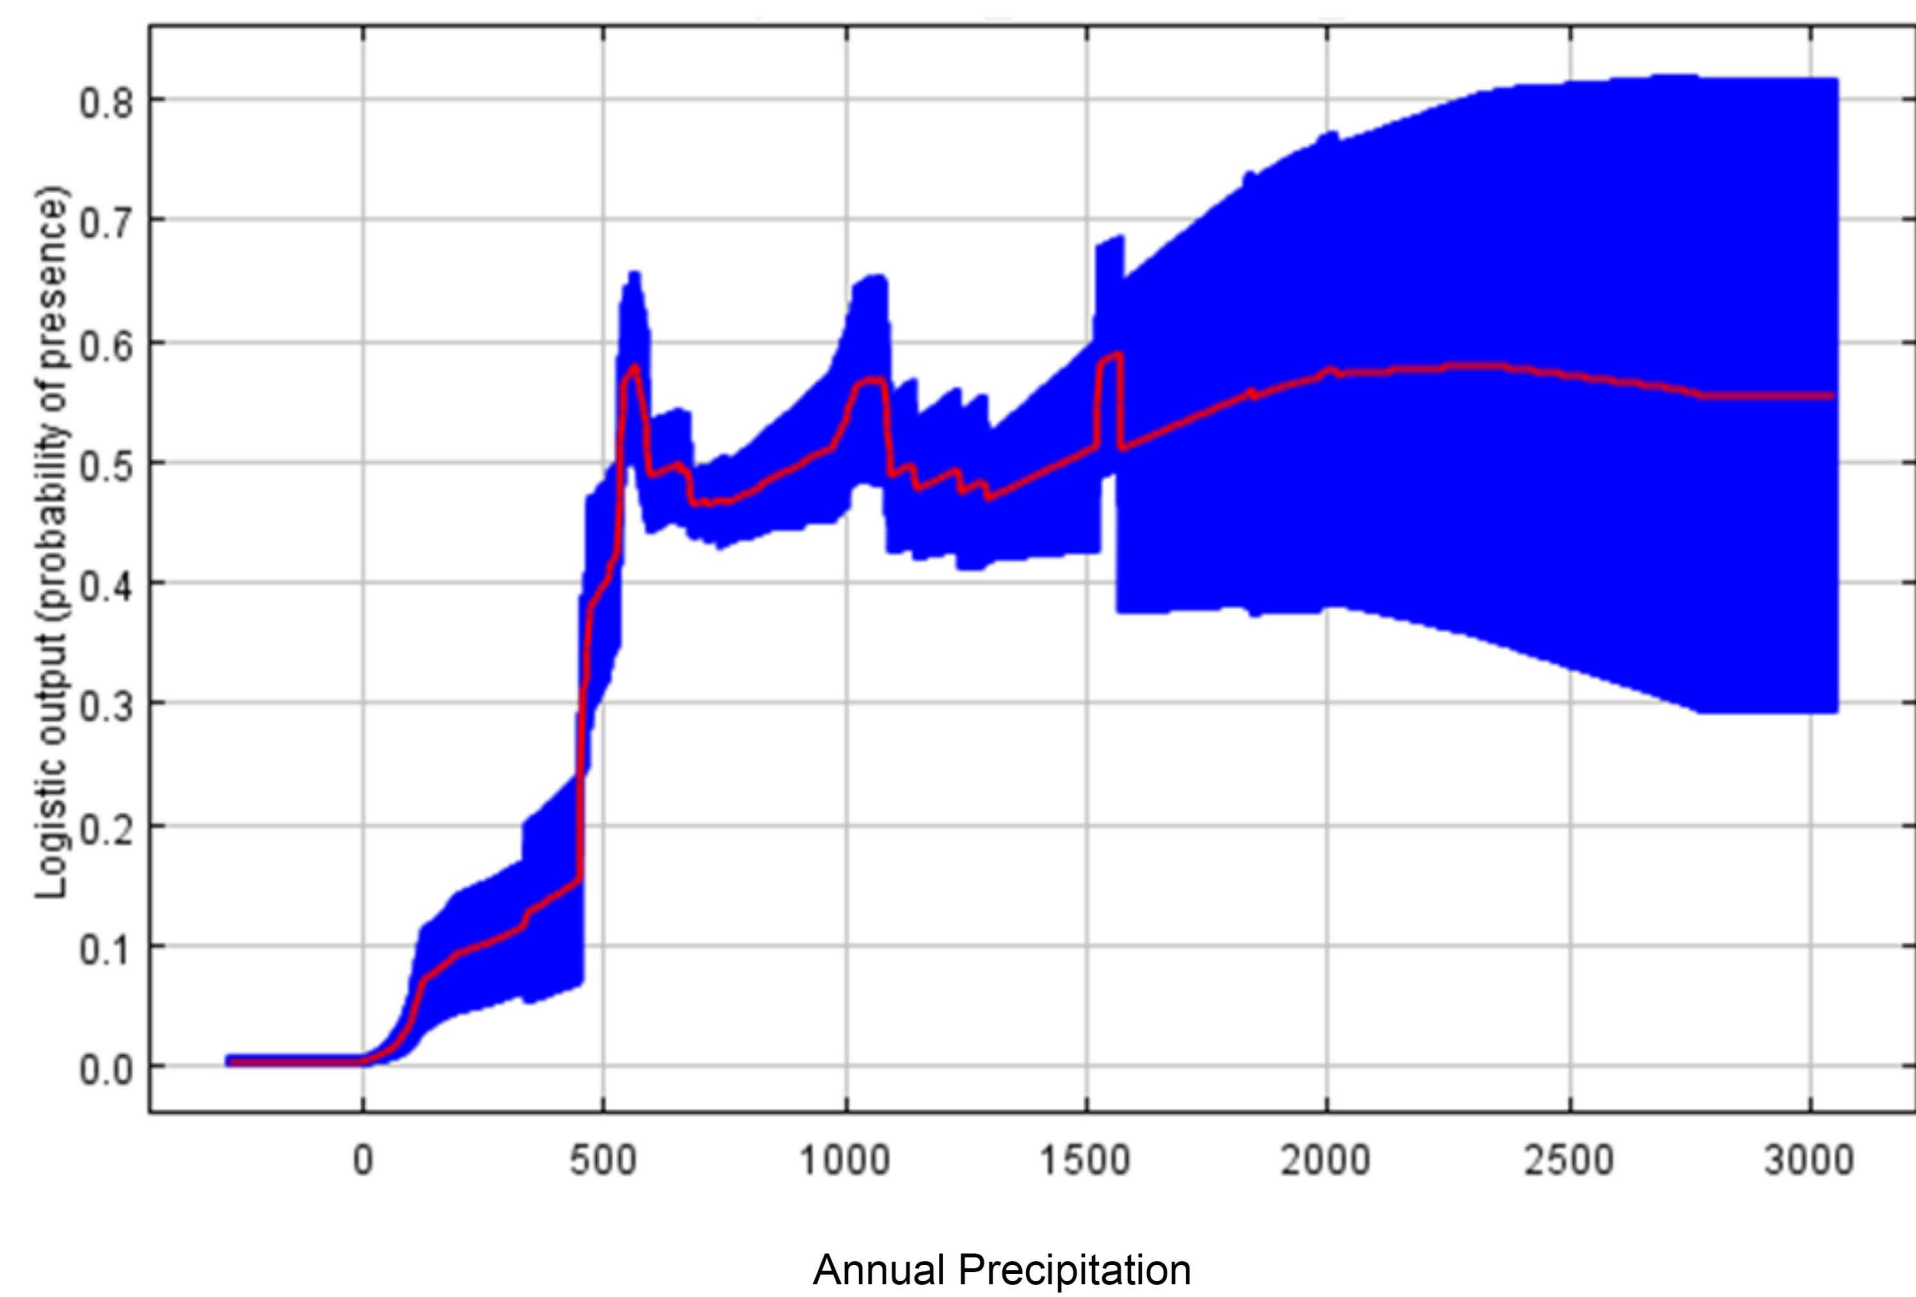

(e)

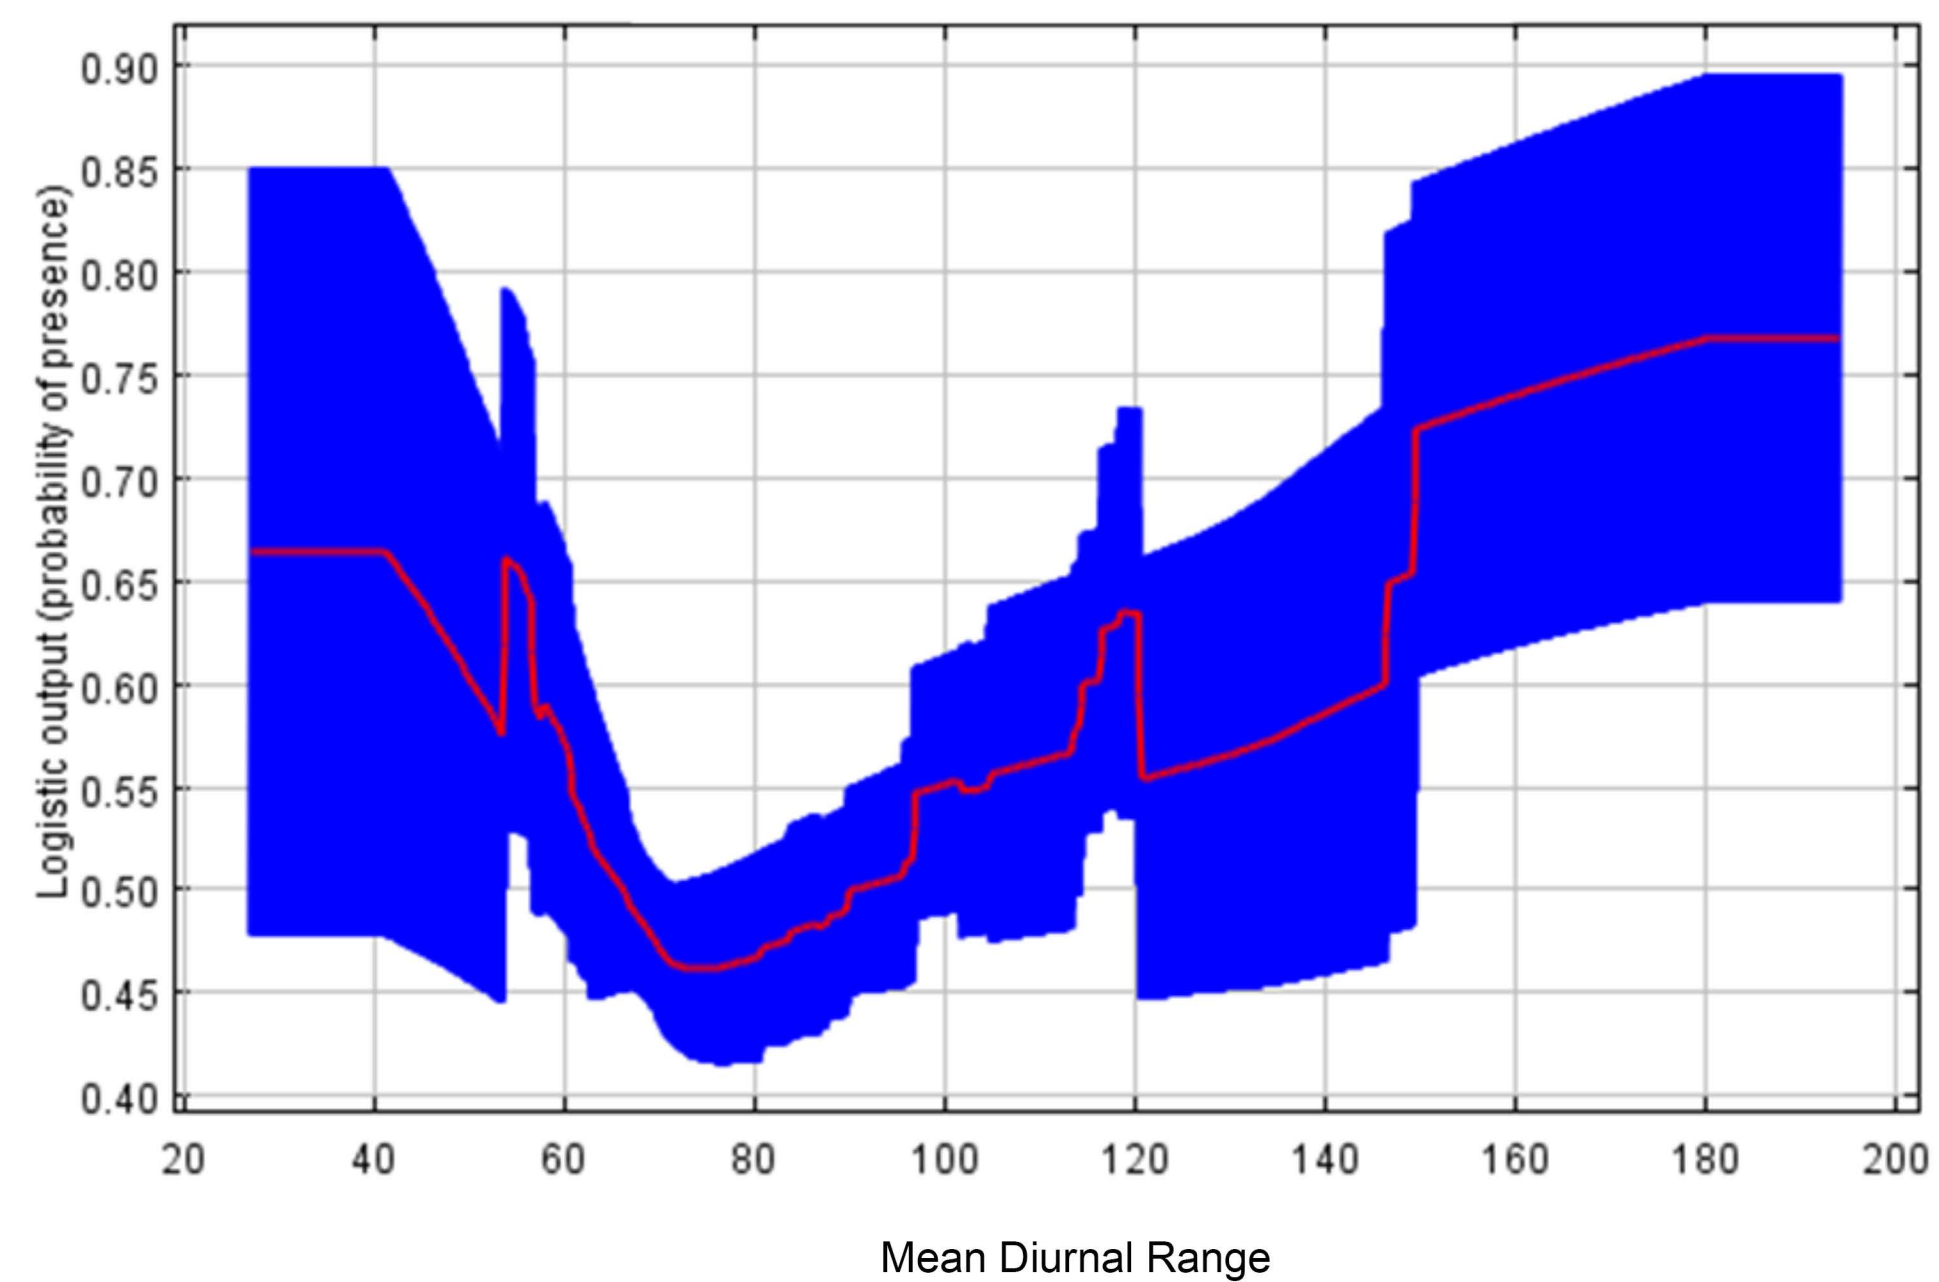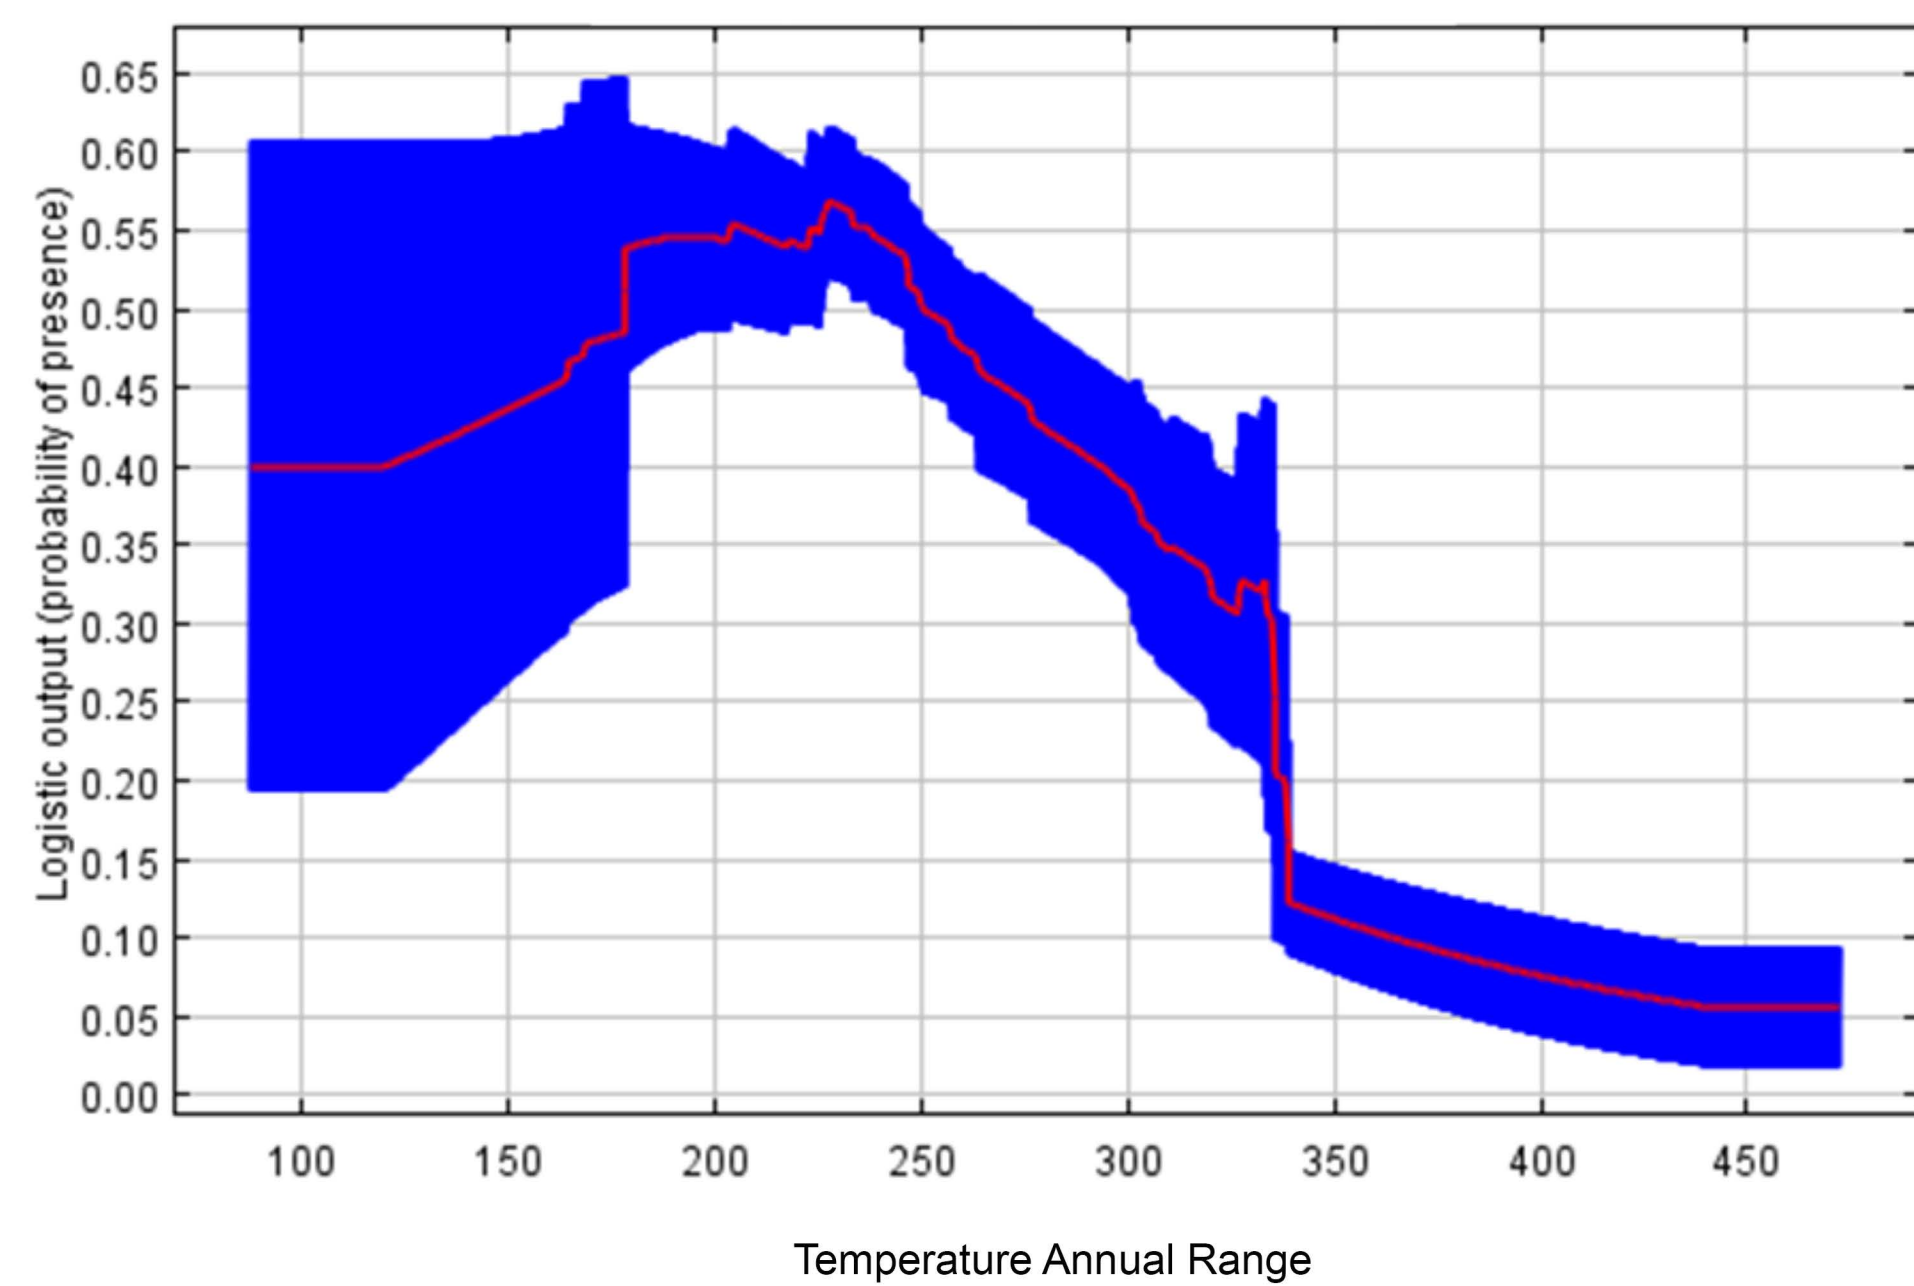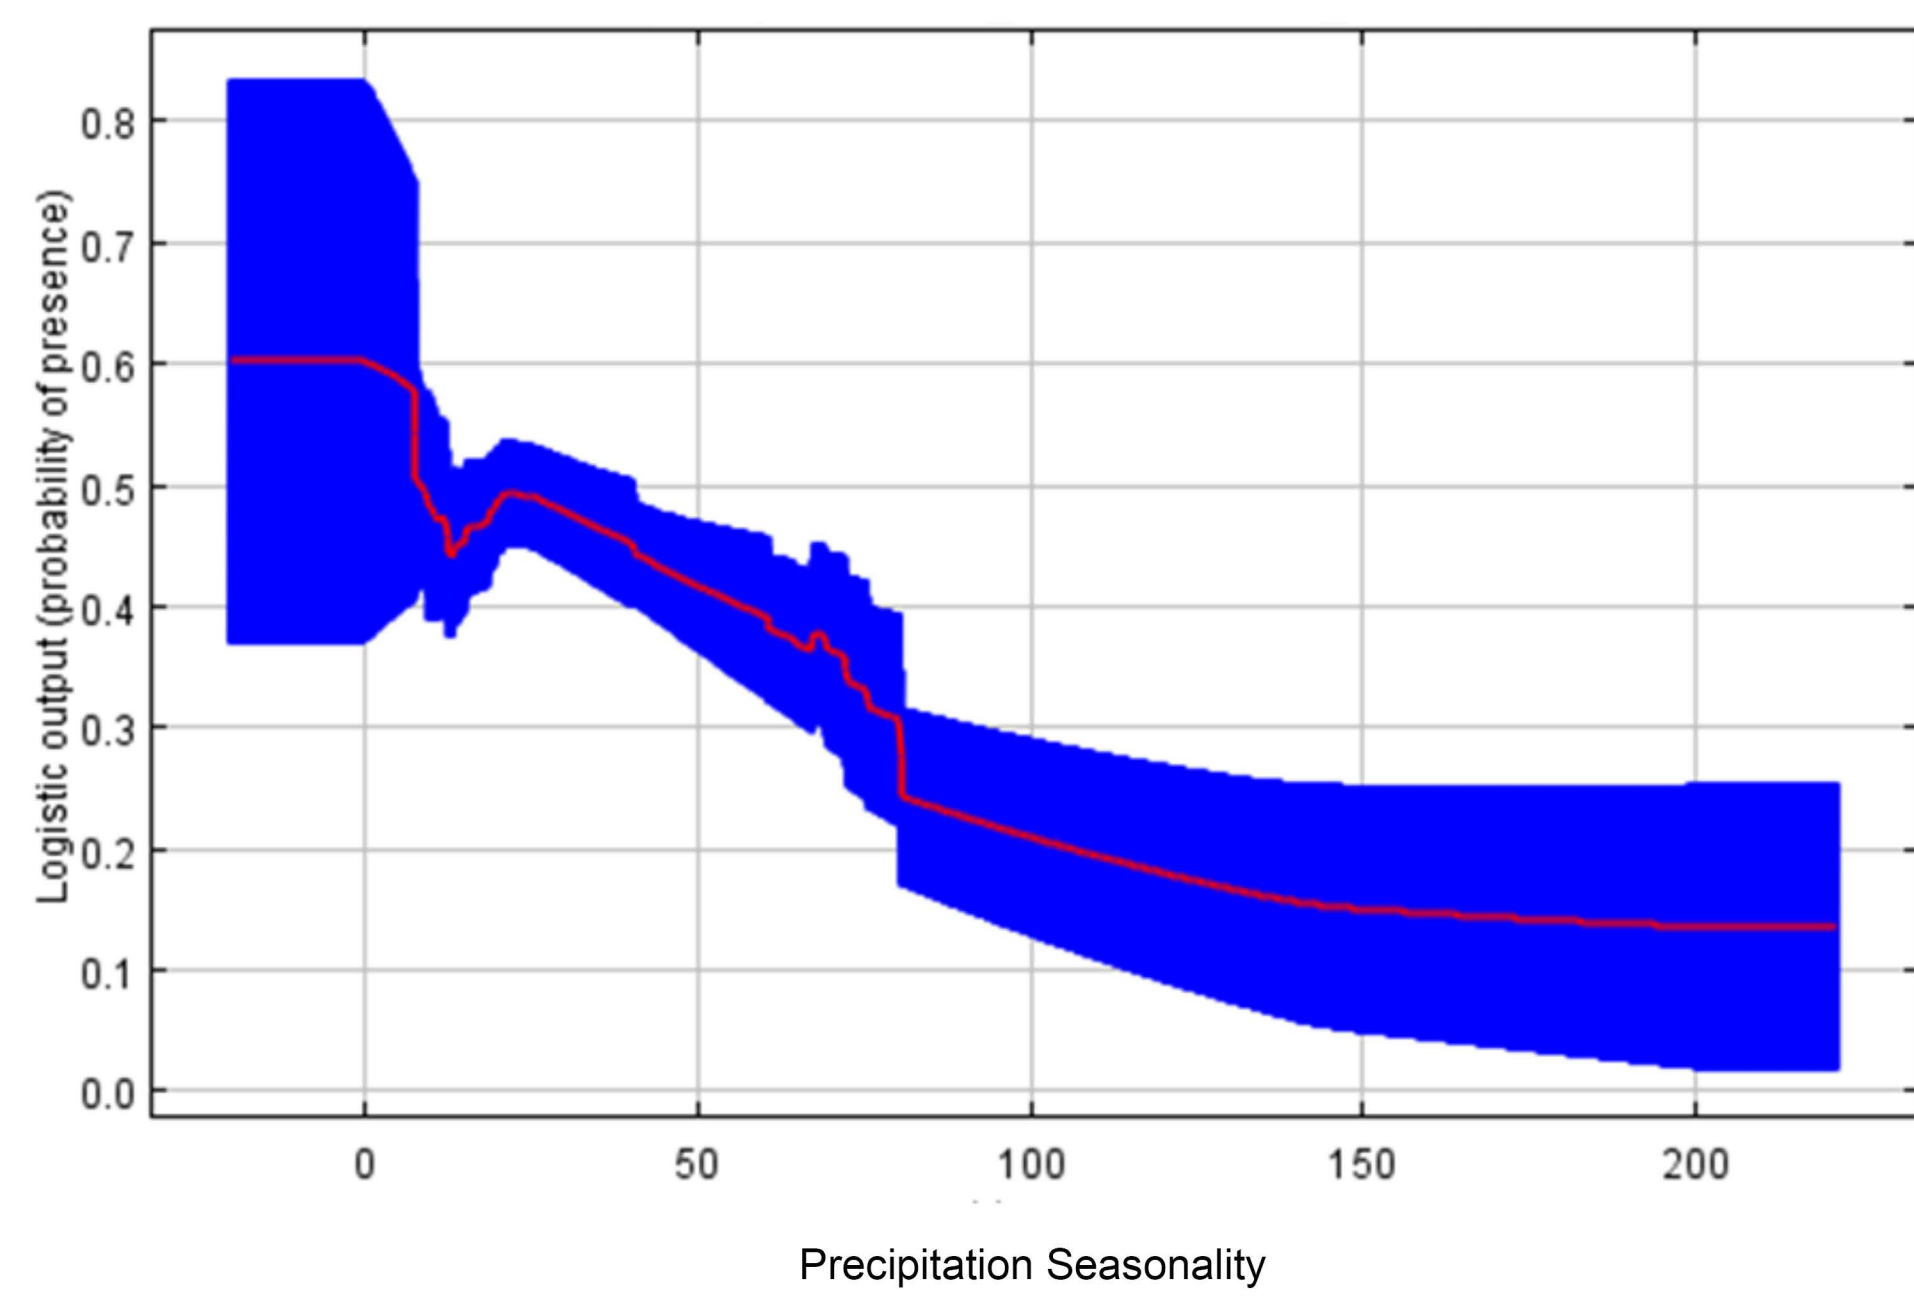

Supplement: pone.0189092.s004.pdf [file pone.0189092.s004.pdf]
